# Supplementary material for: Potential impact of physical distancing on physical and mental health: a rapid narrative umbrella review of meta-analyses on the link between social connection and health
Source: PubMed Central journal article supplement — BMJ Open. 2021 Mar 18;11(3):e042335. doi: 10.1136/bmjopen-2020-042335 (PMC7978290; doi:10.1136/bmjopen-2020-042335), 2021-03-18
Supplement: bmjopen-2020-042335.draft_revisions.pdf [file bmjopen-2020-042335.draft_revisions.pdf]

# BMJ Open

BMJ Open is committed to open peer review. As part of this commitment we make the peer review history of every article we publish publicly available.

When an article is published we post the peer reviewers' comments and the authors' responses online. We also post the versions of the paper that were used during peer review. These are the versions that the peer review comments apply to.

The versions of the paper that follow are the versions that were submitted during the peer review process. They are not the versions of record or the final published versions. They should not be cited or distributed as the published version of this manuscript.

BMJ Open is an open access journal and the full, final, typeset and author-corrected version of record of the manuscript is available on our site with no access controls, subscription charges or pay-per-view fees (<http://bmjopen.bmj.com>).

If you have any questions on BMJ Open's open peer review process please email [info.bmjopen@bmj.com](mailto:info.bmjopen@bmj.com)

# BMJ Open

## **A potential impact of social distancing on physical and mental health. A rapid narrative umbrella review of meta-analyses on the link between social isolation and health**

|                               |                                                                                                                                                                                                                                                                                                                                              |
|-------------------------------|----------------------------------------------------------------------------------------------------------------------------------------------------------------------------------------------------------------------------------------------------------------------------------------------------------------------------------------------|
| Journal:                      | <i>BMJ Open</i>                                                                                                                                                                                                                                                                                                                              |
| Manuscript ID                 | bmjopen-2020-042335                                                                                                                                                                                                                                                                                                                          |
| Article Type:                 | Original research                                                                                                                                                                                                                                                                                                                            |
| Date Submitted by the Author: | 02-Jul-2020                                                                                                                                                                                                                                                                                                                                  |
| Complete List of Authors:     | Morina, Nexhmedin ; University of Münster, Psychology<br>Kip, Ahlke; University of Münster, Psychology<br>Hoppen, Thole; University of Münster, Psychology<br>Priebe, Stefan; Queen Mary University of London Faculty of Medicine and Dentistry, Unit of Social and Community Psychiatry<br>Meyer, Thomas; University of Münster, Psychology |
| Keywords:                     | PUBLIC HEALTH, Health policy < HEALTH SERVICES ADMINISTRATION & MANAGEMENT, Risk management < HEALTH SERVICES ADMINISTRATION & MANAGEMENT, MENTAL HEALTH, Health & safety < HEALTH SERVICES ADMINISTRATION & MANAGEMENT                                                                                                                      |
|                               |                                                                                                                                                                                                                                                                                                                                              |

SCHOLARONE™  
Manuscripts

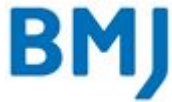

I, the Submitting Author has the right to grant and does grant on behalf of all authors of the Work (as defined in the below author licence), an exclusive licence and/or a non-exclusive licence for contributions from authors who are: i) UK Crown employees; ii) where BMJ has agreed a CC-BY licence shall apply, and/or iii) in accordance with the terms applicable for US Federal Government officers or employees acting as part of their official duties; on a worldwide, perpetual, irrevocable, royalty-free basis to BMJ Publishing Group Ltd ("BMJ") its licensees and where the relevant Journal is co-owned by BMJ to the co-owners of the Journal, to publish the Work in this journal and any other BMJ products and to exploit all rights, as set out in our [licence](#).

The Submitting Author accepts and understands that any supply made under these terms is made by BMJ to the Submitting Author unless you are acting as an employee on behalf of your employer or a postgraduate student of an affiliated institution which is paying any applicable article publishing charge ("APC") for Open Access articles. Where the Submitting Author wishes to make the Work available on an Open Access basis (and intends to pay the relevant APC), the terms of reuse of such Open Access shall be governed by a Creative Commons licence – details of these licences and which [Creative Commons](#) licence will apply to this Work are set out in our licence referred to above.

Other than as permitted in any relevant BMJ Author's Self Archiving Policies, I confirm this Work has not been accepted for publication elsewhere, is not being considered for publication elsewhere and does not duplicate material already published. I confirm all authors consent to publication of this Work and authorise the granting of this licence.

1  
2  
3  
4  
5  
6  
7  
8 **A potential impact of social distancing on physical and mental health. A rapid**  
9 **narrative umbrella review of meta-analyses on the link between social isolation**  
10 **and health**  
11  
12  
13  
14  
15  
16

17 Nexhmedin Morina, Ph.D.<sup>1</sup>, Ahlke Kip, M.Sc.<sup>1</sup>, Thole H. Hoppen, Ph.D.<sup>1</sup>, Stefan  
18 Priebe, FRCPsych<sup>2</sup>, Thomas Meyer, Ph.D.<sup>1</sup>  
19  
20  
21  
22

23  
24 <sup>1</sup> Institute of Psychology, University of Münster, Münster, Germany  
25

26 <sup>2</sup> Unit for Social and Community Psychiatry, Queen Mary University of London,  
27 London, UK  
28  
29  
30  
31  
32  
33  
34  
35  
36  
37

38 Short Title: Social isolation and physical and mental health  
39

40 Word count (excl. references): 3017  
41  
42  
43  
44

45 \* Corresponding Author  
46

47 Nexhmedin Morina, Ph.D.  
48

49 Institute of Psychology  
50

51 University of Münster  
52

53 Fliegerstr. 21, 48149 Münster, Germany  
54

55 e-Mail: [morina@uni-muenster.de](mailto:morina@uni-muenster.de)  
56  
57  
58  
59  
60

## Abstract

**Background:** The imperative for social distancing during the coronavirus disease 2019 (COVID-19) pandemic may deteriorate physical and mental health. We aimed at summarizing the strength of evidence in the published literature on the association of social isolation and loneliness with physical and mental health.

**Methods:** We conducted a systematic search in April 2020 to identify meta-analyses using the Medline, PsycINFO, and Web of Science databases. The search strategy included terms of social isolation, loneliness, living alone, and meta-analysis. Eligible meta-analyses needed to report any sort of association between an indicator of social isolation and any physical or mental health outcome. The findings were summarized in a narrative synthesis.

**Results:** Twenty-five meta-analyses met our criteria, of which 10 focused on physical health and 15 on mental health outcomes. A total of more than 3 million individuals had participated in the 692 primary studies. The results suggest that social isolation is associated with chronic physical symptoms, frailty, coronary heart disease, malnutrition, hospital readmission, reduced vaccine uptake, early mortality, depression, social anxiety, psychosis, cognitive impairment in later life, and suicidal ideation.

**Conclusions:** The existing evidence clearly indicates that social isolation is associated with a range of poor physical and mental health outcomes. A potential negative impact on these outcomes needs to be considered in future decisions on social distancing measures.

**Keywords:** Social isolation, loneliness, physical health, mental health, disease.

**Strengths and limitations of this study:**

- This rapid umbrella review focuses on a timely and societally relevant issue.
- The systematic literature search was conducted in three major databases from inception up to April 2020 warranting an extensive and up-to-date overview on relevant meta-analyses in the field.
- Quality of included meta-analyses was rated with a standardized measure.
- Different indicators of social isolation were included.
- The utilized method did not allow for a quantitative comparison of associations with health outcomes.

## Background

The coronavirus 2019 (COVID-19) pandemic poses a global public health threat. In order to slow the spread of the virus by reducing contact rates, governments around the world have taken unprecedented political decisions that have transformed societies. The exact form and extent of these measures have varied, but they always include some type of social distancing making it impossible for people to maintain their normal social life.

In many countries, the restrictions have already been in place for several weeks or months. Depending on the further course of the pandemic with potential new waves, restrictions might continue for longer periods of time or be re-imposed after periods of loosening or abandoning them. When deciding about imposing, continuing or relaxing measures of social distancing, governments have to consider and balance different risks. Whilst social distancing is likely to reduce the risk of spreading the virus, it might generate other risks. These include potential damages to the economy and also possible negative consequences for the health of the population. For a balanced decision on further social distancing measures, evidence is required on whether the measures are likely to impact on a range of health outcomes.

For many people, social distancing can translate into social isolation, when they are prevented from travelling, physical meetings with friends and social activities, in some cases even from leaving their home other than for essential activities. Social isolation is a wide term without a consistent definition in the literature. Three indicators of social isolation are commonly used in research: low number of social contacts, loneliness and living alone.<sup>1</sup> The number of social contacts is a behavioral measure that can – at least in theory – be objectively quantified. Loneliness is an individual's subjective assessment of the quality and quantity of their

1  
2  
3 social relationships, reflecting a belief that they have too few or too poor  
4  
5 relationships, or both. Living alone describes a basic characteristic of an individual's  
6  
7 social situation which can be associated with reduced social relationships, but is not  
8  
9 necessarily so. Although these three indicators capture distinct aspects of social  
10  
11 isolation, they commonly overlap and are associated with each other.  
12  
13

14  
15 The extent to which individuals are socially isolated can have a profound  
16  
17 impact on both physical and psychological well-being.<sup>2</sup> Social isolation is thought to  
18  
19 influence health through behavioral and biological pathways.<sup>3</sup> Several studies  
20  
21 demonstrate that social isolation is associated with health-relevant behaviors, such as  
22  
23 lack of physical activity, poorer sleep, obsessive behavior, as well as neuroendocrine  
24  
25 dysregulation,<sup>3</sup> chronic allostatic load,<sup>4</sup> high blood pressure and poor immune  
26  
27 functioning.<sup>2,5,6</sup> Furthermore, the magnitude of the effect of social isolation on  
28  
29 mortality may be equivalent to or exceed the impacts of deleterious behaviors such as  
30  
31 excessive drinking or obesity.<sup>7</sup>  
32  
33

34  
35 Social distancing with its inevitable increase of social isolation may therefore  
36  
37 have a negative impact on physical and mental health. For weighing up this potential  
38  
39 impact in policy decisions, the existing evidence needs to be considered. Against this  
40  
41 background, we conducted a systematic umbrella review to synthesize the evidence  
42  
43 on the association between social isolation and physical and mental health outcomes.  
44  
45 As recommended by the World Health Organization (WHO), we explored relevant  
46  
47 meta-analyses by means of a rapid review of evidence.<sup>8</sup>  
48  
49  
50  
51

## 52 53 **Methods**

54  
55 The aims and methods of this umbrella review were registered with the PROSPERO  
56  
57 database (<http://www.crd.york.ac.uk/prospero>). To select relevant meta-analyses on  
58  
59  
60



1  
2  
3 the association between social isolation and physical or mental health outcomes we  
4 conducted a systematic search on 6<sup>th</sup> April 2020 using the databases Medline,  
5  
6  
7  
8 PsycINFO, and Web of Science. We conducted multi-field searches (in titles,  
9  
10  
11  
12 abstracts, and key concepts) using the following terms: social isolation, loneliness,  
13  
14  
15 living alone, and meta-analy\*, which we combined using the Boolean operators “or”  
16  
17 plus “and”. Relevant outcomes included any sort of physical or mental health  
18  
19  
20 outcome. We applied no restrictions on age of participants, applied research designs  
21  
22 (i.e., cross-sectional, longitudinal), or publication language. We first inspected the  
23  
24 title and abstract of all hits and then read full texts of the hits that seemed to meet the  
25  
26  
27  
28  
29  
30  
31  
32  
33  
34  
35  
36  
37  
38  
39  
40  
41  
42  
43  
44  
45  
46  
47  
48  
49  
50  
51  
52  
53  
54  
55  
56  
57  
58  
59  
60

the aforementioned inclusion criteria. The Preferred Reporting Items for Systematic Reviews and Meta-analyses reporting standards were followed to document the process of systematic review selection.<sup>9</sup>

### **Coding of trial characteristics**

Systematic reviews with a quantitative synthesis of trial results (meta-analysis) were retained. Two reviewers (NM & THH) coded and extracted from each meta-analysis several objectively verifiable characteristics: Authors and year of publication, inclusion criteria, number of included primary studies, number of participants and their composition by age and health conditions, study design, type of social connection (number of social contacts/living alone/loneliness) evaluated, clinical outcome, length of follow-up, number of databases searched, and search areas. Furthermore, we extracted the main findings on the association between number of social contacts/living alone/loneliness and health outcomes (correlation values, odds ratios, or hazard ratios, and the corresponding 95% confidence intervals). With respect to the 95% confidence intervals, both values greater than one (or both values

1  
2  
3 less than one) represent a significant increase (or decrease) as a function of social  
4  
5 isolation.  
6

### 7 **Quality Assessment**

8  
9  
10 The quality of included systematic meta-analyses was independently assessed by two  
11  
12 reviewers (AK & TM) using A Measurement Tool to Assess Systematic Reviews – 2  
13  
14 (AMSTAR-2).<sup>10</sup> Following the tool's guidelines, the raters assigned one of four  
15  
16 global quality ratings (i.e., high, moderate, low, or critically low) after consideration  
17  
18 of 16 potential critical and non-critical weaknesses. Items addressing the following  
19  
20 criteria were considered as critical: Clear research question including definitions of  
21  
22 population, intervention, control group, and outcomes (PICO), adequacy of the  
23  
24 literature search, and adequate assessment and/or consideration of risk of bias in the  
25  
26 primary studies. Typically, high and moderate ratings reflect the presence of one or  
27  
28 more non-critical weakness, while low and critically low ratings indicate one or more  
29  
30 critical weaknesses. Any discrepancies among the independent raters were discussed  
31  
32 until consensus was reached.  
33  
34  
35  
36  
37  
38  
39  
40

## 41 **Results**

### 42 **Selection and characteristics of included studies**

43  
44  
45 Figure 1 displays a PRISMA<sup>9</sup> flow diagram of the publication selection process. After  
46  
47 reading 530 abstracts, 89 full text publications were reviewed. The final review  
48  
49 resulted in 25 meta-analyses. Relevant characteristics of these meta-analyses are  
50  
51 summarized in Table 1.  
52  
53  
54  
55  
56  
57  
58  
59  
60

**Table 1: Overview of the included meta-analyses**

| Publication                        | Social connections                                      | Clinical outcome                               | Study design                 | Age: <i>M (SD)</i> , range, or cut-off | Search: timespan                                                  | Range of follow-up | <i>N</i> data-bases searched | Quality score |
|------------------------------------|---------------------------------------------------------|------------------------------------------------|------------------------------|----------------------------------------|-------------------------------------------------------------------|--------------------|------------------------------|---------------|
| <b>Results:</b>                    |                                                         |                                                |                              |                                        |                                                                   |                    |                              |               |
| <i>Studies on physical health:</i> |                                                         |                                                |                              |                                        |                                                                   |                    |                              |               |
| Besora-Moreno et al., 2020         | Living alone                                            | Malnutrition/<br>malnutrition risk             | Cross-sectional              | 60+                                    | 01.2000 -<br>12.2018                                              | n.a.               | 2                            | L             |
| Results:                           | Living alone                                            | Combined effect                                |                              |                                        | <b>OR=1.92</b> (95% CI: 1.73–2.14); <i>k</i> =10; <i>N</i> =9,042 |                    |                              |               |
| Heidari Gorji et al., 2019         | Living alone, low number of social contacts, loneliness | Hospital readmission in heart failure patients | Longitudinal                 | 70.87 (8.62)                           | up to 11.2018                                                     | 13 months          | 6                            | H             |
| Results:                           | Any type of poor social connection                      | Combined effect                                |                              |                                        | <b>OR=1.55</b> (95% CI: 1.39–1.73); <i>k</i> =13; <i>N</i> =6,468 |                    |                              |               |
|                                    | Living alone or low number of social contacts           | Combined effect                                |                              |                                        | <b>OR=1.52</b> (95% CI: 1.24–1.86); <i>k</i> =6; <i>N</i> =3,812  |                    |                              |               |
|                                    | Loneliness                                              | Combined effect                                |                              |                                        | <b>OR=1.63</b> (95% CI: 1.31–2.01); <i>k</i> =7; <i>N</i> =2,656  |                    |                              |               |
| Holt-Lunstad et al., 2015          | Living alone, low number of social contacts, loneliness | Early mortality                                | Longitudinal                 | 66.00 (n.r.)                           | 01.1980 -<br>02.2014                                              | 7.1 years          | 5                            | L             |
| Results:                           | Living alone                                            | Unadjusted studies                             |                              |                                        | <b>OR=1.51</b> (95% CI: 1.32–1.74); <i>k</i> =20; <i>N</i> =n.r.  |                    |                              |               |
|                                    | Living alone                                            | Studies with multiple covariates               |                              |                                        | <b>OR=1.32</b> (95% CI: 1.14–1.53); <i>k</i> =25; <i>N</i> =n.r.  |                    |                              |               |
|                                    | Low number of social contacts                           | Unadjusted studies                             |                              |                                        | <b>OR=1.83</b> (95% CI: 1.27–2.63); <i>k</i> =3; <i>N</i> =n.r.   |                    |                              |               |
|                                    | Low number of social contacts                           | Studies with multiple covariates               |                              |                                        | <b>OR=1.29</b> (95% CI: 1.06–1.56); <i>k</i> =14; <i>N</i> =n.r.  |                    |                              |               |
|                                    | Loneliness                                              | Unadjusted studies                             |                              |                                        | <b>OR=1.49</b> (95% CI: 1.22–1.84); <i>k</i> =8; <i>N</i> =n.r.   |                    |                              |               |
|                                    | Loneliness                                              | Studies with multiple covariates               |                              |                                        | <b>OR=1.26</b> (95% CI: 1.04–1.53); <i>k</i> =13; <i>N</i> =n.r.  |                    |                              |               |
| Jain et al., 2017                  | Living alone                                            | Reduced vaccine uptake in older adults         | Cross-sectional <sup>a</sup> | 60+                                    | up to 02.2016                                                     | n.r.               | 2                            | M             |
| Results:                           | Living alone                                            | Seasonal influenza vaccine                     |                              |                                        | <b>OR=1.39</b> (95% CI: 1.16–1.68); <i>k</i> =9; <i>N</i> =40,551 |                    |                              |               |
|                                    | Living alone                                            | Pneumococcal vaccine                           |                              |                                        | <b>OR=1.71</b> (95% CI: 1.20–2.46); <i>k</i> =1; <i>N</i> =1,702  |                    |                              |               |

|                         |                                           |                                                     |                                        |                                    |                |      |   |                                                                     |
|-------------------------|-------------------------------------------|-----------------------------------------------------|----------------------------------------|------------------------------------|----------------|------|---|---------------------------------------------------------------------|
| Kojima et al., 2020     | Living alone                              | Frailty in older adults                             | Cross-sectional & longitudinal         | 60+                                | 2000 - 02.2019 | n.r. | 1 | L                                                                   |
| Results:                | Living alone                              |                                                     | Cross-sectional studies                |                                    |                |      |   | <b>OR=1.28</b> (95% CI: 1.13–1.45); <i>k</i> =44; <i>N</i> =113,374 |
|                         |                                           |                                                     | Sub-analysis: only men                 |                                    |                |      |   | <b>OR=1.71</b> (95% CI: 1.49–1.96); <i>k</i> =20; <i>N</i> =n.r.    |
|                         |                                           |                                                     | Sub-analysis: only women               |                                    |                |      |   | OR=1.00 (95% CI: 0.83–1.20); <i>k</i> =22; <i>N</i> =n.r.           |
|                         |                                           |                                                     | Sub-analysis: >=60, <70 years old      |                                    |                |      |   | <b>OR=1.67</b> (95% CI: 1.51–1.86); <i>k</i> =4; <i>N</i> =n.r.     |
|                         |                                           |                                                     | Sub-analysis: >=80 years old           |                                    |                |      |   | OR=0.96 (95% CI: 0.69–1.31); <i>k</i> =6; <i>N</i> =n.r.            |
|                         | Living alone                              |                                                     | Longitudinal studies                   |                                    |                |      |   | OR=0.88 (95% CI: 0.76–1.03); <i>k</i> =6; <i>N</i> =38,549          |
| Maes et al., 2017       | Loneliness                                | Chronic physical conditions in children/adolescents | Cross-sectional <sup>a</sup>           | children < 12 and adolescents < 21 | 1987 – 06.2016 | n.r. | 4 | L                                                                   |
| Results:                | Loneliness                                |                                                     | Combined effect (excl. 3 outliers)     |                                    |                |      |   | <b>g=0.17</b> (95% CI: 0.03–0.30); <i>k</i> =40; <i>N</i> =3,981    |
|                         |                                           |                                                     | Sub-analysis: control group studies    |                                    |                |      |   | <b>g=0.13</b> (95% CI: 0.01–0.26); <i>k</i> =23; <i>N</i> =2,995    |
|                         |                                           |                                                     | Sub-analysis: hearing/visual problems  |                                    |                |      |   | <b>g=0.43</b> (n.r.); <i>k</i> =8; <i>N</i> =770                    |
| Rico-Uribe et al., 2018 | Loneliness                                | Early mortality                                     | Longitudinal                           | Mainly 50+                         | up to 06.2016  | n.r. | 4 | H                                                                   |
| Results:                | Loneliness                                |                                                     | Combined effect                        |                                    |                |      |   | <b>HR=1.22</b> (95% CI: 1.10–1.35); <i>k</i> =31; <i>N</i> =77,220  |
|                         |                                           |                                                     | Sub-analysis: only men                 |                                    |                |      |   | <b>HR=1.44</b> (95% CI: 1.19–1.76); <i>k</i> =7; <i>N</i> =5,815    |
|                         |                                           |                                                     | Sub-analysis: only women               |                                    |                |      |   | <b>HR=1.26</b> (95% CI: 1.07–1.48); <i>k</i> =7; <i>N</i> =10,248   |
| Smith et al, 2020       | Low number of social contacts, loneliness | Inflammation markers                                | Cross-sectional <sup>a</sup>           | 16+                                | up to 07.2019  | n.r. | 5 | H                                                                   |
| Results:                | Low number of social contacts             |                                                     | C-reactive protein: unadjusted studies |                                    |                |      |   | <b>r=-.186</b> (95% CI: .063–.303); <i>k</i> =7; <i>N</i> =41,126   |
|                         |                                           |                                                     | C-reactive protein: adjusted studies   |                                    |                |      |   | <i>r</i> =.021 (95% CI: .051–.092); <i>k</i> =11; <i>N</i> =41,911  |
|                         |                                           |                                                     | Fibrinogen: unadjusted studies         |                                    |                |      |   | <b>r=.103</b> (95% CI: .043–.163); <i>k</i> =6; <i>N</i> =15,421    |
|                         |                                           |                                                     | Fibrinogen: adjusted studies           |                                    |                |      |   | <b>r=.039</b> (95% CI: .011–.067); <i>k</i> =6; <i>N</i> =22,161    |
|                         |                                           |                                                     | Interleukin-6: unadjusted studies      |                                    |                |      |   | <i>r</i> =.267 (95% CI: -.341–.718); <i>k</i> =4; <i>N</i> =12,291  |
|                         |                                           |                                                     | Interleukin-6: adjusted studies        |                                    |                |      |   | <i>r</i> =-.003 (95% CI: -.148–.141); <i>k</i> =6; <i>N</i> =14,243 |
|                         | Loneliness                                |                                                     | C-reactive protein: unadjusted studies |                                    |                |      |   | <i>r</i> =.047 (95% CI: -.003–.098); <i>k</i> =8; <i>N</i> =17,835  |
|                         |                                           |                                                     | C-reactive protein: adjusted studies   |                                    |                |      |   | <i>r</i> =.023 (95% CI: -.018–.065); <i>k</i> =6; <i>N</i> =19,292  |
|                         |                                           |                                                     | Fibrinogen: unadjusted studies         |                                    |                |      |   | <i>r</i> =.006 (95% CI: -.057–.070); <i>k</i> =3; <i>N</i> =1,806   |

|                                  |                                                                              |                                    |                                            |                 |                   |                                                                                                                   |      |    |                                                                                                      |                                                                                                                                                         |
|----------------------------------|------------------------------------------------------------------------------|------------------------------------|--------------------------------------------|-----------------|-------------------|-------------------------------------------------------------------------------------------------------------------|------|----|------------------------------------------------------------------------------------------------------|---------------------------------------------------------------------------------------------------------------------------------------------------------|
|                                  |                                                                              |                                    |                                            |                 |                   |                                                                                                                   |      |    | Fibrinogen: adjusted studies<br>Interleukin-6: unadjusted studies<br>Interleukin-6: adjusted studies | $r=.037$ (95% CI: -.015–.089); $k=4$ ; $N=7,672$<br>$r=.082$ (95% CI: -.001–.163); $k=4$ ; $N=4,219$<br>$r=.070$ (95% CI: .015–.124); $k=2$ ; $N=1,451$ |
| Steptoe & Kivimäki, 2013         | Social isolation, loneliness                                                 | Cardiovascular disease             | Longitudinal                               | n.r.            | up to 2011        | n.r.                                                                                                              | n.r. | CL |                                                                                                      |                                                                                                                                                         |
| Results:                         | Low number of social contacts or loneliness                                  |                                    | Combined effect                            |                 |                   | <b>RR=1.51</b> (95% CI: 1.21–1.88); $k=7$ ; $N=n.r.$                                                              |      |    |                                                                                                      |                                                                                                                                                         |
| Valtorta et al., 2016            | Social isolation, loneliness                                                 | Coronary heart disease and stroke  | Longitudinal                               | 18+             | up to 05.2015     | 3 to 21 years                                                                                                     | 16   | H  |                                                                                                      |                                                                                                                                                         |
| Results:                         | Low number of social contacts or loneliness<br>Low number of social contacts |                                    | Coronary heart disease<br>Stroke incidence |                 |                   | <b>RR=1.29</b> (95% CI: 1.04–1.59); $k=11$ ; $N=n.r.$<br><b>RR=1.32</b> (95% CI: 1.04–1.68); $k=9$ ; $N=n.r.$     |      |    |                                                                                                      |                                                                                                                                                         |
| <b>Studies on mental health:</b> |                                                                              |                                    |                                            |                 |                   |                                                                                                                   |      |    |                                                                                                      |                                                                                                                                                         |
| Chang et al., 2017               | Living alone, loneliness                                                     | Late-life suicidal ideation        | Cross-sectional <sup>a</sup>               | 50+             | 01.2000 - 11.2016 | n.r.                                                                                                              | 7    | L  |                                                                                                      |                                                                                                                                                         |
| Results:                         | Living alone<br>Loneliness                                                   |                                    | Combined effect<br>Combined effect         |                 |                   | <b>OR=1.38</b> (95% CI: 1.19–1.61); $k=8$ ; $N=102,401$<br><b>OR=2.24</b> (95% CI: 1.73–2.90); $k=3$ ; $N=58,482$ |      |    |                                                                                                      |                                                                                                                                                         |
| Chatterjee et al., 2018          | Low number of social contacts, loneliness                                    | Depression in civilians after 9/11 | Longitudinal                               | 43.78 (n.r.)    | 09.2001 - 07.2016 | n.r.                                                                                                              | 3    | L  |                                                                                                      |                                                                                                                                                         |
| Results:                         | Low number of social contacts or loneliness                                  |                                    | Combined effect                            |                 |                   | <b>OR=1.68</b> (99.5% CI: 1.13–2.49); $k=4$ ; $N=27,395$                                                          |      |    |                                                                                                      |                                                                                                                                                         |
| Chau et al., 2019                | Loneliness                                                                   | Psychosis                          | Cross-sectional <sup>a</sup>               | Adults (mainly) | up 10.2018        | n.r.                                                                                                              | 5    | M  |                                                                                                      |                                                                                                                                                         |
| Results:                         | Loneliness                                                                   |                                    | Positive symptoms                          |                 |                   | <b><math>r=.302</math></b> (95% CI: .243–.359); $k=30$ ; $N=17,832$                                               |      |    |                                                                                                      |                                                                                                                                                         |
|                                  |                                                                              |                                    | Sub-analysis: clinical populations         |                 |                   | <b><math>r=.149</math></b> (95% CI: .057–.238); $k=14$ ; $N=n.r.$                                                 |      |    |                                                                                                      |                                                                                                                                                         |
|                                  |                                                                              |                                    | Sub-analysis: non-clinical populations     |                 |                   | <b><math>r=.389</math></b> (95% CI: .232–.526); $k=5$ ; $N=n.r.$                                                  |      |    |                                                                                                      |                                                                                                                                                         |
|                                  |                                                                              |                                    | Sub-analysis: mixed populations            |                 |                   | <b><math>r=.366</math></b> (95% CI: .308–.422); $k=12$ ; $N=n.r.$                                                 |      |    |                                                                                                      |                                                                                                                                                         |
|                                  |                                                                              |                                    | Sub-analysis: Paranoia                     |                 |                   | <b><math>r=.448</math></b> (95% CI: .371–.519); $k=7$ ; $N=n.r.$                                                  |      |    |                                                                                                      |                                                                                                                                                         |
|                                  |                                                                              |                                    | Sub-analysis: Hallucinations               |                 |                   | <b><math>r=.201</math></b> (95% CI: .101–.297); $k=10$ ; $N=n.r.$                                                 |      |    |                                                                                                      |                                                                                                                                                         |
|                                  | Loneliness                                                                   |                                    | Negative psychotic symptoms                |                 |                   | <b><math>r=.347</math></b> (95% CI: .239–.446); $k=15$ ; $N=5,567$                                                |      |    |                                                                                                      |                                                                                                                                                         |
|                                  |                                                                              |                                    | Sub-analysis: clinical populations         |                 |                   | <b><math>r=.127</math></b> (95% CI: .029–.223); $k=9$ ; $N=n.r.$                                                  |      |    |                                                                                                      |                                                                                                                                                         |
|                                  |                                                                              |                                    | Sub-analysis: non-clinical populations     |                 |                   | <b><math>r=.479</math></b> (95% CI: .351–.589); $k=4$ ; $N=n.r.$                                                  |      |    |                                                                                                      |                                                                                                                                                         |
|                                  |                                                                              |                                    | Sub-analysis: mixed populations            |                 |                   | <b><math>r=.547</math></b> (95% CI: .464–.620); $k=2$ ; $N=n.r.$                                                  |      |    |                                                                                                      |                                                                                                                                                         |

|                        |                                           |                                            |                                        |                        |                                                                     |                   |   |    |
|------------------------|-------------------------------------------|--------------------------------------------|----------------------------------------|------------------------|---------------------------------------------------------------------|-------------------|---|----|
| Choi & Smith, 2013     | Low number of social contacts             | Adolescents' smoking behaviors             | Cross-sectional                        | < 19                   | n.r.                                                                | n.a.              | 3 | CL |
| Results:               | Low number of social contacts             |                                            | Network position: isolate vs. member   |                        | <b>OR=1.55</b> (95% CI: 1.32–1.81); <i>k</i> =8; <i>N</i> =5,067    |                   |   |    |
|                        |                                           |                                            | Network position: isolated vs. liaison |                        | <b>OR=1.49</b> (95% CI: 1.07–2.07); <i>k</i> =8; <i>N</i> =5,067    |                   |   |    |
| Erzen & Çikrikci, 2018 | Loneliness                                | Depression                                 | Cross-sectional <sup>a</sup>           | Adults                 | up to 01.2018                                                       | n.r.              | 2 | CL |
| Results:               | Loneliness                                |                                            | Combined effect                        |                        | <i>r</i> =.50 (95% CI: .44–.55); <i>k</i> =88; <i>N</i> =40,068     |                   |   |    |
|                        |                                           |                                            | Sub-analysis: clinical populations     |                        | <i>r</i> =.54 (95% CI: .38–.67); <i>k</i> =10; <i>N</i> =n.r.       |                   |   |    |
|                        |                                           |                                            | Sub-analysis: other populations        |                        | <i>r</i> =.44 (95% CI: .16–.66); <i>k</i> =12; <i>N</i> =n.r.       |                   |   |    |
| Evans et al., 2018     | Low number of social contacts             | Cognitive functioning                      | Longitudinal                           | 50+                    | up to 01.2018                                                       | 2-24 years        | 4 | M  |
| Results:               | Low number of social contacts             |                                            | Combined effect                        |                        | <i>r</i> =.054 (95% CI: .043–.065); <i>k</i> =51; <i>N</i> =102,035 |                   |   |    |
|                        |                                           |                                            | Sub-analysis: global measures          |                        | <i>r</i> =.061 (95% CI: .044–.079); <i>k</i> =43; <i>N</i> =74,933  |                   |   |    |
|                        |                                           |                                            | Sub-analysis: memory                   |                        | <i>r</i> =.050 (95% CI: .028–.072); <i>k</i> =13; <i>N</i> =35,230  |                   |   |    |
|                        |                                           |                                            | Sub-analysis: executive functioning    |                        | <i>r</i> =.031 (95% CI: .015–.047); <i>k</i> =7; <i>N</i> =30,528   |                   |   |    |
| Kuiper et al., 2015    | Low number of social contacts, loneliness | Risk of dementia                           | Longitudinal                           | 60+                    | up to 07.2012                                                       | 2 to 15 years     | 3 | M  |
| Results:               | Low number of social contacts             |                                            | Low social network size                |                        | RR=1.17 (95% CI: 0.92–1.48); <i>k</i> =5; <i>N</i> =7,749           |                   |   |    |
|                        | Low number of social contacts             |                                            | Low level of participation             |                        | <b>RR=1.41</b> (95% CI: 1.13–1.75); <i>k</i> =6; <i>N</i> =7,687    |                   |   |    |
|                        | Low number of social contacts             |                                            | Low frequency of contacts              |                        | <b>RR=1.57</b> (95% CI: 1.32–1.85); <i>k</i> =8; <i>N</i> =15,762   |                   |   |    |
|                        | Loneliness                                |                                            | Feeling lonely                         |                        | <b>RR=1.58</b> (95% CI: 1.19–2.09); <i>k</i> =3; <i>N</i> =3,252    |                   |   |    |
|                        | Loneliness                                |                                            | Low satisfaction with social network   |                        | RR=1.25 (95% CI: 0.96–1.62); <i>k</i> =4; <i>N</i> =6,207           |                   |   |    |
| Lara et al., 2019      | Loneliness                                | Dementia & mild cognitive impairment       | Longitudinal                           | 50+                    | up to 11.2018                                                       | n.r.              | 6 | H  |
| Results:               | Loneliness                                |                                            | Combined effect                        |                        | <b>RR=1.26</b> (95% CI: 1.14–1.40); <i>k</i> =8; <i>N</i> =33,555   |                   |   |    |
| Maes et al., 2019      | Loneliness                                | Social anxiety in children/adolescents     | Cross-sectional & longitudinal         | 15.59 (4.27)           | 1981 – 06.2016                                                      | 1.25 to 72 months | 4 | CL |
| Results:               | Loneliness                                |                                            | Cross-sectional effects                |                        | <i>r</i> =.46 (95% CI: .43–.48); <i>k</i> =98; <i>N</i> =41,776     |                   |   |    |
|                        | Loneliness                                |                                            | Longitudinal/cross-lagged effects      |                        | <i>r</i> =.12 (95% CI: .04–.21); <i>k</i> =10; <i>N</i> =3,995      |                   |   |    |
| Mahon et al., 2006     | Loneliness                                | Depression & social anxiety in adolescence | Cross-sectional <sup>a</sup>           | Adolescents (11 to 23) | 1980 – 2004                                                         | n.r.              | 4 | CL |

|                                             |                                                         |                                         |                                |                 |                   |                                                                         |   |    |
|---------------------------------------------|---------------------------------------------------------|-----------------------------------------|--------------------------------|-----------------|-------------------|-------------------------------------------------------------------------|---|----|
| Results: Loneliness                         |                                                         | Depression                              |                                |                 |                   | <i>r</i> =.61 (n.r.); <i>k</i> =30; <i>N</i> =17,691                    |   |    |
| Loneliness                                  |                                                         | Sub-analysis: outliers removed          |                                |                 |                   | <i>r</i> =.55 (n.r.); <i>k</i> =18; <i>N</i> =6,058                     |   |    |
| Loneliness                                  |                                                         | Anxiety                                 |                                |                 |                   | <i>r</i> =.41 (n.r.); <i>k</i> =12; <i>N</i> =3,853                     |   |    |
| Loneliness                                  |                                                         | Sub-analysis: outliers removed          |                                |                 |                   | <i>r</i> =.35 (n.r.); <i>k</i> =10; <i>N</i> =2,705                     |   |    |
| Michalska da Rocha et al., 2018             | Loneliness                                              | Psychosis                               | Cross-sectional <sup>a</sup>   | Adults          | up to 02.2016     | n.r.                                                                    | 4 | H  |
| Results: Loneliness                         |                                                         | Combined effect                         |                                |                 |                   | <b><i>r</i>=.32</b> (95% CI: 0.20–0.44); <i>k</i> =13; <i>N</i> =15,647 |   |    |
| Penninkilampi et al., 2018                  | Living alone, Low number of social contacts, loneliness | Risk of dementia                        | Longitudinal & case-control    | 60+             | 01.2012 – 05.2017 | 5.9 years                                                               | 8 | L  |
| Results: Any type of poor social connection |                                                         | Combined effect                         |                                |                 |                   | <b>RR=1.41</b> (95% CI: 1.21–1.65); <i>k</i> =15; <i>N</i> =2,330,163   |   |    |
| Low number of social contacts               |                                                         | Combined effect                         |                                |                 |                   | <b>RR=1.59</b> (95% CI: 1.31–1.93); <i>k</i> =6; <i>N</i> =25,373       |   |    |
| Living alone                                |                                                         | Combined effect                         |                                |                 |                   | <b>RR=1.41</b> (95% CI: 1.07–1.84); <i>k</i> =4; <i>N</i> =5,401        |   |    |
| Loneliness                                  |                                                         | Combined effect                         |                                |                 |                   | RR=1.38 (95% CI: 0.98–1.94); <i>k</i> =4; <i>N</i> =4,698               |   |    |
| Teo et al., 2013                            | Living alone                                            | Social anxiety disorder                 | Cross-sectional <sup>a</sup>   | Adults (mainly) | 01.1980 - 02.2011 | n.r.                                                                    | 4 | M  |
| Results: Living alone                       |                                                         | Combined effect                         |                                |                 |                   | <b>OR=1.73</b> (95% CI: 1.34–2.24); <i>k</i> =4; <i>N</i> =12,831       |   |    |
|                                             |                                                         | Sub-analysis: large survey studies      |                                |                 |                   | <b>OR=1.70</b> (95% CI: 1.38–2.10); <i>k</i> =3; <i>N</i> =12,773       |   |    |
| Xiu-Ying et al., 2012                       | Living alone                                            | Late life depression                    | Cross-sectional & longitudinal | 55+             | 1966 - 08.2007    | n.r.                                                                    | 3 | CL |
| Results: Living alone                       |                                                         | Cross-sectional effects                 |                                |                 |                   | <b>OR=1.44</b> (95% CI: 1.04–1.99); <i>k</i> =16; <i>N</i> =34,090      |   |    |
| Living alone                                |                                                         | Sub-analysis: vs. living with family    |                                |                 |                   | <b>OR=2.59</b> (95% CI: 1.60–4.20); <i>k</i> =5; <i>N</i> =12,537       |   |    |
| Living alone                                |                                                         | Longitudinal/cross-lagged effects       |                                |                 |                   | RR=1.27 (95% CI: 0.89–1.80); <i>k</i> =4; <i>N</i> =1,345               |   |    |
| Yuan et al., 2019                           | Living alone                                            | Post-acute coronary syndrome depression | Longitudinal & case-control    | 19+             | 01.1996 - 03.2018 | n.r.                                                                    | 4 | L  |
| Results: Living alone                       |                                                         | Combined effect                         |                                |                 |                   | <b>OR=1.17</b> (95% CI: 1.12–1.22); <i>k</i> =11; <i>N</i> =n.r.        |   |    |

Note: For each result, we specify the type of social connection, the focus of the (sub-)analysis, followed by the reported effect size (in brackets: confidence intervals), as well as included numbers of independent studies and participants. Effect sizes printed in boldface are statistically significant at alpha = 0.05. Abbreviations: n.a.: not applicable; n.r.: not reported; H: High; M: Moderate; L: Low; CL: Critically low.

<sup>a</sup> These studies included different study designs and extracted cross-sectional data or aggregated longitudinal and cross-sectional data.

1  
2  
3 All publications were journal articles in English. Ten meta-analyses reported  
4  
5 associations of number of social contacts, living alone, and loneliness with physical  
6  
7 health outcomes, and 15 with mental health outcomes. Different indicators of social  
8  
9 isolation were measured in the included studies. We considered as indicators a *low*  
10  
11 *number of social contacts* defined as an objectively quantifiable variable of one's  
12  
13 social contacts irrespective of its perceived quality; *loneliness* representing the  
14  
15 subjective emotional appraisal of the extent and quality of social relationships; and  
16  
17 *living alone* as an objective characteristic of the living situation. The meta-analyses  
18  
19 differed with respect to whether they kept these three measures of social isolation  
20  
21 separate of whether they combined them (see Tab. 1).  
22  
23  
24  
25

#### 26 Figure 1 & Table 1

27  
28 A total of 276 primary studies were included in the 10 meta-analyses on  
29  
30 physical health. The reported results in Table 1 were based on sample sizes ranging  
31  
32 from 1,451<sup>11</sup> to 113,374<sup>12</sup> participants, with three meta-analyses not reporting on the  
33  
34 sample size. Four meta-analyses were based on longitudinal studies only, one on  
35  
36 cross-sectional studies only, and the remaining five on a combination of both cross-  
37  
38 sectional and longitudinal studies. Only one of these studies was conducted with  
39  
40 children and adolescents.<sup>13</sup> The meta-analyses revealed that there is a significant  
41  
42 association between social isolation and the following health problems: chronic  
43  
44 physical complaints in children and adolescents,<sup>13</sup> cardiovascular disease,<sup>14</sup> coronary  
45  
46 heart disease and stroke,<sup>15</sup> and frailty in older male (but not female) adults.<sup>12</sup>  
47  
48  
49 Additionally, social isolation was associated with early mortality,<sup>7,16</sup> malnutrition,<sup>17</sup>  
50  
51 hospital readmission in heart failure patients,<sup>18</sup> and vaccine uptake amongst older  
52  
53 adults.<sup>19</sup> One meta-analysis<sup>11</sup> reported mostly non-significant results on a positive  
54  
55  
56  
57  
58  
59  
60



1  
2  
3 association between social isolation and inflammation (acute-phase C-reactive protein  
4 and fibrinogen).  
5  
6

7  
8 The 15 meta-analyses on mental health were based on a total of 416 primary  
9  
10 studies. The reported results are based on sample sizes ranging from 1,345<sup>20</sup> to  
11  
12 2,330,163<sup>21</sup> participants, with one meta-analysis failing to report on the sample size.  
13  
14 Four of the 15 meta-analyses provided longitudinal data only, one provided cross-  
15  
16 sectional data only, and the remaining ten meta-analyses reported on both cross-  
17  
18 sectional and longitudinal studies. Three meta-analyses focused on studies with  
19  
20 children and adolescents.<sup>22-24</sup> The included meta-analyses reported a positive  
21  
22 association between social isolation and late-life suicidal ideation,<sup>25</sup> depression in  
23  
24 adults,<sup>26,27</sup> late life depression,<sup>20</sup> psychosis,<sup>22,28,29</sup> smoking behavior in adolescents,<sup>23</sup>  
25  
26 dementia and cognitive impairment in later life,<sup>30-32,21</sup> depression and social anxiety in  
27  
28 childhood and adolescence,<sup>22,24</sup> social anxiety disorder in adults,<sup>33</sup> and post-acute  
29  
30 coronary syndrome depression.<sup>34</sup> See Table 1 for detailed information.  
31  
32  
33  
34

### 35 Study quality

36  
37 The Intraclass Correlation Coefficient (ICC) of the global quality ratings among the  
38  
39 two raters was .83, 95% CI = .62 – .93, indicating good inter-rater reliability. Study  
40  
41 quality was very heterogeneous among meta-analyses both on physical and mental  
42  
43 health (see Tab. 1). With respect to the meta-analyses on physical health, the global  
44  
45 rating was high in 40%, medium in 10%, low in 40%, critically low in 10% of the  
46  
47 meta-analyses. In the 15 meta-analyses on mental health, study quality was rated as  
48  
49 high in 13%, medium in 27%, low in 27%, and critically low in 33% of the meta-  
50  
51 analyses. Among the AMSTAR-2 criteria, inadequate assessment of risk of bias  
52  
53 and/or lack of consideration of risk of bias represented the most frequent critical  
54  
55 weaknesses of included meta-analyses.  
56  
57  
58  
59  
60

## Discussion

The review clearly demonstrates that social isolation is associated with poorer health. This applies to a range of physical and mental health outcomes and has been found in different populations and contexts. The evidence is substantial for physical health outcome and even more extensive for mental health outcomes. More specifically, social isolation is linked with chronic physical symptoms, frailty, coronary heart disease, stroke, early mortality, malnutrition, hospital readmission in heart failure patients, and vaccine uptake. With respect to mental health, social isolation is linked with depression in young and adult populations, social anxiety, psychosis, dementia and cognitive impairment in later life, and late-life suicidal ideation.

## Strengths and limitations

This is, to our knowledge, the first review to synthesize the existing evidence that has been reported in meta-analyses on the link between social isolation and physical and mental health outcomes. The findings reflect a reasonable number of meta-analyses which in total included 692 studies. Thus, the overall conclusions of this umbrella review are based on an extensive body of empirical evidence.

However, the review also has several limitations. Firstly, we considered different indicators of social isolation, and our method did not allow us to identify whether one indicator is more relevant than another. Secondly, half of the included meta-analyses for both physical and mental health outcomes had an overall quality rated on AMSTAR-2 as low or critically low, with inadequate consideration of risk of bias being the most frequent critical flaw. Thirdly, the quality of the primary research studies that went into the included meta-analyses also varied and their different

1  
2  
3 methodological shortcomings cannot be adequately considered in this review. Finally,  
4  
5 the review included a wide range of health outcomes and did not quantify the strength  
6  
7 of the associations for different outcomes.  
8  
9

## 12 Implications

15 The review leaves little doubt that social isolation is linked with poorer physical and  
16  
17 mental health. However, the findings are all based on observational studies and do not  
18  
19 provide evidence on the causal direction of the association. Poor physical and mental  
20  
21 health can lead to social isolation, and social isolation can lead to poorer health. For  
22  
23 establishing a causal relationship experimental studies are required, which were not  
24  
25 the subject of this review. Some evidence from randomized controlled trials, however,  
26  
27 suggests that expanding the social connections of individuals, e.g., through  
28  
29 befriending programs, may indeed improve different health outcomes.<sup>35</sup> For most of  
30  
31 the considered outcomes, a causal effect of social isolation is plausible and likely to  
32  
33 explain at least part of the identified associations. The casual direction is definite in  
34  
35 case of the greater risk of isolated people to die early.<sup>7</sup> For an explanation of the  
36  
37 damaging effect of social isolation on health outcomes, one may refer to different  
38  
39 theoretical models. Theorists from different perspectives have postulated that the  
40  
41 impact of social isolation on health is mediated by impairments in social capital,<sup>36</sup>  
42  
43 social control,<sup>37</sup> social identification,<sup>38</sup> and social support.<sup>39</sup>  
44  
45  
46  
47  
48

49 All the included studies assessed social isolation as it occurs in a normal  
50  
51 societal context. Social distancing as part of measures to limit the spread of COVID-  
52  
53 19 is different from the situations considered in the research synthesized in this  
54  
55 review. Firstly, for the vast majority of the population, the required social distancing  
56  
57 leads to a much more pronounced social isolation than what they have experienced  
58  
59  
60

1  
2  
3 before. Secondly, social distancing is externally imposed and not due to individual  
4  
5 life style decisions, lack of material means, poor social skills or other barriers to  
6  
7 socialize. And thirdly, social distancing is requested from people in an overall context  
8  
9 of uncertainty that comes with further stressors, health risks, and often a reduced  
10  
11 accessibility of health care.  
12  
13

14  
15 It is important to note that social distancing is a broad umbrella term that  
16  
17 incorporates a wide range of potential measures, with highly divergent implications  
18  
19 for social routines. It can include a full lock down and curfew, specific guidelines for  
20  
21 meetings and gatherings of people, physical distancing in public, and a recommended  
22  
23 or mandatory wearing of face masks. The type, degree, and duration of social  
24  
25 distancing measures have been variable across countries and will affect how isolated  
26  
27 different groups in the population become.  
28  
29

30  
31 One can only speculate as to whether and, if so, to what extent the increased  
32  
33 social isolation resulting from social distancing measures in the current situation will  
34  
35 have an even greater impact on health outcomes than has been suggested in this  
36  
37 review. Arguably, an even greater impact can be expected for certain risk groups,  
38  
39 such as older people who are more threatened by COVID-19 and socially  
40  
41 disadvantaged groups who often face even more economic adversity than before the  
42  
43 pandemic. Further research is required to identify which populations are at particular  
44  
45 risk to suffer health problems as a result of social distancing and to explore whether  
46  
47 the resulting social isolation may – at least to some extent and in some people – be  
48  
49 compensated through positive effects of the pandemic, such as strengthened local  
50  
51 communities and increased options for online social activities.<sup>40</sup>  
52  
53  
54  
55  
56  
57  
58  
59  
60

## Conclusions

In governmental decisions about future social distancing measures, a potential negative impact of the resulting social isolation on the health of the population needs to be considered. This review suggests that this can affect both physical and mental health outcomes and include an excess mortality. To what extent the presumed impact of social distancing on health outcomes can be balanced with its benefits in curbing the impact of COVID-19 is ultimately a governmental decision based on values as much as on evidence.

1  
2  
3 **Figure Captions:** Fig.1. Flow diagram of study selection process.  
4  
5

6 ---

7 **Acknowledgements:** Not applicable.  
8  
9

10 **Report about dual (co-)authorship:** No authors co-authored any of the systematic  
11 reviews and meta-analyses included in our overview.  
12  
13

14  
15 **Authors' Contributions:** NM had full access to all of the data in the study and takes  
16 responsibility for the integrity of the data and the accuracy of the data analysis.  
17 NM designed the search strategy with input from AK and TM. NM and AK carried  
18 out the literature searches and screening. NM, THH, and TM carried out the data  
19 extraction. AK and TM assessed the quality of the included meta-analyses. NM and  
20 SP wrote the first draft of the manuscript and all authors contributed to and have  
21 approved the final manuscript.  
22  
23  
24  
25  
26  
27  
28

29 **Funding/Support:** No funding received.  
30  
31

32 **Conflict of Interest Disclosures:** Not applicable.  
33  
34  
35

36 **Availability of data and materials:** All data generated or analysed during this study  
37 are included in this published article and supplementary material.  
38

39 Ethics approval and consent to participate: This study did not require ethical approval.  
40  
41  
42

43 **Consent for publication:** Not applicable.  
44  
45

46 **Patient and Public Involvement statement:** Not applicable.  
47  
48  
49  
50  
51  
52  
53  
54  
55  
56  
57  
58  
59  
60

## References

1. Perissinotto CM, Covinsky KE. Living alone, socially isolated or lonely - what are we measuring? *Journal of General Internal Medicine*. 2014;29(11):1429-1431.
2. Holt-Lunstad J. Why Social Relationships Are Important for Physical Health: A Systems Approach to Understanding and Modifying Risk and Protection. *Annu Rev Psychol*. 2018;69:437-458. doi:10.1146/annurev-psych-122216-011902.
3. Cacioppo JT, Cacioppo S, Capitanio JP, Cole SW. The neuroendocrinology of social isolation. *Annu Rev Psychol*. 2015;66:733-767.
4. Seeman TE, Singer BH, Ryff CD, Love GD, Levy-Storms L. Social relationships, gender, and allostatic load across two age cohorts. *Psychosomatic medicine*. 2002;64(3):395-406.
5. Hawkey LC, Capitanio JP. Perceived social isolation, evolutionary fitness and health outcomes: a lifespan approach. *Philosophical Transactions of the Royal Society B: Biological Sciences*. 2015;370(1669):20140114.
6. Grant N, Hamer M, Steptoe A. Social isolation and stress-related cardiovascular, lipid, and cortisol responses. *Annals of Behavioral Medicine*. 2009;37(1):29-37.
7. Holt-Lunstad J, Smith TB, Baker M, Harris T, Stephenson D. Loneliness and social isolation as risk factors for mortality: a meta-analytic review. *Perspect Psychol Sci*. 2015;10(2):227-237. doi:10.1177/1745691614568352.
8. Tricco AC, Langlois EV, Straus SE, others. *Rapid reviews to strengthen health policy and systems: a practical guide*. World Health Organization Geneva; 2017.
9. Moher D, Liberati A, Tetzlaff J, Altman DG. Preferred reporting items for systematic reviews and meta-analyses: the PRISMA statement. *Ann Intern Med*. 2009;151(4):264-269.
10. Shea BJ, Reeves BC, Wells G, et al. AMSTAR 2: a critical appraisal tool for systematic reviews that include randomised or non-randomised studies of healthcare interventions, or both. *BMJ*. 2017;358:j4008.
11. Smith KJ, Gavey S, Riddell NE, Kontari P, Victor C. The association between loneliness, social isolation and inflammation: A systematic review and meta-analysis. *Neurosci Biobehav Rev*. 2020;112:519-541. doi:10.1016/j.neubiorev.2020.02.002.

12. Kojima G, Taniguchi Y, Kitamura A, Fujiwara Y. Is living alone a risk factor of frailty? A systematic review and meta-analysis. *Ageing Res Rev.* 2020;59:101048. doi:10.1016/j.arr.2020.101048.
13. Maes M, van den Noortgate W, Fustolo-Gunnink SF, Rassart J, Luyckx K, Goossens L. Loneliness in Children and Adolescents With Chronic Physical Conditions: A Meta-Analysis. *J Pediatr Psychol.* 2017;42(6):622-635. doi:10.1093/jpepsy/jsx046.
14. Steptoe A, Kivimäki M. Stress and cardiovascular disease: an update on current knowledge. *Annu Rev Public Health.* 2013;34:337-354. doi:10.1146/annurev-publhealth-031912-114452.
15. Valtorta NK, Kanaan M, Gilbody S, Ronzi S, Hanratty B. Loneliness and social isolation as risk factors for coronary heart disease and stroke: systematic review and meta-analysis of longitudinal observational studies. *Heart.* 2016;102(13):1009-1016.
16. Rico-Urbe LA, Caballero FF, Martín-María N, Cabello M, Ayuso-Mateos JL, Miret M. Association of loneliness with all-cause mortality: A meta-analysis. *PLoS ONE.* 2018;13(1):e0190033. doi:10.1371/journal.pone.0190033.
17. Besora-Moreno M, Llauradó E, Tarro L, Solà R. Social and Economic Factors and Malnutrition or the Risk of Malnutrition in the Elderly: A Systematic Review and Meta-Analysis of Observational Studies. *Nutrients.* 2020;12(3). doi:10.3390/nu12030737.
18. Heidari Gorji MA, Fatahian A, Farsavian A. The impact of perceived and objective social isolation on hospital readmission in patients with heart failure: A systematic review and meta-analysis of observational studies. *Gen Hosp Psychiatry.* 2019;60:27-36. doi:10.1016/j.genhosppsych.2019.07.002.
19. Jain A, van Hoek AJ, Boccia D, Thomas SL. Lower vaccine uptake amongst older individuals living alone: A systematic review and meta-analysis of social determinants of vaccine uptake. *Vaccine.* 2017;35(18):2315-2328. doi:10.1016/j.vaccine.2017.03.013.
20. Xiu-Ying H, Qian C, Xiao-Dong P, Xue-Mei Z, Chang-Quan H. Living arrangements and risk for late life depression: a meta-analysis of published literature. *Int J Psychiatry Med.* 2012;43(1):19-34. doi:10.2190/PM.43.1.b.
21. Penninkilampi R, Casey A-N, Singh MF, Brodaty H. The Association between Social Engagement, Loneliness, and Risk of Dementia: A Systematic Review and



- 1  
2  
3 Meta-Analysis. *J Alzheimers Dis*. 2018;66(4):1619-1633. doi:10.3233/JAD-  
4 180439.  
5  
6  
7 22. Maes M, Nelemans SA, Danneel S, et al. Loneliness and social anxiety across  
8 childhood and adolescence: Multilevel meta-analyses of cross-sectional and  
9 longitudinal associations. *Dev Psychol*. 2019;55(7):1548-1565.  
10 doi:10.1037/dev0000719.  
11  
12  
13 23. Choi HJ, Smith RA. Members, isolates, and liaisons: meta-analysis of adolescents'  
14 network positions and their smoking behavior. *Subst Use Misuse*. 2013;48(8):612-  
15 622. doi:10.3109/10826084.2013.800111.  
16  
17  
18 24. Mahon NE, Yarcheski A, Yarcheski TJ, Cannella BL, Hanks MM. A meta-  
19 analytic study of predictors for loneliness during adolescence. *Nursing Research*.  
20 2006;55(5):308-315.  
21  
22  
23 25. Chang Q, Chan CH, Yip PSF. A meta-analytic review on social relationships and  
24 suicidal ideation among older adults. *Soc Sci Med*. 2017;191:65-76.  
25 doi:10.1016/j.socscimed.2017.09.003.  
26  
27  
28 26. Chatterjee A, Banerjee S, Stein C, Kim M-H, DeFerio J, Pathak J. Risk Factors for  
29 Depression Among Civilians After the 9/11 World Trade Center Terrorist Attacks:  
30 A Systematic Review and Meta-Analysis. *PLoS Curr*. 2018;10.  
31 doi:10.1371/currents.dis.6a00b40c8ace0a6a0017361d7577c50a.  
32  
33  
34 27. Erzen E, Çikrikci Ö. The effect of loneliness on depression: A meta-analysis. *Int J*  
35 *Soc Psychiatry*. 2018;64(5):427-435. doi:10.1177/0020764018776349.  
36  
37  
38 28. Michalska da Rocha B, Rhodes S, Vasilopoulou E, Hutton P. Loneliness in  
39 Psychosis: A Meta-analytical Review. *Schizophr Bull*. 2018;44(1):114-125.  
40 doi:10.1093/schbul/sbx036.  
41  
42  
43 29. Chau AKC, Zhu C, So SH-W. Loneliness and the psychosis continuum: a meta-  
44 analysis on positive psychotic experiences and a meta-analysis on negative  
45 psychotic experiences. *Int Rev Psychiatry*. 2019;31(5-6):471-490.  
46 doi:10.1080/09540261.2019.1636005.  
47  
48  
49 30. Evans IEM, Martyr A, Collins R, Brayne C, Clare L. Social Isolation and  
50 Cognitive Function in Later Life: A Systematic Review and Meta-Analysis. *J*  
51 *Alzheimers Dis*. 2019;70(s1):S119-S144. doi:10.3233/JAD-180501.  
52  
53  
54 31. Lara E, Martín-María N, La Torre-Luque A de, et al. Does loneliness contribute to  
55 mild cognitive impairment and dementia? A systematic review and meta-analysis  
56  
57  
58  
59  
60

- 1  
2  
3 of longitudinal studies. *Ageing Res Rev.* 2019;52:7-16.  
4  
5 doi:10.1016/j.arr.2019.03.002.  
6  
7 32. Kuiper JS, Zuidersma M, Oude Voshaar RC, et al. Social relationships and risk of  
8 dementia: A systematic review and meta-analysis of longitudinal cohort studies.  
9  
10 *Ageing Res Rev.* 2015;22:39-57. doi:10.1016/j.arr.2015.04.006.  
11  
12 33. Teo AR, Lerrigo R, Rogers MAM. The role of social isolation in social anxiety  
13 disorder: a systematic review and meta-analysis. *J Anxiety Disord.*  
14  
15 2013;27(4):353-364. doi:10.1016/j.janxdis.2013.03.010.  
16  
17 34. Yuan M-Z, Fang Q, Liu G-W, Zhou M, Wu J-M, Pu C-Y. Risk Factors for Post-  
18 Acute Coronary Syndrome Depression: A Meta-analysis of Observational Studies.  
19  
20 *J Cardiovasc Nurs.* 2019;34(1):60-70. doi:10.1097/JCN.0000000000000520.  
21  
22 35. Siette J, Cassidy M, Priebe S. Effectiveness of befriending interventions: a  
23  
24 systematic review and meta-analysis. *BMJ open.* 2017;7(4):e014304.  
25  
26 36. Szreter S, Woolcock M. Health by association? Social capital, social theory, and  
27  
28 the political economy of public health. *International journal of epidemiology.*  
29  
30 2004;33(4):650-667.  
31  
32 37. Craddock E, vanDellen MR, Novak SA, Ranby KW. Influence in relationships: A  
33  
34 meta-analysis on health-related social control. *Basic and Applied Social*  
35  
36 *Psychology.* 2015;37(2):118-130.  
37  
38 38. Postmes T, Wichmann LJ, van Valkengoed AM, van der Hoef H. Social  
39  
40 identification and depression: A meta-analysis. *European journal of social*  
41  
42 *psychology.* 2019;49(1):110-126.  
43  
44 39. Uchino BN, Bowen K, Grey RK de, Mikel J, Fisher EB. Social support and  
45  
46 physical health: Models, mechanisms, and opportunities. In: *Principles and*  
47  
48 *concepts of behavioral medicine.* Springer; 2018:341-372.  
49  
50 40. Steffens NK, LaRue CJ, Haslam C, et al. Social identification-building  
51  
52 interventions to improve health: A systematic review and meta-analysis. *Health*  
53  
54 *Psychology Review.* 2019:1-28.  
55  
56  
57  
58  
59  
60

1  
2  
3  
4  
5  
6  
7  
8  
9  
10  
11  
12  
13  
14  
15  
16  
17  
18  
19  
20  
21  
22  
23  
24  
25  
26  
27  
28  
29  
30  
31  
32  
33  
34  
35  
36  
37  
38  
39  
40  
41  
42  
43  
44  
45  
46  
47  
48  
49  
50  
51  
52  
53  
54  
55  
56  
57  
58  
59  
60

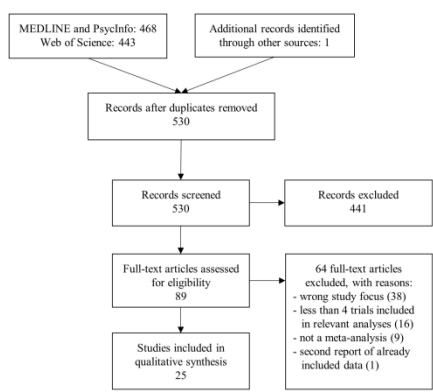

Fig. 1. Flow diagram of study selection process

338x190mm (300 x 300 DPI)

## MOOSE (Meta-analyses Of Observational Studies in Epidemiology) Checklist

A reporting checklist for Authors, Editors, and Reviewers of Meta-analyses of Observational Studies. You must report the page number in your manuscript where you consider each of the items listed in this checklist. If you have not included this information, either revise your manuscript accordingly before submitting or note N/A.

| Reporting Criteria                                                                                              | Reported (Yes/No) | Reported on Page No. |
|-----------------------------------------------------------------------------------------------------------------|-------------------|----------------------|
| <b>Reporting of Background</b>                                                                                  |                   |                      |
| Problem definition                                                                                              |                   |                      |
| Hypothesis statement                                                                                            |                   |                      |
| Description of Study Outcome(s)                                                                                 |                   |                      |
| Type of exposure or intervention used                                                                           |                   |                      |
| Type of study design used                                                                                       |                   |                      |
| Study population                                                                                                |                   |                      |
| <b>Reporting of Search Strategy</b>                                                                             |                   |                      |
| Qualifications of searchers (eg, librarians and investigators)                                                  |                   |                      |
| Search strategy, including time period included in the synthesis and keywords                                   |                   |                      |
| Effort to include all available studies, including contact with authors                                         |                   |                      |
| Databases and registries searched                                                                               |                   |                      |
| Search software used, name and version, including special features used (eg, explosion)                         |                   |                      |
| Use of hand searching (eg, reference lists of obtained articles)                                                |                   |                      |
| List of citations located and those excluded, including justification                                           |                   |                      |
| Method for addressing articles published in languages other than English                                        |                   |                      |
| Method of handling abstracts and unpublished studies                                                            |                   |                      |
| Description of any contact with authors                                                                         |                   |                      |
| <b>Reporting of Methods</b>                                                                                     |                   |                      |
| Description of relevance or appropriateness of studies assembled for assessing the hypothesis to be tested      |                   |                      |
| Rationale for the selection and coding of data (eg, sound clinical principles or convenience)                   |                   |                      |
| Documentation of how data were classified and coded (eg, multiple raters, blinding, and interrater reliability) |                   |                      |
| Assessment of confounding (eg, comparability of cases and controls in studies where appropriate)                |                   |                      |

| Reporting Criteria                                                                                                                                                                                                                                                           | Reported (Yes/No) | Reported on Page No. |
|------------------------------------------------------------------------------------------------------------------------------------------------------------------------------------------------------------------------------------------------------------------------------|-------------------|----------------------|
| Assessment of study quality, including blinding of quality assessors; stratification or regression on possible predictors of study results                                                                                                                                   |                   |                      |
| Assessment of heterogeneity                                                                                                                                                                                                                                                  |                   |                      |
| Description of statistical methods (eg, complete description of fixed or random effects models, justification of whether the chosen models account for predictors of study results, dose-response models, or cumulative meta-analysis) in sufficient detail to be replicated |                   |                      |
| Provision of appropriate tables and graphics                                                                                                                                                                                                                                 |                   |                      |
| <b>Reporting of Results</b>                                                                                                                                                                                                                                                  |                   |                      |
| Table giving descriptive information for each study included                                                                                                                                                                                                                 |                   |                      |
| Results of sensitivity testing (eg, subgroup analysis)                                                                                                                                                                                                                       |                   |                      |
| Indication of statistical uncertainty of findings                                                                                                                                                                                                                            |                   |                      |
| <b>Reporting of Discussion</b>                                                                                                                                                                                                                                               |                   |                      |
| Quantitative assessment of bias (eg, publication bias)                                                                                                                                                                                                                       |                   |                      |
| Justification for exclusion (eg, exclusion of non-English-language citations)                                                                                                                                                                                                |                   |                      |
| Assessment of quality of included studies                                                                                                                                                                                                                                    |                   |                      |
| <b>Reporting of Conclusions</b>                                                                                                                                                                                                                                              |                   |                      |
| Consideration of alternative explanations for observed results                                                                                                                                                                                                               |                   |                      |
| Generalization of the conclusions (ie, appropriate for the data presented and within the domain of the literature review)                                                                                                                                                    |                   |                      |
| Guidelines for future research                                                                                                                                                                                                                                               |                   |                      |
| Disclosure of funding source                                                                                                                                                                                                                                                 |                   |                      |

Once you have completed this checklist, please save a copy and upload it as part of your submission. DO NOT include this checklist as part of the main manuscript document. It must be uploaded as a separate file.

# BMJ Open

## A potential impact of physical distancing on physical and mental health. A rapid narrative umbrella review of meta-analyses on the link between social isolation and health

|                                 |                                                                                                                                                                                                                                                                                                                                              |
|---------------------------------|----------------------------------------------------------------------------------------------------------------------------------------------------------------------------------------------------------------------------------------------------------------------------------------------------------------------------------------------|
| Journal:                        | <i>BMJ Open</i>                                                                                                                                                                                                                                                                                                                              |
| Manuscript ID                   | bmjopen-2020-042335.R1                                                                                                                                                                                                                                                                                                                       |
| Article Type:                   | Original research                                                                                                                                                                                                                                                                                                                            |
| Date Submitted by the Author:   | 04-Oct-2020                                                                                                                                                                                                                                                                                                                                  |
| Complete List of Authors:       | Morina, Nexhmedin ; University of Münster, Psychology<br>Kip, Ahlke; University of Münster, Psychology<br>Hoppen, Thole; University of Münster, Psychology<br>Priebe, Stefan; Queen Mary University of London Faculty of Medicine and Dentistry, Unit of Social and Community Psychiatry<br>Meyer, Thomas; University of Münster, Psychology |
| <b>Primary Subject Heading</b>: | Global health                                                                                                                                                                                                                                                                                                                                |
| Secondary Subject Heading:      | Global health                                                                                                                                                                                                                                                                                                                                |
| Keywords:                       | PUBLIC HEALTH, Health policy < HEALTH SERVICES ADMINISTRATION & MANAGEMENT, Risk management < HEALTH SERVICES ADMINISTRATION & MANAGEMENT, MENTAL HEALTH, Health & safety < HEALTH SERVICES ADMINISTRATION & MANAGEMENT                                                                                                                      |
|                                 |                                                                                                                                                                                                                                                                                                                                              |

SCHOLARONE™  
Manuscripts



I, the Submitting Author has the right to grant and does grant on behalf of all authors of the Work (as defined in the below author licence), an exclusive licence and/or a non-exclusive licence for contributions from authors who are: i) UK Crown employees; ii) where BMJ has agreed a CC-BY licence shall apply, and/or iii) in accordance with the terms applicable for US Federal Government officers or employees acting as part of their official duties; on a worldwide, perpetual, irrevocable, royalty-free basis to BMJ Publishing Group Ltd ("BMJ") its licensees and where the relevant Journal is co-owned by BMJ to the co-owners of the Journal, to publish the Work in this journal and any other BMJ products and to exploit all rights, as set out in our [licence](#).

The Submitting Author accepts and understands that any supply made under these terms is made by BMJ to the Submitting Author unless you are acting as an employee on behalf of your employer or a postgraduate student of an affiliated institution which is paying any applicable article publishing charge ("APC") for Open Access articles. Where the Submitting Author wishes to make the Work available on an Open Access basis (and intends to pay the relevant APC), the terms of reuse of such Open Access shall be governed by a Creative Commons licence – details of these licences and which [Creative Commons](#) licence will apply to this Work are set out in our licence referred to above.

Other than as permitted in any relevant BMJ Author's Self Archiving Policies, I confirm this Work has not been accepted for publication elsewhere, is not being considered for publication elsewhere and does not duplicate material already published. I confirm all authors consent to publication of this Work and authorise the granting of this licence.

1  
2  
3  
4  
5  
6  
7  
8 **A potential impact of physical distancing on physical and mental health. A rapid**  
9  
10 **narrative umbrella review of meta-analyses on the link between social isolation**  
11  
12 **and health**  
13  
14  
15  
16

17 Nexhmedin Morina, Ph.D.<sup>1</sup>, Ahlke Kip, M.Sc.<sup>1</sup>, Thole H. Hoppen, Ph.D.<sup>1</sup>, Stefan  
18 Priebe, FRCPsych<sup>2</sup>, Thomas Meyer, Ph.D.<sup>1</sup>  
19  
20  
21  
22

23  
24 <sup>1</sup> Institute of Psychology, University of Münster, Münster, Germany  
25

26 <sup>2</sup> Unit for Social and Community Psychiatry, Queen Mary University of London,  
27 London, UK  
28  
29  
30  
31  
32  
33  
34  
35  
36  
37

38 Short Title: Social isolation and physical and mental health  
39

40 Word count (text only): 3471  
41  
42  
43  
44

45 \* Corresponding Author  
46

47 Nexhmedin Morina, Ph.D.  
48

49 Institute of Psychology  
50

51 University of Münster  
52

53 Fliegerstr. 21, 48149 Münster, Germany  
54

55 e-Mail: [morina@uni-muenster.de](mailto:morina@uni-muenster.de)  
56  
57  
58  
59  
60



## Abstract

**Background:** The imperative for physical distancing during the coronavirus disease 2019 (COVID-19) pandemic may deteriorate physical and mental health. We aimed at summarizing the strength of evidence in the published literature on the association of social isolation and loneliness with physical and mental health.

**Methods:** We conducted a systematic search in April 2020 to identify meta-analyses using the Medline, PsycINFO, and Web of Science databases. The search strategy included terms of social isolation, loneliness, living alone, and meta-analysis. Eligible meta-analyses needed to report any sort of association between an indicator of social isolation and any physical or mental health outcome. The findings were summarized in a narrative synthesis.

**Results:** Twenty-five meta-analyses met our criteria, of which 10 focused on physical health and 15 on mental health outcomes. A total of more than 3 million individuals had participated in the 692 primary studies. The results suggest that social isolation is associated with chronic physical symptoms, frailty, coronary heart disease, malnutrition, hospital readmission, reduced vaccine uptake, early mortality, depression, social anxiety, psychosis, cognitive impairment in later life, and suicidal ideation.

**Conclusions:** The existing evidence clearly indicates that social isolation is associated with a range of poor physical and mental health outcomes. A potential negative impact on these outcomes needs to be considered in future decisions on physical distancing measures.

**Keywords:** Social isolation, loneliness, physical health, mental health, disease.

**Strengths and limitations of this study:**

- This rapid umbrella review focuses on a timely and societally relevant issue.
- The systematic literature search was conducted in three major databases from inception up to April 2020 warranting an extensive and up-to-date overview on relevant meta-analyses in the field.
- Quality of included meta-analyses was rated with a standardized measure.
- Different indicators of social isolation were included.
- The utilized method did not allow for a quantitative comparison of associations with health outcomes.

## Background

The coronavirus 2019 (COVID-19) pandemic poses a global public health threat. In order to slow the spread of the virus by reducing contact rates, governments around the world have taken unprecedented political decisions that have transformed societies. The exact form and extent of these measures have varied, but they always include some type of physical distancing (mostly referred to as social distancing) making it impossible for people to maintain their normal social life.

In many countries, the restrictions have already been in place for several months. Depending on the further course of the pandemic with potential new waves, restrictions might continue for longer periods of time or be re-imposed after periods of loosening or abandoning them. When deciding about imposing, continuing or relaxing measures of physical distancing, governments have to consider and balance different risks. Whilst physical distancing is likely to reduce the risk of spreading the virus, it might generate other risks. These include potential damages to the economy and also possible negative consequences for the health of the population. For a balanced decision on further physical distancing measures, evidence is required on whether the measures are likely to impact on a range of health outcomes.

A recent general population survey revealed that physical distancing can increase social isolation and loneliness.<sup>1</sup> This may happen when people are prevented from travelling, physical meetings with significant others, and in some cases even from leaving their home other than for essential activities. Of note, some individuals can be physically isolated and not feel lonely and others can feel lonely even if they are not isolated. Furthermore, many individuals are able to remain socially connected by means of remote communication while physically isolated. Accordingly, we should not assume that physical distancing inevitably leads to social isolation and

1  
2  
3 loneliness. However, physical distancing is likely to have a disproportionate effect on  
4 those most vulnerable, in particular older adults, individuals in need of intensive  
5 physical or mental health care, and individuals with limited access to technology who  
6 lack the means of engaging in creative forms of contact with loved ones. Older  
7 patients, for example, may lose access to important parts of their usual routine (e.g.,  
8 day care programs or informal gatherings with significant others). Similarly,  
9 caregivers residing with patients need also to physically isolate themselves due to the  
10 ramifications of quarantines.  
11  
12  
13  
14  
15  
16  
17  
18  
19  
20

21 Social isolation is a broad term without a consistent definition in the literature.  
22 Three indicators of social isolation (also referred to as social connections) are  
23 commonly used in research: few social network ties, living alone, and loneliness.<sup>2-4</sup>  
24 Social network ties is a behavioral measure that can – at least in theory – be  
25 objectively quantified. Living alone describes a basic characteristic of an individual's  
26 social situation which can be associated with reduced social relationships, but is not  
27 necessarily so.<sup>5</sup> Loneliness, on the other hand, is an individual's subjective  
28 assessment of the quality and quantity of their social relationships, reflecting a belief  
29 that they have too few or too poor relationships, or both. Accordingly, social network  
30 ties and living alone represent structural indicators, whereas loneliness represents a  
31 quality measure of social connections.<sup>4,5</sup>  
32  
33  
34  
35  
36  
37  
38  
39  
40  
41  
42  
43  
44  
45  
46

47 Although these three indicators capture distinct aspects of social isolation,  
48 they commonly overlap and are associated with each other. Literature suggests that  
49 many individuals are socially isolated or lonely or both and that social isolation and  
50 loneliness may occur unequally across age groups. For example, Hawkley and  
51 colleagues<sup>6</sup> reported that loneliness decreased with age through the early 70s and then  
52 increased again. Several studies indicate that at least a fifth of adults report frequent  
53  
54  
55  
56  
57  
58  
59  
60

1  
2  
3 loneliness,<sup>7,8</sup> and that more than 40 percent of adults aged 60 and older report feeling  
4  
5 lonely.<sup>9</sup>  
6

7  
8 The extent to which individuals are socially isolated can have a profound  
9  
10 impact on both physical and psychological well-being.<sup>5</sup> Social isolation is thought to  
11  
12 influence health through behavioral and biological pathways.<sup>10</sup> Several studies  
13  
14 demonstrate that social isolation is associated with health-relevant behaviors, such as  
15  
16 lack of physical activity, poorer sleep, obsessive behavior, as well as neuroendocrine  
17  
18 dysregulation,<sup>10</sup> chronic allostatic load,<sup>11</sup> high blood pressure and poor immune  
19  
20 functioning.<sup>5,12,13</sup> Furthermore, the magnitude of the effect of social isolation on  
21  
22 mortality may be equivalent to or exceed the impacts of deleterious behaviors such as  
23  
24 excessive drinking or obesity.<sup>3</sup>  
25  
26  
27

28  
29 Physical distancing may increase social isolation therefore have a negative  
30  
31 impact on physical and mental health. For weighing up this potential impact in policy  
32  
33 decisions, the existing evidence needs to be considered. Against this background, we  
34  
35 conducted a systematic umbrella review to synthesize the evidence on the association  
36  
37 between social isolation and physical and mental health outcomes. As recommended  
38  
39 by the World Health Organization (WHO), we explored relevant meta-analyses by  
40  
41 means of a rapid review of evidence.<sup>14</sup>  
42  
43  
44  
45  
46

## 47 **Methods**

48  
49 The aims and methods of this umbrella review were registered with the PROSPERO  
50  
51 database (<http://www.crd.york.ac.uk/prospero>). To select relevant meta-analyses on  
52  
53 the association between social isolation and physical or mental health outcomes we  
54  
55 conducted a systematic search on 6<sup>th</sup> April 2020 using the databases Medline,  
56  
57 PsycINFO, and Web of Science. We conducted multi-field searches (in titles,  
58  
59  
60

1  
2  
3 abstracts, and key concepts) using the following terms: social isolation, loneliness,  
4 living alone, and meta-analy\*, which we combined using the Boolean operators “or”  
5 plus “and”. The full search string for Medline and PsycINFO was "( ( TI Loneliness  
6 OR AB loneliness OR SU Loneliness ) OR ( TI social isolation OR AB social  
7 isolation OR SU social isolation ) OR ( TI living alone OR AB living alone OR SU  
8 living alone ) ) AND ( TI meta-analy\* OR AB meta-analy\* OR SU meta-analy\* )".  
9  
10  
11  
12  
13  
14  
15  
16  
17 Relevant outcomes included any sort of physical or mental health outcome. We  
18 applied no restrictions on age of participants, applied research designs (i.e., cross-  
19 sectional, longitudinal), or publication language. Furthermore, we did not apply any  
20 limits. We first inspected the title and abstract of all hits and then read full texts of the  
21 hits that seemed to meet the aforementioned inclusion criteria. The Preferred  
22 Reporting Items for Systematic Reviews and Meta-analyses reporting standards were  
23 followed to document the process of systematic review selection.<sup>15</sup>

### 33 **Coding of trial characteristics**

34  
35 Systematic reviews with a quantitative synthesis of trial results (meta-analysis) were  
36 retained. Two reviewers (NM & THH) coded and extracted from each meta-analysis  
37 several objectively verifiable characteristics: Authors and year of publication,  
38 inclusion criteria, number of included primary studies, number of participants and  
39 their composition by age and health conditions, study design, type of social  
40 connection (social network ties/living alone/loneliness) evaluated, clinical outcome,  
41 length of follow-up, number of databases searched, and search areas. Furthermore, we  
42 extracted the main findings on the association between social network ties/living  
43 alone/loneliness and health outcomes (correlation values, odds ratios, or hazard ratios,  
44 and the corresponding 95% confidence intervals). With respect to the 95% confidence  
45  
46  
47  
48  
49  
50  
51  
52  
53  
54  
55  
56  
57  
58  
59  
60

1  
2  
3 intervals, both values greater than one (or both values less than one) represent a  
4  
5 significant increase (or decrease) as a function of social isolation.  
6  
7

### 8 **Quality Assessment**

9  
10 The quality of included systematic meta-analyses was independently assessed by two  
11  
12 reviewers (AK & TM) using A Measurement Tool to Assess Systematic Reviews – 2  
13  
14 (AMSTAR-2).<sup>16</sup> Following the tool's guidelines, the raters assigned one of four  
15  
16 global quality ratings (i.e., high, moderate, low, or critically low) after consideration  
17  
18 of 16 potential critical and non-critical weaknesses. Items addressing the following  
19  
20 criteria were considered as critical: Clear research question including definitions of  
21  
22 population, intervention, control group, and outcomes (PICO), adequacy of the  
23  
24 literature search, and adequate assessment and/or consideration of risk of bias in the  
25  
26 primary studies. Typically, high and moderate ratings reflect the presence of one or  
27  
28 more non-critical weakness, while low and critically low ratings indicate one or more  
29  
30 critical weaknesses. Any discrepancies among the independent raters were discussed  
31  
32 until consensus was reached.  
33  
34  
35  
36  
37  
38  
39  
40

## 41 **Results**

### 42 **Selection and characteristics of included studies**

43  
44 Figure 1 displays a PRISMA<sup>15</sup> flow diagram of the publication selection process.  
45  
46 After reading 530 abstracts, 89 full text publications were reviewed. The final review  
47  
48 resulted in 25 meta-analyses. Relevant characteristics of these meta-analyses are  
49  
50 summarized in Table 1.  
51  
52  
53  
54  
55  
56  
57  
58  
59  
60

**Table 1:** Overview of the included meta-analyses

| Publication                               | Social connections                                | Clinical outcome                               | Study design                     | Age: <i>M (SD)</i> , range, or cut-off | Literature search: timespan | Range of follow-up | <i>N</i> data-bases searched | Quality score                                                     |
|-------------------------------------------|---------------------------------------------------|------------------------------------------------|----------------------------------|----------------------------------------|-----------------------------|--------------------|------------------------------|-------------------------------------------------------------------|
| <b>Results:</b>                           |                                                   |                                                |                                  |                                        |                             |                    |                              |                                                                   |
| <b><i>Studies on physical health:</i></b> |                                                   |                                                |                                  |                                        |                             |                    |                              |                                                                   |
| Besora-Moreno et al., 2020                | Living alone                                      | Malnutrition/<br>malnutrition risk             | Cross-sectional                  | 60+                                    | 01.2000 -<br>12.2018        | n.a.               | 2                            | L                                                                 |
| Results:                                  | Living alone                                      |                                                | Combined effect                  |                                        |                             |                    |                              | <b>OR=1.92</b> (95% CI: 1.73–2.14); <i>k</i> =10; <i>N</i> =9,042 |
| Heidari Gorji et al., 2019                | Living alone, few social network ties, loneliness | Hospital readmission in heart failure patients | Longitudinal                     | 70.87 (8.62)                           | up to 11.2018               | 13 months          | 6                            | H                                                                 |
| Results:                                  | Any type of poor social connection                |                                                | Combined effect                  |                                        |                             |                    |                              | <b>OR=1.55</b> (95% CI: 1.39–1.73); <i>k</i> =13; <i>N</i> =6,468 |
|                                           | Living alone or few social network ties           |                                                | Combined effect                  |                                        |                             |                    |                              | <b>OR=1.52</b> (95% CI: 1.24–1.86); <i>k</i> =6; <i>N</i> =3,812  |
|                                           | Loneliness                                        |                                                | Combined effect                  |                                        |                             |                    |                              | <b>OR=1.63</b> (95% CI: 1.31–2.01); <i>k</i> =7; <i>N</i> =2,656  |
| Holt-Lunstad et al., 2015                 | Living alone, few social network ties, loneliness | Early mortality                                | Longitudinal                     | 66.00 (n.r.)                           | 01.1980 -<br>02.2014        | 7.1 years          | 5                            | L                                                                 |
| Results:                                  | Living alone                                      |                                                | Unadjusted studies               |                                        |                             |                    |                              | <b>OR=1.51</b> (95% CI: 1.32–1.74); <i>k</i> =20; <i>N</i> =n.r.  |
|                                           | Living alone                                      |                                                | Studies with multiple covariates |                                        |                             |                    |                              | <b>OR=1.32</b> (95% CI: 1.14–1.53); <i>k</i> =25; <i>N</i> =n.r.  |
|                                           | Few social network ties                           |                                                | Unadjusted studies               |                                        |                             |                    |                              | <b>OR=1.83</b> (95% CI: 1.27–2.63); <i>k</i> =3; <i>N</i> =n.r.   |
|                                           | Few social network ties                           |                                                | Studies with multiple covariates |                                        |                             |                    |                              | <b>OR=1.29</b> (95% CI: 1.06–1.56); <i>k</i> =14; <i>N</i> =n.r.  |
|                                           | Loneliness                                        |                                                | Unadjusted studies               |                                        |                             |                    |                              | <b>OR=1.49</b> (95% CI: 1.22–1.84); <i>k</i> =8; <i>N</i> =n.r.   |
|                                           | Loneliness                                        |                                                | Studies with multiple covariates |                                        |                             |                    |                              | <b>OR=1.26</b> (95% CI: 1.04–1.53); <i>k</i> =13; <i>N</i> =n.r.  |
| Jain et al., 2017                         | Living alone                                      | Reduced vaccine uptake in older adults         | Cross-sectional <sup>a,b</sup>   | 60+                                    | up to 02.2016               | n.r.               | 2                            | M                                                                 |
| Results:                                  | Living alone                                      |                                                | Seasonal influenza vaccine       |                                        |                             |                    |                              | <b>OR=1.39</b> (95% CI: 1.16–1.68); <i>k</i> =9; <i>N</i> =40,551 |
|                                           | Living alone                                      |                                                | Pneumococcal vaccine             |                                        |                             |                    |                              | <b>OR=1.71</b> (95% CI: 1.20–2.46); <i>k</i> =1; <i>N</i> =1,702  |



|                                  |                                     |                                                     |                                                          |                                    |                |      |                                                                     |   |
|----------------------------------|-------------------------------------|-----------------------------------------------------|----------------------------------------------------------|------------------------------------|----------------|------|---------------------------------------------------------------------|---|
| Kojima et al., 2020              | Living alone                        | Frailty in older adults                             | Cross-sectional <sup>b</sup> & longitudinal <sup>b</sup> | 60+                                | 2000 - 02.2019 | n.r. | 1                                                                   | L |
| Results: Living alone            |                                     |                                                     | Cross-sectional studies                                  |                                    |                |      | <b>OR=1.28</b> (95% CI: 1.13–1.45); <i>k</i> =44; <i>N</i> =113,374 |   |
|                                  |                                     |                                                     | Sub-analysis: only men                                   |                                    |                |      | <b>OR=1.71</b> (95% CI: 1.49–1.96); <i>k</i> =20; <i>N</i> =n.r.    |   |
|                                  |                                     |                                                     | Sub-analysis: only women                                 |                                    |                |      | OR=1.00 (95% CI: 0.83–1.20); <i>k</i> =22; <i>N</i> =n.r.           |   |
|                                  |                                     |                                                     | Sub-analysis: >=60, <70 years old                        |                                    |                |      | <b>OR=1.67</b> (95% CI: 1.51–1.86); <i>k</i> =4; <i>N</i> =n.r.     |   |
|                                  |                                     |                                                     | Sub-analysis: >=80 years old                             |                                    |                |      | OR=0.96 (95% CI: 0.69–1.31); <i>k</i> =6; <i>N</i> =n.r.            |   |
| Living alone                     |                                     |                                                     | Longitudinal studies                                     |                                    |                |      | OR=0.88 (95% CI: 0.76–1.03); <i>k</i> =6; <i>N</i> =38,549          |   |
| Maes et al., 2017                | Loneliness                          | Chronic physical conditions in children/adolescents | Cross-sectional <sup>a</sup>                             | children < 12 and adolescents < 21 | 1987 – 06.2016 | n.r. | 4                                                                   | L |
| Results: Loneliness              |                                     |                                                     | Combined effect (excl. 3 outliers)                       |                                    |                |      | <b>g=0.17</b> (95% CI: 0.03–0.30); <i>k</i> =40; <i>N</i> =3,981    |   |
|                                  |                                     |                                                     | Sub-analysis: control group studies                      |                                    |                |      | <b>g=0.13</b> (95% CI: 0.01–0.26); <i>k</i> =23; <i>N</i> =2,995    |   |
|                                  |                                     |                                                     | Sub-analysis: hearing/visual problems                    |                                    |                |      | <b>g=0.43</b> (n.r.); <i>k</i> =8; <i>N</i> =770                    |   |
| Rico-Uribe et al., 2018          | Loneliness                          | Early mortality                                     | Longitudinal <sup>b</sup>                                | Mainly 50+                         | up to 06.2016  | n.r. | 4                                                                   | H |
| Results: Loneliness              |                                     |                                                     | Combined effect                                          |                                    |                |      | <b>HR=1.22</b> (95% CI: 1.10–1.35); <i>k</i> =31; <i>N</i> =77,220  |   |
|                                  |                                     |                                                     | Sub-analysis: only men                                   |                                    |                |      | <b>HR=1.44</b> (95% CI: 1.19–1.76); <i>k</i> =7; <i>N</i> =5,815    |   |
|                                  |                                     |                                                     | Sub-analysis: only women                                 |                                    |                |      | <b>HR=1.26</b> (95% CI: 1.07–1.48); <i>k</i> =7; <i>N</i> =10,248   |   |
| Smith et al, 2020                | Few social network ties, loneliness | Inflammation markers                                | Cross-sectional <sup>a</sup>                             | 16+                                | up to 07.2019  | n.r. | 5                                                                   | H |
| Results: Few social network ties |                                     |                                                     | C-reactive protein: unadjusted studies                   |                                    |                |      | <b>r=.186</b> (95% CI: .063–.303); <i>k</i> =7; <i>N</i> =41,126    |   |
|                                  |                                     |                                                     | C-reactive protein: adjusted studies                     |                                    |                |      | <b>r=.021</b> (95% CI: .051–.092); <i>k</i> =11; <i>N</i> =41,911   |   |
|                                  |                                     |                                                     | Fibrinogen: unadjusted studies                           |                                    |                |      | <b>r=.103</b> (95% CI: .043–.163); <i>k</i> =6; <i>N</i> =15,421    |   |
|                                  |                                     |                                                     | Fibrinogen: adjusted studies                             |                                    |                |      | <b>r=.039</b> (95% CI: .011–.067); <i>k</i> =6; <i>N</i> =22,161    |   |
|                                  |                                     |                                                     | Interleukin-6: unadjusted studies                        |                                    |                |      | <b>r=.267</b> (95% CI: -.341–.718); <i>k</i> =4; <i>N</i> =12,291   |   |
|                                  |                                     |                                                     | Interleukin-6: adjusted studies                          |                                    |                |      | <b>r=-.003</b> (95% CI: -.148–.141); <i>k</i> =6; <i>N</i> =14,243  |   |
| Loneliness                       |                                     |                                                     | C-reactive protein: unadjusted studies                   |                                    |                |      | <b>r=.047</b> (95% CI: -.003–.098); <i>k</i> =8; <i>N</i> =17,835   |   |
|                                  |                                     |                                                     | C-reactive protein: adjusted studies                     |                                    |                |      | <b>r=.023</b> (95% CI: -.018–.065); <i>k</i> =6; <i>N</i> =19,292   |   |
|                                  |                                     |                                                     | Fibrinogen: unadjusted studies                           |                                    |                |      | <b>r=.006</b> (95% CI: -.057–.070); <i>k</i> =3; <i>N</i> =1,806    |   |

|                                  |                                       |                                    |                                        |                 |                   |                                                                     |      |    |                                                                                                      |                                                                                                                                                         |
|----------------------------------|---------------------------------------|------------------------------------|----------------------------------------|-----------------|-------------------|---------------------------------------------------------------------|------|----|------------------------------------------------------------------------------------------------------|---------------------------------------------------------------------------------------------------------------------------------------------------------|
|                                  |                                       |                                    |                                        |                 |                   |                                                                     |      |    | Fibrinogen: adjusted studies<br>Interleukin-6: unadjusted studies<br>Interleukin-6: adjusted studies | $r=.037$ (95% CI: -.015–.089); $k=4$ ; $N=7,672$<br>$r=.082$ (95% CI: -.001–.163); $k=4$ ; $N=4,219$<br>$r=.070$ (95% CI: .015–.124); $k=2$ ; $N=1,451$ |
| 6                                | 7                                     | 8                                  | 9                                      | 10              | 11                | 12                                                                  | 13   | 14 | 15                                                                                                   | 16                                                                                                                                                      |
| Step toe & Kivimäki, 2013        | Few social network ties, loneliness   | Cardiovascular disease             | Longitudinal <sup>b</sup>              | n.r.            | up to 2011        | n.r.                                                                | n.r. | CL |                                                                                                      |                                                                                                                                                         |
| Results:                         | Few social network ties or loneliness |                                    | Combined effect                        |                 |                   | <b>RR=1.51</b> (95% CI: 1.21–1.88); $k=7$ ; $N=n.r.$                |      |    |                                                                                                      |                                                                                                                                                         |
| Valtorta et al., 2016            | Few social network ties, loneliness   | Coronary heart disease and stroke  | Longitudinal <sup>b</sup>              | 18+             | up to 05.2015     | 3 to 21 years                                                       | 16   | H  |                                                                                                      |                                                                                                                                                         |
| Results:                         | Few social network ties or loneliness |                                    | Coronary heart disease                 |                 |                   | <b>RR=1.29</b> (95% CI: 1.04–1.59); $k=11$ ; $N=n.r.$               |      |    |                                                                                                      |                                                                                                                                                         |
|                                  | Few social network ties               |                                    | Stroke incidence                       |                 |                   | <b>RR=1.32</b> (95% CI: 1.04–1.68); $k=9$ ; $N=n.r.$                |      |    |                                                                                                      |                                                                                                                                                         |
| <b>Studies on mental health:</b> |                                       |                                    |                                        |                 |                   |                                                                     |      |    |                                                                                                      |                                                                                                                                                         |
| 18                               | 19                                    | 20                                 | 21                                     | 22              | 23                | 24                                                                  | 25   | 26 | 27                                                                                                   | 28                                                                                                                                                      |
| Chang et al., 2017               | Living alone, loneliness              | Late-life suicidal ideation        | Cross-sectional <sup>a,c</sup>         | 50+             | 01.2000 - 11.2016 | n.r.                                                                | 7    | L  |                                                                                                      |                                                                                                                                                         |
| Results:                         | Living alone Loneliness               |                                    | Combined effect                        |                 |                   | <b>OR=1.38</b> (95% CI: 1.19–1.61); $k=8$ ; $N=102,401$             |      |    |                                                                                                      |                                                                                                                                                         |
|                                  |                                       |                                    | Combined effect                        |                 |                   | <b>OR=2.24</b> (95% CI: 1.73–2.90); $k=3$ ; $N=58,482$              |      |    |                                                                                                      |                                                                                                                                                         |
| 23                               | 24                                    | 25                                 | 26                                     | 27              | 28                | 29                                                                  | 30   | 31 | 32                                                                                                   | 33                                                                                                                                                      |
| Chatterjee et al., 2018          | Few social network ties, loneliness   | Depression in civilians after 9/11 | Longitudinal                           | 43.78 (n.r.)    | 09.2001 - 07.2016 | n.r.                                                                | 3    | L  |                                                                                                      |                                                                                                                                                         |
| Results:                         | Few social network ties or loneliness |                                    | Combined effect                        |                 |                   | <b>OR=1.68</b> (99.5% CI:1.13–2.49); $k=4$ ; $N=27,395$             |      |    |                                                                                                      |                                                                                                                                                         |
| 34                               | 35                                    | 36                                 | 37                                     | 38              | 39                | 40                                                                  | 41   | 42 | 43                                                                                                   | 44                                                                                                                                                      |
| Chau et al., 2019                | Loneliness                            | Psychosis                          | Cross-sectional <sup>a,c</sup>         | Adults (mainly) | up 10.2018        | n.r.                                                                | 5    | M  |                                                                                                      |                                                                                                                                                         |
| Results:                         | Loneliness                            |                                    | Positive symptoms                      |                 |                   | <b><math>r=.302</math></b> (95% CI: .243–.359); $k=30$ ; $N=17,832$ |      |    |                                                                                                      |                                                                                                                                                         |
|                                  |                                       |                                    | Sub-analysis: clinical populations     |                 |                   | <b><math>r=.149</math></b> (95% CI: .057–.238); $k=14$ ; $N=n.r.$   |      |    |                                                                                                      |                                                                                                                                                         |
|                                  |                                       |                                    | Sub-analysis: non-clinical populations |                 |                   | <b><math>r=.389</math></b> (95% CI: .232–.526); $k=5$ ; $N=n.r.$    |      |    |                                                                                                      |                                                                                                                                                         |
|                                  |                                       |                                    | Sub-analysis: mixed populations        |                 |                   | <b><math>r=.366</math></b> (95% CI: .308–.422); $k=12$ ; $N=n.r.$   |      |    |                                                                                                      |                                                                                                                                                         |
|                                  |                                       |                                    | Sub-analysis: Paranoia                 |                 |                   | <b><math>r=.448</math></b> (95% CI: .371–.519); $k=7$ ; $N=n.r.$    |      |    |                                                                                                      |                                                                                                                                                         |
|                                  |                                       |                                    | Sub-analysis: Hallucinations           |                 |                   | <b><math>r=.201</math></b> (95% CI: .101–.297); $k=10$ ; $N=n.r.$   |      |    |                                                                                                      |                                                                                                                                                         |
|                                  | Loneliness                            |                                    | Negative psychotic symptoms            |                 |                   | <b><math>r=.347</math></b> (95% CI: .239–.446); $k=15$ ; $N=5,567$  |      |    |                                                                                                      |                                                                                                                                                         |
|                                  |                                       |                                    | Sub-analysis: clinical populations     |                 |                   | <b><math>r=.127</math></b> (95% CI: .029–.223); $k=9$ ; $N=n.r.$    |      |    |                                                                                                      |                                                                                                                                                         |
|                                  |                                       |                                    | Sub-analysis: non-clinical populations |                 |                   | <b><math>r=.479</math></b> (95% CI: .351–.589); $k=4$ ; $N=n.r.$    |      |    |                                                                                                      |                                                                                                                                                         |
|                                  |                                       |                                    | Sub-analysis: mixed populations        |                 |                   | <b><math>r=.547</math></b> (95% CI: .464–.620); $k=2$ ; $N=n.r.$    |      |    |                                                                                                      |                                                                                                                                                         |

|                        |                                     |                                            |                                        |                        |                                                                     |                   |   |    |
|------------------------|-------------------------------------|--------------------------------------------|----------------------------------------|------------------------|---------------------------------------------------------------------|-------------------|---|----|
| Choi & Smith, 2013     | Few social network ties             | Adolescents' smoking behaviors             | Cross-sectional                        | < 19                   | n.r.                                                                | n.a.              | 3 | CL |
| Results:               | Few social network ties             |                                            | Network position: isolate vs. member   |                        | <b>OR=1.55</b> (95% CI: 1.32–1.81); <i>k</i> =8; <i>N</i> =5,067    |                   |   |    |
|                        |                                     |                                            | Network position: isolated vs. liaison |                        | <b>OR=1.49</b> (95% CI: 1.07–2.07); <i>k</i> =8; <i>N</i> =5,067    |                   |   |    |
| Erzen & Çikrikci, 2018 | Loneliness                          | Depression                                 | Cross-sectional <sup>a</sup>           | Adults                 | up to 01.2018                                                       | n.r.              | 2 | CL |
| Results:               | Loneliness                          |                                            | Combined effect                        |                        | <i>r</i> =.50 (95% CI: .44–.55); <i>k</i> =88; <i>N</i> =40,068     |                   |   |    |
|                        |                                     |                                            | Sub-analysis: clinical populations     |                        | <i>r</i> =.54 (95% CI: .38–.67); <i>k</i> =10; <i>N</i> =n.r.       |                   |   |    |
|                        |                                     |                                            | Sub-analysis: other populations        |                        | <i>r</i> =.44 (95% CI: .16–.66); <i>k</i> =12; <i>N</i> =n.r.       |                   |   |    |
| Evans et al., 2018     | Few social network ties             | Cognitive functioning                      | Longitudinal                           | 50+                    | up to 01.2018                                                       | 2-24 years        | 4 | M  |
| Results:               | Few social network ties             |                                            | Combined effect                        |                        | <i>r</i> =.054 (95% CI: .043–.065); <i>k</i> =51; <i>N</i> =102,035 |                   |   |    |
|                        |                                     |                                            | Sub-analysis: global measures          |                        | <i>r</i> =.061 (95% CI: .044–.079); <i>k</i> =43; <i>N</i> =74,933  |                   |   |    |
|                        |                                     |                                            | Sub-analysis: memory                   |                        | <i>r</i> =.050 (95% CI: .028–.072); <i>k</i> =13; <i>N</i> =35,230  |                   |   |    |
|                        |                                     |                                            | Sub-analysis: executive functioning    |                        | <i>r</i> =.031 (95% CI: .015–.047); <i>k</i> =7; <i>N</i> =30,528   |                   |   |    |
| Kuiper et al., 2015    | Few social network ties, loneliness | Risk of dementia                           | Longitudinal <sup>b</sup>              | 60+                    | up to 07.2012                                                       | 2 to 15 years     | 3 | M  |
| Results:               | Few social network ties             |                                            | Low social network size                |                        | RR=1.17 (95% CI: 0.92–1.48); <i>k</i> =5; <i>N</i> =7,749           |                   |   |    |
|                        | Few social network ties             |                                            | Low level of participation             |                        | <b>RR=1.41</b> (95% CI: 1.13–1.75); <i>k</i> =6; <i>N</i> =7,687    |                   |   |    |
|                        | Few social network ties             |                                            | Low frequency of contacts              |                        | <b>RR=1.57</b> (95% CI: 1.32–1.85); <i>k</i> =8; <i>N</i> =15,762   |                   |   |    |
|                        | Loneliness                          |                                            | Feeling lonely                         |                        | <b>RR=1.58</b> (95% CI: 1.19–2.09); <i>k</i> =3; <i>N</i> =3,252    |                   |   |    |
|                        | Loneliness                          |                                            | Low satisfaction with social network   |                        | RR=1.25 (95% CI: 0.96–1.62); <i>k</i> =4; <i>N</i> =6,207           |                   |   |    |
| Lara et al., 2019      | Loneliness                          | Dementia & mild cognitive impairment       | Longitudinal <sup>b</sup>              | 50+                    | up to 11.2018                                                       | n.r.              | 6 | H  |
| Results:               | Loneliness                          |                                            | Combined effect                        |                        | <b>RR=1.26</b> (95% CI: 1.14–1.40); <i>k</i> =8; <i>N</i> =33,555   |                   |   |    |
| Maes et al., 2019      | Loneliness                          | Social anxiety in children/adolescents     | Cross-sectional & longitudinal         | 15.59 (4.27)           | 1981 – 06.2016                                                      | 1.25 to 72 months | 4 | CL |
| Results:               | Loneliness                          |                                            | Cross-sectional effects                |                        | <i>r</i> =.46 (95% CI: .43–.48); <i>k</i> =98; <i>N</i> =41,776     |                   |   |    |
|                        | Loneliness                          |                                            | Longitudinal/cross-lagged effects      |                        | <i>r</i> =.12 (95% CI: .04–.21); <i>k</i> =10; <i>N</i> =3,995      |                   |   |    |
| Mahon et al., 2006     | Loneliness                          | Depression & social anxiety in adolescence | Cross-sectional <sup>a</sup>           | Adolescents (11 to 23) | 1980 – 2004                                                         | n.r.              | 4 | CL |

|                                             |                                                   |                                         |                                |                 |                   |                                                                       |   |    |
|---------------------------------------------|---------------------------------------------------|-----------------------------------------|--------------------------------|-----------------|-------------------|-----------------------------------------------------------------------|---|----|
| Results: Loneliness                         |                                                   | Depression                              |                                |                 |                   | <i>r</i> =.61 (n.r.); <i>k</i> =30; <i>N</i> =17,691                  |   |    |
| Loneliness                                  |                                                   | Sub-analysis: outliers removed          |                                |                 |                   | <i>r</i> =.55 (n.r.); <i>k</i> =18; <i>N</i> =6,058                   |   |    |
| Loneliness                                  |                                                   | Anxiety                                 |                                |                 |                   | <i>r</i> =.41 (n.r.); <i>k</i> =12; <i>N</i> =3,853                   |   |    |
| Loneliness                                  |                                                   | Sub-analysis: outliers removed          |                                |                 |                   | <i>r</i> =.35 (n.r.); <i>k</i> =10; <i>N</i> =2,705                   |   |    |
| Michalska da Rocha et al., 2018             | Loneliness                                        | Psychosis                               | Cross-sectional <sup>a,c</sup> | Adults          | up to 02.2016     | n.r.                                                                  | 4 | H  |
| Results: Loneliness                         |                                                   | Combined effect                         |                                |                 |                   | <i>r</i> =.32 (95% CI: 0.20–0.44); <i>k</i> =13; <i>N</i> =15,647     |   |    |
| Penninkilampi et al., 2018                  | Living alone, few social network ties, loneliness | Risk of dementia                        | Longitudinal & case-control    | 60+             | 01.2012 – 05.2017 | 5.9 years                                                             | 8 | L  |
| Results: Any type of poor social connection |                                                   | Combined effect                         |                                |                 |                   | <b>RR=1.41</b> (95% CI: 1.21–1.65); <i>k</i> =15; <i>N</i> =2,330,163 |   |    |
| Few social network ties                     |                                                   | Combined effect                         |                                |                 |                   | <b>RR=1.59</b> (95% CI: 1.31–1.93); <i>k</i> =6; <i>N</i> =25,373     |   |    |
| Living alone                                |                                                   | Combined effect                         |                                |                 |                   | <b>RR=1.41</b> (95% CI: 1.07–1.84); <i>k</i> =4; <i>N</i> =5,401      |   |    |
| Loneliness                                  |                                                   | Combined effect                         |                                |                 |                   | RR=1.38 (95% CI: 0.98–1.94); <i>k</i> =4; <i>N</i> =4,698             |   |    |
| Teo et al., 2013                            | Living alone                                      | Social anxiety disorder                 | Cross-sectional <sup>a</sup>   | Adults (mainly) | 01.1980 - 02.2011 | n.r.                                                                  | 4 | M  |
| Results: Living alone                       |                                                   | Combined effect                         |                                |                 |                   | <b>OR=1.73</b> (95% CI: 1.34–2.24); <i>k</i> =4; <i>N</i> =12,831     |   |    |
|                                             |                                                   | Sub-analysis: large survey studies      |                                |                 |                   | <b>OR=1.70</b> (95% CI: 1.38–2.10); <i>k</i> =3; <i>N</i> =12,773     |   |    |
| Xiu-Ying et al., 2012                       | Living alone                                      | Late life depression                    | Cross-sectional & longitudinal | 55+             | 1966 - 08.2007    | n.r.                                                                  | 3 | CL |
| Results: Living alone                       |                                                   | Cross-sectional effects                 |                                |                 |                   | <b>OR=1.44</b> (95% CI: 1.04–1.99); <i>k</i> =16; <i>N</i> =34,090    |   |    |
| Living alone                                |                                                   | Sub-analysis: vs. living with family    |                                |                 |                   | <b>OR=2.59</b> (95% CI: 1.60–4.20); <i>k</i> =5; <i>N</i> =12,537     |   |    |
| Living alone                                |                                                   | Longitudinal/cross-lagged effects       |                                |                 |                   | RR=1.27 (95% CI: 0.89–1.80); <i>k</i> =4; <i>N</i> =1,345             |   |    |
| Yuan et al., 2019                           | Living alone                                      | Post-acute coronary syndrome depression | Longitudinal & case-control    | 19+             | 01.1996 - 03.2018 | n.r.                                                                  | 4 | L  |
| Results: Living alone                       |                                                   | Combined effect                         |                                |                 |                   | <b>OR=1.17</b> (95% CI: 1.12–1.22); <i>k</i> =11; <i>N</i> =n.r.      |   |    |

Note: For each result, we specify the type of social connection, the focus of the (sub-)analysis, followed by the reported effect size (in brackets: confidence intervals), as well as included numbers of independent studies and participants. Most meta-analyses included studies both with adjusted and with unadjusted

1  
2  
3  
4  
5  
6  
7  
8  
9  
10  
11  
12  
13  
14  
15  
16  
17  
18  
19  
20  
21  
22  
23  
24  
25  
26  
27  
28  
29  
30  
31  
32  
33  
34  
35  
36  
37  
38  
39  
40  
41  
42  
43  
44  
45  
46

effect sizes (typically controlling for potential confounders like age, sex, education, socioeconomic status, chronic conditions, depression or anxiety). Unless specified in the table, the authors did not indicate a preference for adjusted or for unadjusted effect sizes. Note that adequate consideration of confounding is also in part reflected in the quality scores. Effect sizes printed in boldface are statistically significant at alpha = 0.05. Abbreviations: n.a.: not applicable; n.r.: not reported; H: High; M: Moderate; L: Low; CL: Critically low.

<sup>a</sup> These studies included different study designs and extracted cross-sectional data or aggregated longitudinal and cross-sectional data.

<sup>b</sup> Effect sizes with adjustment for confounders were preferred in this meta-analysis.

<sup>c</sup> Effect sizes with no or minimal adjustment were preferred in this meta-analysis.

For peer review only

1  
2  
3 All publications were journal articles in English. Ten meta-analyses reported  
4  
5 associations of few social network ties, living alone, and loneliness with physical  
6  
7 health outcomes, and 15 with mental health outcomes. Different indicators of social  
8  
9 isolation were measured in the included studies. We considered as structural  
10  
11 indicators of social isolation *social network ties* defined as an objectively quantifiable  
12  
13 variable of one's social contacts irrespective of its perceived quality and *living alone*  
14  
15 as an objective characteristic of the living situation. Furthermore, we defined  
16  
17 *loneliness* as a quality indicator representing the subjective emotional appraisal of the  
18  
19 extent and quality of social relationships.<sup>5</sup> The meta-analyses differed with respect to  
20  
21 whether they kept these three measures of social isolation separate of whether they  
22  
23 combined them (see Tab. 1).  
24  
25  
26  
27

#### 28 Figure 1 & Table 1

29  
30  
31 A total of 276 primary studies were included in the 10 meta-analyses on  
32  
33 physical health. The reported results in Table 1 were based on sample sizes ranging  
34  
35 from 1,451<sup>17</sup> to 113,374<sup>18</sup> participants, with three meta-analyses not reporting on the  
36  
37 sample size. Five meta-analyses were based on longitudinal studies only, one on  
38  
39 cross-sectional studies only, and the remaining four on a pooled combination of both  
40  
41 cross-sectional and longitudinal studies. Furthermore, social network ties and living  
42  
43 alone were examined in 5 meta-analyses on physical health, respectively. Loneliness,  
44  
45 on the other hand, was examined in 7 meta-analyses on mental health. Only one of  
46  
47 these studies was conducted with children and adolescents.<sup>19</sup> The meta-analyses based  
48  
49 on cross-sectional studies revealed a significant association between social isolation  
50  
51 and the following health problems: chronic physical complaints in children and  
52  
53 adolescents,<sup>19</sup> coronary heart disease and stroke,<sup>20</sup> and frailty in older male (but not  
54  
55 female) adults.<sup>18</sup> Additionally, social isolation was associated with malnutrition<sup>21</sup> and  
56  
57  
58  
59  
60

1  
2  
3 vaccine uptake amongst older adults.<sup>22</sup> One meta-analysis<sup>17</sup> reported mostly non-  
4  
5 significant results on a positive association between social isolation and inflammation  
6  
7 (acute-phase C-reactive protein and fibrinogen). The meta-analyses conducted with  
8  
9 longitudinal studies indicate that social isolation is associated with increased risk of  
10  
11 cardiovascular disease,<sup>23</sup> early mortality,<sup>3,24</sup> and hospital readmission in heart failure  
12  
13 patients.<sup>25</sup>  
14  
15

16  
17 The 15 meta-analyses on mental health were based on a total of 416 primary  
18  
19 studies. The reported results are based on sample sizes ranging from 1,345<sup>26</sup> to  
20  
21 2,330,163<sup>27</sup> participants, with one meta-analysis failing to report on the sample size.  
22  
23 Four of the 15 meta-analyses provided longitudinal data only, one provided cross-  
24  
25 sectional data only, and the remaining ten meta-analyses reported on both cross-  
26  
27 sectional and longitudinal studies. In addition, social network ties, living alone, and  
28  
29 loneliness were examined in 5, 5, and 10 meta-analyses on mental health,  
30  
31 respectively. Three meta-analyses focused on studies with children and adolescents.<sup>28-</sup>  
32  
33  
34  
35  
36  
37  
38  
39  
40  
41  
42  
43  
44  
45  
46  
47  
48  
49  
50  
51  
52  
53  
54  
55  
56  
57  
58  
59  
60  
30 The included meta-analyses based on cross-sectional designs reported a significant  
positive association between social isolation and late-life suicidal ideation,<sup>31</sup>  
depression in adults,<sup>32</sup> late life depression,<sup>26</sup> psychosis,<sup>28,33,34</sup> smoking behavior in  
adolescents,<sup>29</sup> depression and social anxiety in childhood and adolescence,<sup>28,30</sup> and  
social anxiety disorder in adults.<sup>35</sup> The meta-analyses based on longitudinal studies  
suggest that social isolation is associated with higher risk of depression in adults,<sup>36</sup>  
post-acute coronary syndrome depression,<sup>37</sup> and dementia and cognitive impairment  
in later life.<sup>27,38-40</sup> See Table 1 for detailed information.

### Study quality

The Intraclass Correlation Coefficient (ICC) of the global quality ratings among the two raters was .83, 95% CI = .62 – .93, indicating good inter-rater reliability. Study

1  
2  
3 quality was very heterogeneous among meta-analyses both on physical and mental  
4 health (see Tab. 1). With respect to the meta-analyses on physical health, the global  
5 rating was high in 40%, medium in 10%, low in 40%, critically low in 10% of the  
6 meta-analyses. In the 15 meta-analyses on mental health, study quality was rated as  
7 high in 13%, medium in 27%, low in 27%, and critically low in 33% of the meta-  
8 analyses. Among the AMSTAR-2 criteria, inadequate assessment of risk of bias  
9 and/or lack of consideration of risk of bias represented the most frequent critical  
10 weaknesses of included meta-analyses.  
11  
12  
13  
14  
15  
16  
17  
18  
19  
20  
21  
22  
23

## 24 **Discussion**

25  
26 The review clearly demonstrates that social isolation is associated with poorer health.  
27 This applies to a range of physical and mental health outcomes and has been found in  
28 different populations and contexts. The evidence based on both cross-sectional and  
29 longitudinal data is substantial for physical health outcome and even more extensive  
30 for mental health outcomes. More specifically, social isolation is linked with chronic  
31 physical symptoms, frailty, coronary heart disease, stroke, early mortality,  
32 malnutrition, hospital readmission in heart failure patients, and vaccine uptake. With  
33 respect to mental health, social isolation is linked with depression in young and adult  
34 populations, social anxiety, psychosis, dementia and cognitive impairment in later  
35 life, and late-life suicidal ideation.  
36  
37  
38  
39  
40  
41  
42  
43  
44  
45  
46  
47  
48  
49  
50

## 51 **Strengths and limitations**

52  
53 This is, to our knowledge, the first review to synthesize the existing evidence that has  
54 been reported in meta-analyses on the link between social isolation and physical and  
55 mental health outcomes. The findings reflect a reasonable number of meta-analyses  
56  
57  
58  
59  
60



1  
2  
3 which in total included 692 studies. Thus, the overall conclusions of this umbrella  
4  
5 review are based on an extensive body of empirical evidence.  
6

7  
8 However, the review also has several limitations. Firstly, we considered  
9  
10 different indicators of social isolation, and our method did not allow us to identify  
11  
12 whether one indicator is more relevant than another. Secondly, half of the included  
13  
14 meta-analyses for both physical and mental health outcomes had an overall quality  
15  
16 rated on AMSTAR-2 as low or critically low, with inadequate consideration of risk of  
17  
18 bias being the most frequent critical flaw. Thirdly, the quality of the primary research  
19  
20 studies that went into the included meta-analyses also varied and their different  
21  
22 methodological shortcomings cannot be adequately considered in this review.  
23  
24 Fourthly, the results on the association between living alone and health outcomes  
25  
26 need to be interpreted with caution. As reported above, living alone is not necessarily  
27  
28 indicative of feeling lonely.<sup>2</sup> Finally, the review included a wide range of health  
29  
30 outcomes and did not quantify the strength of the associations for different outcomes.  
31  
32  
33  
34  
35  
36  
37

### 38 Implications

39  
40 The review leaves little doubt that social isolation is linked with poorer physical and  
41  
42 mental health. The findings are strengthened by the fact that several meta-analyses  
43  
44 were conducted with longitudinal studies. In particular, longitudinal data indicate that  
45  
46 social isolation is associated with increased risk of several physical and mental health  
47  
48 outcomes, cardiovascular disease, hospital readmission in heart failure patients, early  
49  
50 mortality, cognitive impairment, and depression.<sup>3,23-25,27,36-40</sup> However, the findings  
51  
52 are all based on observational studies and do not provide evidence on the causal  
53  
54 direction of the association. Poor physical and mental health can lead to social  
55  
56 isolation, and social isolation can lead to poorer health. For establishing a causal  
57  
58  
59  
60

1  
2  
3 relationship and examining the strength of the predictive relationship of social  
4  
5 isolation and loneliness with health outcomes experimental studies are required,  
6  
7 which were not the subject of this review.<sup>4,41</sup> Experimental research with animals,  
8  
9 however, suggests that social isolation increases mortality.<sup>42</sup> Furthermore,  
10  
11 experimental studies with humans indicate that randomly inducing loneliness or  
12  
13 exclusion leads to different health relevant physiological responses than being  
14  
15 randomly assigned to a support condition.<sup>42</sup> For most of the considered outcomes in  
16  
17 this review, a causal effect of social isolation is plausible and likely to explain at least  
18  
19 part of the identified associations. The casual direction is definite in case of the  
20  
21 greater risk of isolated people to die early.<sup>3</sup> For an explanation of the damaging effect  
22  
23 of social isolation on health outcomes, one may refer to different theoretical models.  
24  
25 Theorists from different perspectives have postulated that the impact of social  
26  
27 isolation on health is mediated by impairments in social capital,<sup>43</sup> social control,<sup>44</sup>  
28  
29 social identification,<sup>45</sup> and social support.<sup>46</sup>

30  
31  
32  
33  
34  
35  
36 Furthermore, some evidence from randomized controlled trials, however,  
37  
38 suggests that expanding the social connections of individuals, e.g., through  
39  
40 befriending programs, may indeed improve different health outcomes.<sup>47</sup> Altogether,  
41  
42 the literature on interventions to reduce loneliness and social isolation indicates that a  
43  
44 policy focus on social connection is a cost-effective strategy for enhancing health at  
45  
46 the population level due to the potential pay-offs in health care costs that would  
47  
48 otherwise occur. Existing volunteer friendly visiting programs or psychosocial group  
49  
50 interventions<sup>48</sup> may need to be redesigned to the point that they can be readily  
51  
52 implemented in accordance with existing rules of physical distancing. Creative  
53  
54 programs and interventions to foster social connections, including technology-based  
55  
56 social networking programs, are needed.<sup>49</sup> Furthermore, existing policies should  
57  
58  
59  
60

1  
2  
3 ensure that populations at greater risk, such as the poor and the elderly, receive most  
4  
5 support.<sup>1</sup>  
6

7  
8 All the included studies assessed social isolation as it occurs in a normal  
9  
10 societal context. Physical distancing as part of measures to limit the spread of  
11  
12 COVID-19 is different from the situations considered in the research synthesized in  
13  
14 this review. Firstly, for the vast majority of the population, the required physical  
15  
16 distancing leads to a much more pronounced social isolation than what they have  
17  
18 experienced before. Secondly, physical distancing is externally imposed and not due  
19  
20 to individual life style decisions, lack of material means, poor social skills or other  
21  
22 barriers to socialize. And thirdly, physical distancing is requested from people in an  
23  
24 overall context of uncertainty that comes with further stressors, health risks, and often  
25  
26 a reduced accessibility of health care.  
27  
28  
29

30  
31 It is important to note that physical distancing is a broad umbrella term that  
32  
33 incorporates a wide range of potential measures, with highly divergent implications  
34  
35 for social routines. It can include a full lock down and curfew, specific guidelines for  
36  
37 meetings and gatherings of people, physical distancing in public, and a recommended  
38  
39 or mandatory wearing of face masks. The type, degree, and duration of physical  
40  
41 distancing measures have been variable across countries and will affect how isolated  
42  
43 different groups in the population become.  
44  
45  
46

47  
48 One can only speculate as to whether and, if so, to what extent the increased  
49  
50 social isolation resulting from physical distancing measures in the current situation  
51  
52 will have an even greater impact on health outcomes than has been suggested in this  
53  
54 review. Arguably, an even greater impact can be expected for certain risk groups,  
55  
56 such as older people who are more threatened by COVID-19 and socially  
57  
58 disadvantaged groups (e.g., individuals in need of mental or physical health care or  
59  
60

1  
2  
3 individuals with low income) who often face even more economic adversity than  
4  
5 before the pandemic. Further research is required to identify which populations are at  
6  
7 particular risk to suffer health problems as a result of physical distancing and to  
8  
9 explore whether the resulting social isolation may – at least to some extent and in  
10  
11 some people – be compensated through positive effects of the pandemic, such as  
12  
13 strengthened local communities and increased options for online social activities.<sup>47,50</sup>  
14  
15  
16  
17  
18  
19

## 20 Conclusions

21  
22 In governmental decisions about future physical distancing measures, a potential  
23  
24 negative impact of the resulting physical isolation on the health of the population  
25  
26 needs to be considered. The existing literature suggests that social isolation and  
27  
28 loneliness may affect both physical and mental health outcomes and include an excess  
29  
30 mortality. However, the potential impact of physical distancing on social isolation and  
31  
32 loneliness and ultimately on physical and mental health outcomes need to be  
33  
34 thoroughly examined. In addition, the existing knowledge on the association between  
35  
36 social connection and physical and mental health should be considered in clinical  
37  
38 practice. Finally, more experimental research is needed to increase our understanding  
39  
40 of the causal relationship between social connection and physical and psychological  
41  
42 well-being.  
43  
44  
45  
46  
47  
48  
49  
50  
51  
52  
53  
54  
55  
56  
57  
58  
59  
60

1  
2  
3 **Figure Captions:** Fig.1. Flow diagram of study selection process.  
4  
5 ---

6 **Acknowledgements:** Not applicable.  
7  
8  
9

10 **Report about dual (co-)authorship:** No authors co-authored any of the systematic  
11 reviews and meta-analyses included in our overview.  
12  
13

14  
15 **Authors' Contributions:** NM had full access to all of the data in the study and takes  
16 responsibility for the integrity of the data and the accuracy of the data analysis.  
17 NM designed the search strategy with input from AK and TM. NM and AK carried  
18 out the literature searches and screening. NM, THH, and TM carried out the data  
19 extraction. AK and TM assessed the quality of the included meta-analyses. NM and  
20 SP wrote the first draft of the manuscript and all authors contributed to and have  
21 approved the final manuscript.  
22  
23  
24  
25  
26  
27  
28

29 **Funding/Support:** No funding received.  
30  
31

32 **Conflict of Interest Disclosures:** Not applicable.  
33  
34  
35

36 **Availability of data and materials:** All data generated or analysed during this study  
37 are included in this published article and supplementary material.  
38

39 Ethics approval and consent to participate: This study did not require ethical approval.  
40  
41  
42

43 **Consent for publication:** Not applicable.  
44  
45

46 **Patient and Public Involvement statement:** Not applicable.  
47  
48  
49  
50  
51  
52  
53  
54  
55  
56  
57  
58  
59  
60

## References

1. Holmes EA, O'Connor RC, Perry VH, et al. Multidisciplinary research priorities for the COVID-19 pandemic: a call for action for mental health science. *The Lancet Psychiatry*. 2020.
2. Perissinotto CM, Covinsky KE. Living alone, socially isolated or lonely - what are we measuring? *Journal of General Internal Medicine*. 2014;29(11):1429-1431.
3. Holt-Lunstad J, Smith TB, Baker M, Harris T, Stephenson D. Loneliness and social isolation as risk factors for mortality: a meta-analytic review. *Perspect Psychol Sci*. 2015;10(2):227-237. doi:10.1177/1745691614568352.
4. National Academies of Sciences, Engineering, and Medicine. *Social Isolation and Loneliness in Older Adults: Opportunities for the Health Care System*. Washington, DC: National Academies Press; 2020.
5. Holt-Lunstad J. Why Social Relationships Are Important for Physical Health: A Systems Approach to Understanding and Modifying Risk and Protection. *Annu Rev Psychol*. 2018;69:437-458. doi:10.1146/annurev-psych-122216-011902.
6. Hawkey LC, Wroblewski K, Kaiser T, Luhmann M, Schumm LP. Are US older adults getting lonelier? Age, period, and cohort differences. *Psychology and Aging*. 2019;34(8):1144.
7. DiJulio B, Hamel L, Muñana C, Brodie M. *Loneliness and social isolation in the United States, the United Kingdom, and Japan: An international survey*. The Economist & Kaiser Family Foundation; 2018.
8. Anderson GO, Thayer CE. *Loneliness and social connections: A national survey of adults 45 and older*. Washington, DC: AARP Foundation; 2018.
9. Perissinotto CM, Cenzer IS, Covinsky KE. Loneliness in older persons: a predictor of functional decline and death. *Archives of internal medicine*. 2012;172(14):1078-1084.
10. Cacioppo JT, Cacioppo S, Capitanio JP, Cole SW. The neuroendocrinology of social isolation. *Annu Rev Psychol*. 2015;66:733-767.
11. Seeman TE, Singer BH, Ryff CD, Love GD, Levy-Storms L. Social relationships, gender, and allostatic load across two age cohorts. *Psychosomatic medicine*. 2002;64(3):395-406.

12. Hawkey LC, Capitanio JP. Perceived social isolation, evolutionary fitness and health outcomes: a lifespan approach. *Philosophical Transactions of the Royal Society B: Biological Sciences*. 2015;370(1669):20140114.
13. Grant N, Hamer M, Steptoe A. Social isolation and stress-related cardiovascular, lipid, and cortisol responses. *Annals of Behavioral Medicine*. 2009;37(1):29-37.
14. Tricco AC, Langlois EV, Straus SE, others. *Rapid reviews to strengthen health policy and systems: a practical guide*. World Health Organization Geneva; 2017.
15. Moher D, Liberati A, Tetzlaff J, Altman DG. Preferred reporting items for systematic reviews and meta-analyses: the PRISMA statement. *Ann Intern Med*. 2009;151(4):264-269.
16. Shea BJ, Reeves BC, Wells G, et al. AMSTAR 2: a critical appraisal tool for systematic reviews that include randomised or non-randomised studies of healthcare interventions, or both. *BMJ*. 2017;358:j4008.
17. Smith KJ, Gavey S, Riddell NE, Kontari P, Victor C. The association between loneliness, social isolation and inflammation: A systematic review and meta-analysis. *Neurosci Biobehav Rev*. 2020;112:519-541.  
doi:10.1016/j.neubiorev.2020.02.002.
18. Kojima G, Taniguchi Y, Kitamura A, Fujiwara Y. Is living alone a risk factor of frailty? A systematic review and meta-analysis. *Ageing Res Rev*. 2020;59:101048.  
doi:10.1016/j.arr.2020.101048.
19. Maes M, van den Noortgate W, Fustolo-Gunnink SF, Rassart J, Luyckx K, Goossens L. Loneliness in Children and Adolescents With Chronic Physical Conditions: A Meta-Analysis. *J Pediatr Psychol*. 2017;42(6):622-635.  
doi:10.1093/jpepsy/jsx046.
20. Valtorta NK, Kanaan M, Gilbody S, Ronzi S, Hanratty B. Loneliness and social isolation as risk factors for coronary heart disease and stroke: systematic review and meta-analysis of longitudinal observational studies. *Heart*. 2016;102(13):1009-1016.
21. Besora-Moreno M, Llauradó E, Tarro L, Solà R. Social and Economic Factors and Malnutrition or the Risk of Malnutrition in the Elderly: A Systematic Review and Meta-Analysis of Observational Studies. *Nutrients*. 2020;12(3).  
doi:10.3390/nu12030737.
22. Jain A, van Hoek AJ, Boccia D, Thomas SL. Lower vaccine uptake amongst older individuals living alone: A systematic review and meta-analysis of social

- determinants of vaccine uptake. *Vaccine*. 2017;35(18):2315-2328.  
doi:10.1016/j.vaccine.2017.03.013.
23. Steptoe A, Kivimäki M. Stress and cardiovascular disease: an update on current knowledge. *Annu Rev Public Health*. 2013;34:337-354. doi:10.1146/annurev-publhealth-031912-114452.
24. Rico-Urbe LA, Caballero FF, Martín-María N, Cabello M, Ayuso-Mateos JL, Miret M. Association of loneliness with all-cause mortality: A meta-analysis. *PLoS ONE*. 2018;13(1):e0190033. doi:10.1371/journal.pone.0190033.
25. Heidari Gorji MA, Fatahian A, Farsavian A. The impact of perceived and objective social isolation on hospital readmission in patients with heart failure: A systematic review and meta-analysis of observational studies. *Gen Hosp Psychiatry*. 2019;60:27-36. doi:10.1016/j.genhosppsych.2019.07.002.
26. Xiu-Ying H, Qian C, Xiao-Dong P, Xue-Mei Z, Chang-Quan H. Living arrangements and risk for late life depression: a meta-analysis of published literature. *Int J Psychiatry Med*. 2012;43(1):19-34. doi:10.2190/PM.43.1.b.
27. Penninkilampi R, Casey A-N, Singh MF, Brodaty H. The Association between Social Engagement, Loneliness, and Risk of Dementia: A Systematic Review and Meta-Analysis. *J Alzheimers Dis*. 2018;66(4):1619-1633. doi:10.3233/JAD-180439.
28. Maes M, Nelemans SA, Danneel S, et al. Loneliness and social anxiety across childhood and adolescence: Multilevel meta-analyses of cross-sectional and longitudinal associations. *Dev Psychol*. 2019;55(7):1548-1565.  
doi:10.1037/dev0000719.
29. Choi HJ, Smith RA. Members, isolates, and liaisons: meta-analysis of adolescents' network positions and their smoking behavior. *Subst Use Misuse*. 2013;48(8):612-622. doi:10.3109/10826084.2013.800111.
30. Mahon NE, Yarcheski A, Yarcheski TJ, Cannella BL, Hanks MM. A meta-analytic study of predictors for loneliness during adolescence. *Nursing Research*. 2006;55(5):308-315.
31. Chang Q, Chan CH, Yip PSF. A meta-analytic review on social relationships and suicidal ideation among older adults. *Soc Sci Med*. 2017;191:65-76.  
doi:10.1016/j.socscimed.2017.09.003.
32. Erzen E, Çikrikci Ö. The effect of loneliness on depression: A meta-analysis. *Int J Soc Psychiatry*. 2018;64(5):427-435. doi:10.1177/0020764018776349.



- 1  
2  
3 33. Michalska da Rocha B, Rhodes S, Vasilopoulou E, Hutton P. Loneliness in  
4 Psychosis: A Meta-analytical Review. *Schizophr Bull.* 2018;44(1):114-125.  
5 doi:10.1093/schbul/sbx036.  
6  
7  
8 34. Chau AKC, Zhu C, So SH-W. Loneliness and the psychosis continuum: a meta-  
9 analysis on positive psychotic experiences and a meta-analysis on negative  
10 psychotic experiences. *Int Rev Psychiatry.* 2019;31(5-6):471-490.  
11 doi:10.1080/09540261.2019.1636005.  
12  
13 35. Teo AR, Lerrigo R, Rogers MAM. The role of social isolation in social anxiety  
14 disorder: a systematic review and meta-analysis. *J Anxiety Disord.*  
15 2013;27(4):353-364. doi:10.1016/j.janxdis.2013.03.010.  
16  
17 36. Chatterjee A, Banerjee S, Stein C, Kim M-H, DeFerio J, Pathak J. Risk Factors for  
18 Depression Among Civilians After the 9/11 World Trade Center Terrorist Attacks:  
19 A Systematic Review and Meta-Analysis. *PLoS Curr.* 2018;10.  
20 doi:10.1371/currents.dis.6a00b40c8ace0a6a0017361d7577c50a.  
21  
22 37. Yuan M-Z, Fang Q, Liu G-W, Zhou M, Wu J-M, Pu C-Y. Risk Factors for Post-  
23 Acute Coronary Syndrome Depression: A Meta-analysis of Observational Studies.  
24 *J Cardiovasc Nurs.* 2019;34(1):60-70. doi:10.1097/JCN.0000000000000520.  
25  
26 38. Evans IEM, Martyr A, Collins R, Brayne C, Clare L. Social Isolation and  
27 Cognitive Function in Later Life: A Systematic Review and Meta-Analysis. *J*  
28 *Alzheimers Dis.* 2019;70(s1):S119-S144. doi:10.3233/JAD-180501.  
29  
30 39. Lara E, Martín-María N, La Torre-Luque A de, et al. Does loneliness contribute to  
31 mild cognitive impairment and dementia? A systematic review and meta-analysis  
32 of longitudinal studies. *Ageing Res Rev.* 2019;52:7-16.  
33 doi:10.1016/j.arr.2019.03.002.  
34  
35 40. Kuiper JS, Zuidersma M, Oude Voshaar RC, et al. Social relationships and risk of  
36 dementia: A systematic review and meta-analysis of longitudinal cohort studies.  
37 *Ageing Res Rev.* 2015;22:39-57. doi:10.1016/j.arr.2015.04.006.  
38  
39 41. Ong AD, Uchino BN, Wethington E. Loneliness and health in older adults: A  
40 mini-review and synthesis. *Gerontology.* 2016;62(4):443-449.  
41  
42 42. Howick J, Kelly P, Kelly M. Establishing a causal link between social  
43 relationships and health using the Bradford Hill Guidelines. *SSM-Population*  
44 *Health.* 2019;8:100402.  
45  
46  
47  
48  
49  
50  
51  
52  
53  
54  
55  
56  
57  
58  
59  
60

- 1  
2  
3 43. Szreter S, Woolcock M. Health by association? Social capital, social theory, and  
4 the political economy of public health. *International journal of epidemiology*.  
5 2004;33(4):650-667.  
6  
7  
8 44. Craddock E, vanDellen MR, Novak SA, Ranby KW. Influence in relationships: A  
9 meta-analysis on health-related social control. *Basic and Applied Social  
10 Psychology*. 2015;37(2):118-130.  
11  
12 45. Postmes T, Wichmann LJ, van Valkengoed AM, van der Hoef H. Social  
13 identification and depression: A meta-analysis. *European journal of social  
14 psychology*. 2019;49(1):110-126.  
15  
16 46. Uchino BN, Bowen K, Grey RK de, Mikel J, Fisher EB. Social support and  
17 physical health: Models, mechanisms, and opportunities. In: *Principles and  
18 concepts of behavioral medicine*. Springer; 2018:341-372.  
19  
20 47. Siette J, Cassidy M, Priebe S. Effectiveness of befriending interventions: a  
21 systematic review and meta-analysis. *BMJ open*. 2017;7(4):e014304.  
22  
23 48. Fakoya OA, McCorry NK, Donnelly M. Loneliness and social isolation  
24 interventions for older adults: a scoping review of reviews. *BMC public health*.  
25 2020;20(1):1-14.  
26  
27 49. Czaja SJ, Boot WR, Charness N, Rogers WA, Sharit J. Improving social support  
28 for older adults through technology: Findings from the PRISM randomized  
29 controlled trial. *The Gerontologist*. 2018;58(3):467-477.  
30  
31 50. Steffens NK, LaRue CJ, Haslam C, et al. Social identification-building  
32 interventions to improve health: A systematic review and meta-analysis. *Health  
33 Psychology Review*. 2019:1-28.  
34  
35  
36  
37  
38  
39  
40  
41  
42  
43  
44  
45  
46  
47  
48  
49  
50  
51  
52  
53  
54  
55  
56  
57  
58  
59  
60

1  
2  
3  
4  
5  
6  
7  
8  
9  
10  
11  
12  
13  
14  
15  
16  
17  
18  
19  
20  
21  
22  
23  
24  
25  
26  
27  
28  
29  
30  
31  
32  
33  
34  
35  
36  
37  
38  
39  
40  
41  
42  
43  
44  
45  
46  
47  
48  
49  
50  
51  
52  
53  
54  
55  
56  
57  
58  
59  
60



Fig. 1. Flow diagram of study selection process

338x190mm (300 x 300 DPI)

## MOOSE (Meta-analyses Of Observational Studies in Epidemiology) Checklist

A reporting checklist for Authors, Editors, and Reviewers of Meta-analyses of Observational Studies. You must report the page number in your manuscript where you consider each of the items listed in this checklist. If you have not included this information, either revise your manuscript accordingly before submitting or note N/A.

| Reporting Criteria                                                                                              | Reported (Yes/No) | Reported on Page No. |
|-----------------------------------------------------------------------------------------------------------------|-------------------|----------------------|
| <b>Reporting of Background</b>                                                                                  |                   |                      |
| Problem definition                                                                                              |                   |                      |
| Hypothesis statement                                                                                            |                   |                      |
| Description of Study Outcome(s)                                                                                 |                   |                      |
| Type of exposure or intervention used                                                                           |                   |                      |
| Type of study design used                                                                                       |                   |                      |
| Study population                                                                                                |                   |                      |
| <b>Reporting of Search Strategy</b>                                                                             |                   |                      |
| Qualifications of searchers (eg, librarians and investigators)                                                  |                   |                      |
| Search strategy, including time period included in the synthesis and keywords                                   |                   |                      |
| Effort to include all available studies, including contact with authors                                         |                   |                      |
| Databases and registries searched                                                                               |                   |                      |
| Search software used, name and version, including special features used (eg, explosion)                         |                   |                      |
| Use of hand searching (eg, reference lists of obtained articles)                                                |                   |                      |
| List of citations located and those excluded, including justification                                           |                   |                      |
| Method for addressing articles published in languages other than English                                        |                   |                      |
| Method of handling abstracts and unpublished studies                                                            |                   |                      |
| Description of any contact with authors                                                                         |                   |                      |
| <b>Reporting of Methods</b>                                                                                     |                   |                      |
| Description of relevance or appropriateness of studies assembled for assessing the hypothesis to be tested      |                   |                      |
| Rationale for the selection and coding of data (eg, sound clinical principles or convenience)                   |                   |                      |
| Documentation of how data were classified and coded (eg, multiple raters, blinding, and interrater reliability) |                   |                      |
| Assessment of confounding (eg, comparability of cases and controls in studies where appropriate)                |                   |                      |

| Reporting Criteria                                                                                                                                                                                                                                                           | Reported (Yes/No) | Reported on Page No. |
|------------------------------------------------------------------------------------------------------------------------------------------------------------------------------------------------------------------------------------------------------------------------------|-------------------|----------------------|
| Assessment of study quality, including blinding of quality assessors; stratification or regression on possible predictors of study results                                                                                                                                   |                   |                      |
| Assessment of heterogeneity                                                                                                                                                                                                                                                  |                   |                      |
| Description of statistical methods (eg, complete description of fixed or random effects models, justification of whether the chosen models account for predictors of study results, dose-response models, or cumulative meta-analysis) in sufficient detail to be replicated |                   |                      |
| Provision of appropriate tables and graphics                                                                                                                                                                                                                                 |                   |                      |
| <b>Reporting of Results</b>                                                                                                                                                                                                                                                  |                   |                      |
| Table giving descriptive information for each study included                                                                                                                                                                                                                 |                   |                      |
| Results of sensitivity testing (eg, subgroup analysis)                                                                                                                                                                                                                       |                   |                      |
| Indication of statistical uncertainty of findings                                                                                                                                                                                                                            |                   |                      |
| <b>Reporting of Discussion</b>                                                                                                                                                                                                                                               |                   |                      |
| Quantitative assessment of bias (eg, publication bias)                                                                                                                                                                                                                       |                   |                      |
| Justification for exclusion (eg, exclusion of non-English-language citations)                                                                                                                                                                                                |                   |                      |
| Assessment of quality of included studies                                                                                                                                                                                                                                    |                   |                      |
| <b>Reporting of Conclusions</b>                                                                                                                                                                                                                                              |                   |                      |
| Consideration of alternative explanations for observed results                                                                                                                                                                                                               |                   |                      |
| Generalization of the conclusions (ie, appropriate for the data presented and within the domain of the literature review)                                                                                                                                                    |                   |                      |
| Guidelines for future research                                                                                                                                                                                                                                               |                   |                      |
| Disclosure of funding source                                                                                                                                                                                                                                                 |                   |                      |

Once you have completed this checklist, please save a copy and upload it as part of your submission. DO NOT include this checklist as part of the main manuscript document. It must be uploaded as a separate file.

# BMJ Open

## A potential impact of physical distancing on physical and mental health. A rapid narrative umbrella review of meta-analyses on the link between social connection and health

|                                 |                                                                                                                                                                                                                                                                                                                                              |
|---------------------------------|----------------------------------------------------------------------------------------------------------------------------------------------------------------------------------------------------------------------------------------------------------------------------------------------------------------------------------------------|
| Journal:                        | <i>BMJ Open</i>                                                                                                                                                                                                                                                                                                                              |
| Manuscript ID                   | bmjopen-2020-042335.R2                                                                                                                                                                                                                                                                                                                       |
| Article Type:                   | Original research                                                                                                                                                                                                                                                                                                                            |
| Date Submitted by the Author:   | 31-Jan-2021                                                                                                                                                                                                                                                                                                                                  |
| Complete List of Authors:       | Morina, Nexhmedin ; University of Münster, Psychology<br>Kip, Ahlke; University of Münster, Psychology<br>Hoppen, Thole; University of Münster, Psychology<br>Priebe, Stefan; Queen Mary University of London Faculty of Medicine and Dentistry, Unit of Social and Community Psychiatry<br>Meyer, Thomas; University of Münster, Psychology |
| <b>Primary Subject Heading</b>: | Global health                                                                                                                                                                                                                                                                                                                                |
| Secondary Subject Heading:      | Global health                                                                                                                                                                                                                                                                                                                                |
| Keywords:                       | PUBLIC HEALTH, Health policy < HEALTH SERVICES ADMINISTRATION & MANAGEMENT, Risk management < HEALTH SERVICES ADMINISTRATION & MANAGEMENT, MENTAL HEALTH, Health & safety < HEALTH SERVICES ADMINISTRATION & MANAGEMENT                                                                                                                      |
|                                 |                                                                                                                                                                                                                                                                                                                                              |

SCHOLARONE™  
Manuscripts



I, the Submitting Author has the right to grant and does grant on behalf of all authors of the Work (as defined in the below author licence), an exclusive licence and/or a non-exclusive licence for contributions from authors who are: i) UK Crown employees; ii) where BMJ has agreed a CC-BY licence shall apply, and/or iii) in accordance with the terms applicable for US Federal Government officers or employees acting as part of their official duties; on a worldwide, perpetual, irrevocable, royalty-free basis to BMJ Publishing Group Ltd ("BMJ") its licensees and where the relevant Journal is co-owned by BMJ to the co-owners of the Journal, to publish the Work in this journal and any other BMJ products and to exploit all rights, as set out in our [licence](#).

The Submitting Author accepts and understands that any supply made under these terms is made by BMJ to the Submitting Author unless you are acting as an employee on behalf of your employer or a postgraduate student of an affiliated institution which is paying any applicable article publishing charge ("APC") for Open Access articles. Where the Submitting Author wishes to make the Work available on an Open Access basis (and intends to pay the relevant APC), the terms of reuse of such Open Access shall be governed by a Creative Commons licence – details of these licences and which [Creative Commons](#) licence will apply to this Work are set out in our licence referred to above.

Other than as permitted in any relevant BMJ Author's Self Archiving Policies, I confirm this Work has not been accepted for publication elsewhere, is not being considered for publication elsewhere and does not duplicate material already published. I confirm all authors consent to publication of this Work and authorise the granting of this licence.

1  
2  
3  
4  
5  
6  
7  
8 **A potential impact of physical distancing on physical and mental health. A rapid**  
9  
10 **narrative umbrella review of meta-analyses on the link between social**  
11  
12 **connection and health**  
13  
14  
15  
16

17 Nexhmedin Morina, Ph.D.<sup>1</sup>, Ahlke Kip, M.Sc.<sup>1</sup>, Thole H. Hoppen, Ph.D.<sup>1</sup>, Stefan  
18 Priebe, FRCPsych<sup>2</sup>, Thomas Meyer, Ph.D.<sup>1</sup>  
19  
20  
21  
22  
23

24 <sup>1</sup> Institute of Psychology, University of Münster, Münster, Germany

25  
26 <sup>2</sup> Unit for Social and Community Psychiatry, Queen Mary University of London,  
27 London, UK  
28  
29  
30  
31  
32  
33  
34  
35  
36  
37

38 Short Title: Social connection and physical and mental health

39  
40 Word count (text only): 3097  
41  
42  
43  
44  
45  
46

47 \* Corresponding Author

48 Nexhmedin Morina, Ph.D.

49 Institute of Psychology

50 University of Münster

51 Fliegerstr. 21, 48149 Münster, Germany

52  
53  
54  
55  
56 e-Mail: [morina@uni-muenster.de](mailto:morina@uni-muenster.de)  
57  
58  
59  
60



## Abstract

**Background:** The imperative for physical distancing (mostly referred to as social distancing) during the coronavirus disease 2019 (COVID-19) pandemic may deteriorate physical and mental health. We aimed at summarizing the strength of evidence in the published literature on the association of physical and mental health with social connection via social isolation, living alone, and loneliness.

**Methods:** We conducted a systematic search in April 2020 to identify meta-analyses using the Medline, PsycINFO, and Web of Science databases. The search strategy included terms of social isolation, loneliness, living alone, and meta-analysis. Eligible meta-analyses needed to report any sort of association between an indicator of social connection and any physical or mental health outcome. The findings were summarized in a narrative synthesis.

**Results:** Twenty-five meta-analyses met our criteria, of which 10 focused on physical health and 15 on mental health outcomes. The results suggest that lack of social connection is associated with chronic physical symptoms, frailty, coronary heart disease, malnutrition, hospital readmission, reduced vaccine uptake, early mortality, depression, social anxiety, psychosis, cognitive impairment in later life, and suicidal ideation.

**Conclusions:** The existing evidence clearly indicates that social connection is associated with a range of poor physical and mental health outcomes. A potential negative impact on these outcomes needs to be considered in future decisions on physical distancing measures.

**Keywords:** Social isolation, living alone, loneliness, physical health, mental health, disease.

**Strengths and limitations of this study:**

- This rapid umbrella review focuses on a timely and societally relevant issue.
- The systematic literature search was conducted in three major databases from inception up to April 2020 warranting an extensive and up-to-date overview on relevant meta-analyses in the field.
- Quality of included meta-analyses was rated with a standardized measure.
- Different indicators of social connection were included.
- The utilized method did not allow for a quantitative comparison of associations with health outcomes.

## Background

The coronavirus 2019 (COVID-19) pandemic poses a global public health threat. In order to slow the spread of the virus by reducing contact rates, governments around the world have taken unprecedented political decisions that have transformed societies. The exact form and extent of these measures have varied, but they always include some type of physical distancing (mostly referred to as social distancing) making it impossible for people to maintain their normal social life.

In many countries, the restrictions have already been in place for several months. Depending on the further course of the pandemic with potential new waves, restrictions might continue for longer periods of time or be re-imposed after periods of loosening or abandoning them. When deciding about imposing, continuing or relaxing measures of physical distancing, governments have to consider and balance different risks. Whilst physical distancing is likely to reduce the risk of spreading the virus, it might generate other risks. These include potential damages to the economy and also possible negative consequences for the health of the population. For a balanced decision on further physical distancing measures, evidence is required on whether the measures are likely to impact on a range of health outcomes.

A recent general population survey revealed that physical distancing can increase the lack of social connection.<sup>1</sup> This may happen when people are prevented from travelling, physical meetings with significant others, and in some cases even from leaving their home other than for essential activities. Social connection has been suggested as an umbrella term representing the extent to which an individual connects to others.<sup>2</sup> Three indicators of social connection are commonly used in research: social isolation, living alone, and loneliness.<sup>3-5</sup> Social isolation is a behavioral measure of a person's social network that can – at least in theory – be objectively

1  
2  
3 quantified. Living alone describes a basic characteristic of an individual's social  
4  
5 situation which can be associated with reduced social relationships, but is not  
6  
7 necessarily so.<sup>2</sup> Loneliness, on the other hand, is an individual's subjective  
8  
9 assessment of the quality and quantity of their social relationships, reflecting a belief  
10  
11 that they have too few or too poor relationships, or both. Accordingly, social isolation  
12  
13 and living alone represent structural indicators, whereas loneliness represents a  
14  
15 quality measure of social connections.<sup>5,2</sup>  
16  
17  
18

19  
20 Although these three indicators capture distinct aspects of social connection,  
21  
22 they commonly overlap and are associated with each other. Literature suggests that  
23  
24 many individuals are socially isolated or lonely or both and that social isolation and  
25  
26 loneliness may occur unequally across age groups. For example, Hawkley and  
27  
28 colleagues<sup>6</sup> reported that loneliness decreased with age through the early 70s and then  
29  
30 increased again. Several studies indicate that at least a fifth of adults report frequent  
31  
32 loneliness,<sup>7,8</sup> and that more than 40 percent of adults aged 60 and older report feeling  
33  
34 lonely.<sup>9</sup>  
35  
36  
37

38  
39 The extent to which individuals are socially isolated can have a profound  
40  
41 impact on both physical and psychological well-being.<sup>2</sup> Social connection is thought  
42  
43 to influence health through behavioral and biological pathways.<sup>10</sup> Several studies  
44  
45 demonstrate that social connection is associated with health-relevant behaviors, such  
46  
47 as lack of physical activity, poorer sleep, obsessive behavior, as well as  
48  
49 neuroendocrine dysregulation,<sup>10</sup> chronic allostatic load,<sup>11</sup> high blood pressure and  
50  
51 poor immune functioning.<sup>2,12,13</sup> Furthermore, the magnitude of the effect of social  
52  
53 connection on mortality may be equivalent to or exceed the impacts of deleterious  
54  
55 behaviors such as excessive drinking or obesity.<sup>4</sup>  
56  
57  
58  
59  
60

1  
2  
3 Physical distancing may increase lack of social connection and therefore have  
4 a negative impact on physical and mental health. For weighing up this potential  
5 impact in policy decisions, the existing evidence needs to be considered. Against this  
6 background, we conducted a systematic umbrella review to synthesize the evidence  
7 on the association between social connection and physical and mental health  
8 outcomes. As recommended by the World Health Organization (WHO), we explored  
9 relevant meta-analyses by means of a rapid review of evidence.<sup>14</sup>  
10  
11  
12  
13  
14  
15  
16  
17  
18  
19  
20

## 21 **Methods**

22 To select relevant meta-analyses on the association between social connection and  
23 physical or mental health outcomes we conducted a systematic search on 6<sup>th</sup> April  
24 2020 using the databases Medline, PsycINFO, and Web of Science. We conducted  
25 multi-field searches (in titles, abstracts, and key concepts) using the following terms:  
26 social isolation, loneliness, living alone, and meta-analy\*, which we combined using  
27 the Boolean operators “or” plus “and”. The full search string for Medline and  
28 PsycINFO was "( ( TI Loneliness OR AB loneliness OR SU Loneliness ) OR ( TI  
29 social isolation OR AB social isolation OR SU social isolation ) OR ( TI living alone  
30 OR AB living alone OR SU living alone ) ) AND ( TI meta-analy\* OR AB meta-  
31 analy\* OR SU meta-analy\* )".  
32  
33  
34  
35  
36  
37  
38  
39  
40  
41  
42  
43  
44  
45  
46

47 Relevant outcomes included any sort of physical or mental health outcome. We  
48 applied no restrictions on age of participants, applied research designs (i.e., cross-  
49 sectional, longitudinal), or publication language. Furthermore, we did not apply any  
50 limits. We first inspected the title and abstract of all hits and then read full texts of the  
51 hits that seemed to meet the aforementioned inclusion criteria. The Preferred  
52  
53  
54  
55  
56  
57  
58  
59  
60

1  
2  
3 Reporting Items for Systematic Reviews and Meta-analyses reporting standards were  
4 followed to document the process of systematic review selection.<sup>15</sup>  
5  
6

### 7 **Coding of trial characteristics**

8  
9  
10 Systematic reviews with a quantitative synthesis of trial results (meta-analysis) were  
11 retained. Two reviewers (NM & THH) coded and extracted from each meta-analysis  
12 several objectively verifiable characteristics: Authors and year of publication,  
13 inclusion criteria, number of included primary studies, number of participants and  
14 their composition by age and health conditions, study design, type of social  
15 connection (social isolation/living alone/loneliness) evaluated, clinical outcome,  
16 length of follow-up, number of databases searched, and search areas. Furthermore, we  
17 extracted the main findings on the association between social isolation/living  
18 alone/loneliness and health outcomes (correlation values, odds ratios, or hazard ratios,  
19 and the corresponding 95% confidence intervals). With respect to the 95% confidence  
20 intervals, both values greater than one (or both values less than one) represent a  
21 significant increase (or decrease) as a function of social connection.  
22  
23  
24  
25  
26  
27  
28  
29  
30  
31  
32  
33  
34  
35  
36

### 37 **Quality Assessment**

38  
39  
40 The quality of included systematic meta-analyses was independently assessed by two  
41 reviewers (AK & TM) using A Measurement Tool to Assess Systematic Reviews – 2  
42 (AMSTAR-2).<sup>16</sup> Following the tool's guidelines, the raters assigned one of four  
43 global quality ratings (i.e., high, moderate, low, or critically low) after consideration  
44 of 16 potential critical and non-critical weaknesses. Items addressing the following  
45 criteria were considered as critical: Clear research question including definitions of  
46 population, intervention, control group, and outcomes (PICO), adequacy of the  
47 literature search, and adequate assessment and/or consideration of risk of bias in the  
48 primary studies. Typically, high and moderate ratings reflect the presence of one or  
49  
50  
51  
52  
53  
54  
55  
56  
57  
58  
59  
60

1  
2  
3 more non-critical weakness, while low and critically low ratings indicate one or more  
4  
5 critical weaknesses. Any discrepancies among the independent raters were discussed  
6  
7 until consensus was reached.  
8  
9  
10  
11  
12

## 13 **Results**

### 14 Selection and characteristics of included studies

15  
16  
17 Figure 1 displays a PRISMA<sup>15</sup> flow diagram of the publication selection process.

18  
19  
20 After reading 530 abstracts, 89 full text publications were reviewed. The final review  
21  
22 resulted in 25 meta-analyses. Relevant characteristics of these meta-analyses are  
23  
24 summarized in Table 1.  
25  
26  
27  
28  
29  
30  
31  
32  
33  
34  
35  
36  
37  
38  
39  
40  
41  
42  
43  
44  
45  
46  
47  
48  
49  
50  
51  
52  
53  
54  
55  
56  
57  
58  
59  
60

**Table 1:** Overview of the included meta-analyses

| Publication                        | Social connection                          | Clinical outcome                               | Study design                     | Age: <i>M (SD)</i> , range, or cut-off | Literature search: timespan | Range of follow-up                                                | <i>N</i> data-bases searched | Quality score |
|------------------------------------|--------------------------------------------|------------------------------------------------|----------------------------------|----------------------------------------|-----------------------------|-------------------------------------------------------------------|------------------------------|---------------|
| ↳ Results:                         |                                            |                                                |                                  |                                        |                             |                                                                   |                              |               |
| <i>Studies on physical health:</i> |                                            |                                                |                                  |                                        |                             |                                                                   |                              |               |
| Besora-Moreno et al., 2020         | Living alone                               | Malnutrition/<br>malnutrition risk             | Cross-sectional                  | 60+                                    | 01.2000 -<br>12.2018        | n.a.                                                              | 2                            | L             |
| Results:                           | Living alone                               |                                                | Combined effect                  |                                        |                             | <b>OR=1.92</b> (95% CI: 1.73–2.14); <i>k</i> =10; <i>N</i> =9,042 |                              |               |
| Heidari Gorji et al., 2019         | Living alone, social isolation, loneliness | Hospital readmission in heart failure patients | Longitudinal                     | 70.87 (8.62)                           | up to 11.2018               | 13 months                                                         | 6                            | H             |
| Results:                           | Any type of poor social connection         |                                                | Combined effect                  |                                        |                             | <b>OR=1.55</b> (95% CI: 1.39–1.73); <i>k</i> =13; <i>N</i> =6,468 |                              |               |
|                                    | Living alone or social isolation           |                                                | Combined effect                  |                                        |                             | <b>OR=1.52</b> (95% CI: 1.24–1.86); <i>k</i> =6; <i>N</i> =3,812  |                              |               |
|                                    | Loneliness                                 |                                                | Combined effect                  |                                        |                             | <b>OR=1.63</b> (95% CI: 1.31–2.01); <i>k</i> =7; <i>N</i> =2,656  |                              |               |
| Holt-Lunstad et al., 2015          | Living alone, social isolation, loneliness | Early mortality                                | Longitudinal                     | 66.00 (n.r.)                           | 01.1980 -<br>02.2014        | 7.1 years                                                         | 5                            | L             |
| Results:                           | Living alone                               |                                                | Unadjusted studies               |                                        |                             | <b>OR=1.51</b> (95% CI: 1.32–1.74); <i>k</i> =20; <i>N</i> =n.r.  |                              |               |
|                                    | Living alone                               |                                                | Studies with multiple covariates |                                        |                             | <b>OR=1.32</b> (95% CI: 1.14–1.53); <i>k</i> =25; <i>N</i> =n.r.  |                              |               |
|                                    | Social isolation                           |                                                | Unadjusted studies               |                                        |                             | <b>OR=1.83</b> (95% CI: 1.27–2.63); <i>k</i> =3; <i>N</i> =n.r.   |                              |               |
|                                    | Social isolation                           |                                                | Studies with multiple covariates |                                        |                             | <b>OR=1.29</b> (95% CI: 1.06–1.56); <i>k</i> =14; <i>N</i> =n.r.  |                              |               |
|                                    | Loneliness                                 |                                                | Unadjusted studies               |                                        |                             | <b>OR=1.49</b> (95% CI: 1.22–1.84); <i>k</i> =8; <i>N</i> =n.r.   |                              |               |
|                                    | Loneliness                                 |                                                | Studies with multiple covariates |                                        |                             | <b>OR=1.26</b> (95% CI: 1.04–1.53); <i>k</i> =13; <i>N</i> =n.r.  |                              |               |
| Jain et al., 2017                  | Living alone                               | Reduced vaccine uptake in older adults         | Cross-sectional <sup>a,b</sup>   | 60+                                    | up to 02.2016               | n.r.                                                              | 2                            | M             |
| Results:                           | Living alone                               |                                                | Seasonal influenza vaccine       |                                        |                             | <b>OR=1.39</b> (95% CI: 1.16–1.68); <i>k</i> =9; <i>N</i> =40,551 |                              |               |
|                                    | Living alone                               |                                                | Pneumococcal vaccine             |                                        |                             | <b>OR=1.71</b> (95% CI: 1.20–2.46); <i>k</i> =1; <i>N</i> =1,702  |                              |               |



|                         |                              |                                                     |                                                                                                                                                                                                                          |                                    |                |      |   |                                                                                                                                                                                                                                                                                                                                                                                                                             |
|-------------------------|------------------------------|-----------------------------------------------------|--------------------------------------------------------------------------------------------------------------------------------------------------------------------------------------------------------------------------|------------------------------------|----------------|------|---|-----------------------------------------------------------------------------------------------------------------------------------------------------------------------------------------------------------------------------------------------------------------------------------------------------------------------------------------------------------------------------------------------------------------------------|
| Kojima et al., 2020     | Living alone                 | Frailty in older adults                             | Cross-sectional <sup>b</sup> & longitudinal <sup>b</sup>                                                                                                                                                                 | 60+                                | 2000 - 02.2019 | n.r. | 1 | L                                                                                                                                                                                                                                                                                                                                                                                                                           |
| Results:                | Living alone                 |                                                     | Cross-sectional studies<br>Sub-analysis: only men<br>Sub-analysis: only women<br>Sub-analysis: >=60, <70 years old<br>Sub-analysis: >=80 years old                                                                       |                                    |                |      |   | <b>OR=1.28</b> (95% CI: 1.13–1.45); <i>k</i> =44; <i>N</i> =113,374<br><b>OR=1.71</b> (95% CI: 1.49–1.96); <i>k</i> =20; <i>N</i> =n.r.<br>OR=1.00 (95% CI: 0.83–1.20); <i>k</i> =22; <i>N</i> =n.r.<br><b>OR=1.67</b> (95% CI: 1.51–1.86); <i>k</i> =4; <i>N</i> =n.r.<br>OR=0.96 (95% CI: 0.69–1.31); <i>k</i> =6; <i>N</i> =n.r.                                                                                         |
|                         | Living alone                 |                                                     | Longitudinal studies                                                                                                                                                                                                     |                                    |                |      |   | OR=0.88 (95% CI: 0.76–1.03); <i>k</i> =6; <i>N</i> =38,549                                                                                                                                                                                                                                                                                                                                                                  |
| Maes et al., 2017       | Loneliness                   | Chronic physical conditions in children/adolescents | Cross-sectional <sup>a</sup>                                                                                                                                                                                             | children < 12 and adolescents < 21 | 1987 – 06.2016 | n.r. | 4 | L                                                                                                                                                                                                                                                                                                                                                                                                                           |
| Results:                | Loneliness                   |                                                     | Combined effect (excl. 3 outliers)<br>Sub-analysis: control group studies<br>Sub-analysis: hearing/visual problems                                                                                                       |                                    |                |      |   | <b>g=0.17</b> (95% CI: 0.03–0.30); <i>k</i> =40; <i>N</i> =3,981<br><b>g=0.13</b> (95% CI: 0.01–0.26); <i>k</i> =23; <i>N</i> =2,995<br><b>g=0.43</b> (n.r.); <i>k</i> =8; <i>N</i> =770                                                                                                                                                                                                                                    |
| Rico-Uribe et al., 2018 | Loneliness                   | Early mortality                                     | Longitudinal <sup>b</sup>                                                                                                                                                                                                | Mainly 50+                         | up to 06.2016  | n.r. | 4 | H                                                                                                                                                                                                                                                                                                                                                                                                                           |
| Results:                | Loneliness                   |                                                     | Combined effect<br>Sub-analysis: only men<br>Sub-analysis: only women                                                                                                                                                    |                                    |                |      |   | <b>HR=1.22</b> (95% CI: 1.10–1.35); <i>k</i> =31; <i>N</i> =77,220<br><b>HR=1.44</b> (95% CI: 1.19–1.76); <i>k</i> =7; <i>N</i> =5,815<br><b>HR=1.26</b> (95% CI: 1.07–1.48); <i>k</i> =7; <i>N</i> =10,248                                                                                                                                                                                                                 |
| Smith et al, 2020       | Social isolation, loneliness | Inflammation markers                                | Cross-sectional <sup>a</sup>                                                                                                                                                                                             | 16+                                | up to 07.2019  | n.r. | 5 | H                                                                                                                                                                                                                                                                                                                                                                                                                           |
| Results:                | Social isolation             |                                                     | C-reactive protein: unadjusted studies<br>C-reactive protein: adjusted studies<br>Fibrinogen: unadjusted studies<br>Fibrinogen: adjusted studies<br>Interleukin-6: unadjusted studies<br>Interleukin-6: adjusted studies |                                    |                |      |   | <b>r=.186</b> (95% CI: .063–.303); <i>k</i> =7; <i>N</i> =41,126<br><i>r</i> =.021 (95% CI: .051–.092); <i>k</i> =11; <i>N</i> =41,911<br><b>r=.103</b> (95% CI: .043–.163); <i>k</i> =6; <i>N</i> =15,421<br><b>r=.039</b> (95% CI: .011–.067); <i>k</i> =6; <i>N</i> =22,161<br><i>r</i> =.267 (95% CI: -.341–.718); <i>k</i> =4; <i>N</i> =12,291<br><i>r</i> =-.003 (95% CI: -.148–.141); <i>k</i> =6; <i>N</i> =14,243 |
|                         | Loneliness                   |                                                     | C-reactive protein: unadjusted studies<br>C-reactive protein: adjusted studies<br>Fibrinogen: unadjusted studies                                                                                                         |                                    |                |      |   | <i>r</i> =.047 (95% CI: -.003–.098); <i>k</i> =8; <i>N</i> =17,835<br><i>r</i> =.023 (95% CI: -.018–.065); <i>k</i> =6; <i>N</i> =19,292<br><i>r</i> =.006 (95% CI: -.057–.070); <i>k</i> =3; <i>N</i> =1,806                                                                                                                                                                                                               |

|                                  |                                                    |                                    |                                            |                 |                                                                                                                   |               |      |    |                                                                                                      |                                                                                                                                                         |
|----------------------------------|----------------------------------------------------|------------------------------------|--------------------------------------------|-----------------|-------------------------------------------------------------------------------------------------------------------|---------------|------|----|------------------------------------------------------------------------------------------------------|---------------------------------------------------------------------------------------------------------------------------------------------------------|
|                                  |                                                    |                                    |                                            |                 |                                                                                                                   |               |      |    | Fibrinogen: adjusted studies<br>Interleukin-6: unadjusted studies<br>Interleukin-6: adjusted studies | $r=.037$ (95% CI: -.015–.089); $k=4$ ; $N=7,672$<br>$r=.082$ (95% CI: -.001–.163); $k=4$ ; $N=4,219$<br>$r=.070$ (95% CI: .015–.124); $k=2$ ; $N=1,451$ |
| 6                                | 7                                                  | 8                                  | 9                                          | 10              | 11                                                                                                                | 12            | 13   | 14 | 15                                                                                                   | 16                                                                                                                                                      |
| Step toe & Kivimäki, 2013        | Social isolation, loneliness                       | Cardiovascular disease             | Longitudinal <sup>b</sup>                  | n.r.            | up to 2011                                                                                                        | n.r.          | n.r. | CL |                                                                                                      |                                                                                                                                                         |
| Results:                         | Social isolation or loneliness                     |                                    | Combined effect                            |                 | <b>RR=1.51</b> (95% CI: 1.21–1.88); $k=7$ ; $N=n.r.$                                                              |               |      |    |                                                                                                      |                                                                                                                                                         |
| Valtorta et al., 2016            | Social isolation, loneliness                       | Coronary heart disease and stroke  | Longitudinal <sup>b</sup>                  | 18+             | up to 05.2015                                                                                                     | 3 to 21 years | 16   | H  |                                                                                                      |                                                                                                                                                         |
| Results:                         | Social isolation or loneliness<br>Social isolation |                                    | Coronary heart disease<br>Stroke incidence |                 | <b>RR=1.29</b> (95% CI: 1.04–1.59); $k=11$ ; $N=n.r.$<br><b>RR=1.32</b> (95% CI: 1.04–1.68); $k=9$ ; $N=n.r.$     |               |      |    |                                                                                                      |                                                                                                                                                         |
| <b>Studies on mental health:</b> |                                                    |                                    |                                            |                 |                                                                                                                   |               |      |    |                                                                                                      |                                                                                                                                                         |
| Chang et al., 2017               | Living alone, loneliness                           | Late-life suicidal ideation        | Cross-sectional <sup>a,c</sup>             | 50+             | 01.2000 - 11.2016                                                                                                 | n.r.          | 7    | L  |                                                                                                      |                                                                                                                                                         |
| Results:                         | Living alone<br>Loneliness                         |                                    | Combined effect<br>Combined effect         |                 | <b>OR=1.38</b> (95% CI: 1.19–1.61); $k=8$ ; $N=102,401$<br><b>OR=2.24</b> (95% CI: 1.73–2.90); $k=3$ ; $N=58,482$ |               |      |    |                                                                                                      |                                                                                                                                                         |
| Chatterjee et al., 2018          | Social isolation, loneliness                       | Depression in civilians after 9/11 | Longitudinal                               | 43.78 (n.r.)    | 09.2001 - 07.2016                                                                                                 | n.r.          | 3    | L  |                                                                                                      |                                                                                                                                                         |
| Results:                         | Social isolation or loneliness                     |                                    | Combined effect                            |                 | <b>OR=1.68</b> (99.5% CI:1.13–2.49); $k=4$ ; $N=27,395$                                                           |               |      |    |                                                                                                      |                                                                                                                                                         |
| Chau et al., 2019                | Loneliness                                         | Psychosis                          | Cross-sectional <sup>a,c</sup>             | Adults (mainly) | up 10.2018                                                                                                        | n.r.          | 5    | M  |                                                                                                      |                                                                                                                                                         |
| Results:                         | Loneliness                                         |                                    | Positive symptoms                          |                 | $r=.302$ (95% CI: .243–.359); $k=30$ ; $N=17,832$                                                                 |               |      |    |                                                                                                      |                                                                                                                                                         |
|                                  |                                                    |                                    | Sub-analysis: clinical populations         |                 | $r=.149$ (95% CI: .057–.238); $k=14$ ; $N=n.r.$                                                                   |               |      |    |                                                                                                      |                                                                                                                                                         |
|                                  |                                                    |                                    | Sub-analysis: non-clinical populations     |                 | $r=.389$ (95% CI: .232–.526); $k=5$ ; $N=n.r.$                                                                    |               |      |    |                                                                                                      |                                                                                                                                                         |
|                                  |                                                    |                                    | Sub-analysis: mixed populations            |                 | $r=.366$ (95% CI: .308–.422); $k=12$ ; $N=n.r.$                                                                   |               |      |    |                                                                                                      |                                                                                                                                                         |
|                                  |                                                    |                                    | Sub-analysis: Paranoia                     |                 | $r=.448$ (95% CI: .371–.519); $k=7$ ; $N=n.r.$                                                                    |               |      |    |                                                                                                      |                                                                                                                                                         |
|                                  |                                                    |                                    | Sub-analysis: Hallucinations               |                 | $r=.201$ (95% CI: .101–.297); $k=10$ ; $N=n.r.$                                                                   |               |      |    |                                                                                                      |                                                                                                                                                         |
|                                  | Loneliness                                         |                                    | Negative psychotic symptoms                |                 | $r=.347$ (95% CI: .239–.446); $k=15$ ; $N=5,567$                                                                  |               |      |    |                                                                                                      |                                                                                                                                                         |
|                                  |                                                    |                                    | Sub-analysis: clinical populations         |                 | $r=.127$ (95% CI: .029–.223); $k=9$ ; $N=n.r.$                                                                    |               |      |    |                                                                                                      |                                                                                                                                                         |
|                                  |                                                    |                                    | Sub-analysis: non-clinical populations     |                 | $r=.479$ (95% CI: .351–.589); $k=4$ ; $N=n.r.$                                                                    |               |      |    |                                                                                                      |                                                                                                                                                         |
|                                  |                                                    |                                    | Sub-analysis: mixed populations            |                 | $r=.547$ (95% CI: .464–.620); $k=2$ ; $N=n.r.$                                                                    |               |      |    |                                                                                                      |                                                                                                                                                         |

|                        |                                                                                      |                                            |                                |                        |                |                                                                                                                                              |                                                                                                                                                                                                                                                                                                                                     |    |
|------------------------|--------------------------------------------------------------------------------------|--------------------------------------------|--------------------------------|------------------------|----------------|----------------------------------------------------------------------------------------------------------------------------------------------|-------------------------------------------------------------------------------------------------------------------------------------------------------------------------------------------------------------------------------------------------------------------------------------------------------------------------------------|----|
| Choi & Smith, 2013     | Social isolation                                                                     | Adolescents' smoking behaviors             | Cross-sectional                | < 19                   | n.r.           | n.a.                                                                                                                                         | 3                                                                                                                                                                                                                                                                                                                                   | CL |
| Results:               | Social isolation                                                                     |                                            |                                |                        |                | Network position: isolate vs. member<br>Network position: isolated vs. liaison                                                               | <b>OR=1.55</b> (95% CI: 1.32–1.81); <i>k</i> =8; <i>N</i> =5,067<br><b>OR=1.49</b> (95% CI: 1.07–2.07); <i>k</i> =8; <i>N</i> =5,067                                                                                                                                                                                                |    |
| Erzen & Çikrikci, 2018 | Loneliness                                                                           | Depression                                 | Cross-sectional <sup>a</sup>   | Adults                 | up to 01.2018  | n.r.                                                                                                                                         | 2                                                                                                                                                                                                                                                                                                                                   | CL |
| Results:               | Loneliness                                                                           |                                            |                                |                        |                | Combined effect<br>Sub-analysis: clinical populations<br>Sub-analysis: other populations                                                     | <i>r</i> =.50 (95% CI: .44–.55); <i>k</i> =88; <i>N</i> =40,068<br><i>r</i> =.54 (95% CI: .38–.67); <i>k</i> =10; <i>N</i> =n.r.<br><i>r</i> =.44 (95% CI: .16–.66); <i>k</i> =12; <i>N</i> =n.r.                                                                                                                                   |    |
| Evans et al., 2018     | Social isolation                                                                     | Cognitive functioning                      | Longitudinal                   | 50+                    | up to 01.2018  | 2-24 years                                                                                                                                   | 4                                                                                                                                                                                                                                                                                                                                   | M  |
| Results:               | Social isolation                                                                     |                                            |                                |                        |                | Combined effect<br>Sub-analysis: global measures<br>Sub-analysis: memory<br>Sub-analysis: executive functioning                              | <i>r</i> =.054 (95% CI: .043–.065); <i>k</i> =51; <i>N</i> =102,035<br><i>r</i> =.061 (95% CI: .044–.079); <i>k</i> =43; <i>N</i> =74,933<br><i>r</i> =.050 (95% CI: .028–.072); <i>k</i> =13; <i>N</i> =35,230<br><i>r</i> =.031 (95% CI: .015–.047); <i>k</i> =7; <i>N</i> =30,528                                                |    |
| Kuiper et al., 2015    | Social isolation, loneliness                                                         | Risk of dementia                           | Longitudinal <sup>b</sup>      | 60+                    | up to 07.2012  | 2 to 15 years                                                                                                                                | 3                                                                                                                                                                                                                                                                                                                                   | M  |
| Results:               | Social isolation<br>Social isolation<br>Social isolation<br>Loneliness<br>Loneliness |                                            |                                |                        |                | Low social network size<br>Low level of participation<br>Low frequency of contacts<br>Feeling lonely<br>Low satisfaction with social network | RR=1.17 (95% CI: 0.92–1.48); <i>k</i> =5; <i>N</i> =7,749<br><b>RR=1.41</b> (95% CI: 1.13–1.75); <i>k</i> =6; <i>N</i> =7,687<br><b>RR=1.57</b> (95% CI: 1.32–1.85); <i>k</i> =8; <i>N</i> =15,762<br><b>RR=1.58</b> (95% CI: 1.19–2.09); <i>k</i> =3; <i>N</i> =3,252<br>RR=1.25 (95% CI: 0.96–1.62); <i>k</i> =4; <i>N</i> =6,207 |    |
| Lara et al., 2019      | Loneliness                                                                           | Dementia & mild cognitive impairment       | Longitudinal <sup>b</sup>      | 50+                    | up to 11.2018  | n.r.                                                                                                                                         | 6                                                                                                                                                                                                                                                                                                                                   | H  |
| Results:               | Loneliness                                                                           |                                            |                                |                        |                | Combined effect                                                                                                                              | <b>RR=1.26</b> (95% CI: 1.14–1.40); <i>k</i> =8; <i>N</i> =33,555                                                                                                                                                                                                                                                                   |    |
| Maes et al., 2019      | Loneliness                                                                           | Social anxiety in children/adolescents     | Cross-sectional & longitudinal | 15.59 (4.27)           | 1981 - 06.2016 | 1.25 to 72 months                                                                                                                            | 4                                                                                                                                                                                                                                                                                                                                   | CL |
| Results:               | Loneliness<br>Loneliness                                                             |                                            |                                |                        |                | Cross-sectional effects<br>Longitudinal/cross-lagged effects                                                                                 | <i>r</i> =.46 (95% CI: .43–.48); <i>k</i> =98; <i>N</i> =41,776<br><i>r</i> =.12 (95% CI: .04–.21); <i>k</i> =10; <i>N</i> =3,995                                                                                                                                                                                                   |    |
| Mahon et al., 2006     | Loneliness                                                                           | Depression & social anxiety in adolescence | Cross-sectional <sup>a</sup>   | Adolescents (11 to 23) | 1980 - 2004    | n.r.                                                                                                                                         | 4                                                                                                                                                                                                                                                                                                                                   | CL |

|                                 |                                             |                                         |                                      |                 |                   |                                                            |   |    |
|---------------------------------|---------------------------------------------|-----------------------------------------|--------------------------------------|-----------------|-------------------|------------------------------------------------------------|---|----|
|                                 | Results: Loneliness                         |                                         | Depression                           |                 |                   | $r=.61$ (n.r.); $k=30$ ; $N=17,691$                        |   |    |
|                                 |                                             |                                         | Sub-analysis: outliers removed       |                 |                   | $r=.55$ (n.r.); $k=18$ ; $N=6,058$                         |   |    |
|                                 | Loneliness                                  |                                         | Anxiety                              |                 |                   | $r=.41$ (n.r.); $k=12$ ; $N=3,853$                         |   |    |
|                                 |                                             |                                         | Sub-analysis: outliers removed       |                 |                   | $r=.35$ (n.r.); $k=10$ ; $N=2,705$                         |   |    |
| Michalska da Rocha et al., 2018 | Loneliness                                  | Psychosis                               | Cross-sectional <sup>a,c</sup>       | Adults          | up to 02.2016     | n.r.                                                       | 4 | H  |
|                                 | Results: Loneliness                         |                                         | Combined effect                      |                 |                   | $r=.32$ (95% CI: 0.20–0.44); $k=13$ ; $N=15,647$           |   |    |
| Penninkilampi et al., 2018      | Living alone, social isolation, loneliness  | Risk of dementia                        | Longitudinal & case-control          | 60+             | 01.2012 – 05.2017 | 5.9 years                                                  | 8 | L  |
|                                 | Results: Any type of poor social connection |                                         | Combined effect                      |                 |                   | <b>RR=1.41</b> (95% CI: 1.21–1.65); $k=15$ ; $N=2,330,163$ |   |    |
|                                 | Social isolation                            |                                         | Combined effect                      |                 |                   | <b>RR=1.59</b> (95% CI: 1.31–1.93); $k=6$ ; $N=25,373$     |   |    |
|                                 | Living alone                                |                                         | Combined effect                      |                 |                   | <b>RR=1.41</b> (95% CI: 1.07–1.84); $k=4$ ; $N=5,401$      |   |    |
|                                 | Loneliness                                  |                                         | Combined effect                      |                 |                   | <b>RR=1.38</b> (95% CI: 0.98–1.94); $k=4$ ; $N=4,698$      |   |    |
| Teo et al., 2013                | Living alone                                | Social anxiety disorder                 | Cross-sectional <sup>a</sup>         | Adults (mainly) | 01.1980 - 02.2011 | n.r.                                                       | 4 | M  |
|                                 | Results: Living alone                       |                                         | Combined effect                      |                 |                   | <b>OR=1.73</b> (95% CI: 1.34–2.24); $k=4$ ; $N=12,831$     |   |    |
|                                 |                                             |                                         | Sub-analysis: large survey studies   |                 |                   | <b>OR=1.70</b> (95% CI: 1.38–2.10); $k=3$ ; $N=12,773$     |   |    |
| Xiu-Ying et al., 2012           | Living alone                                | Late life depression                    | Cross-sectional & longitudinal       | 55+             | 1966 - 08.2007    | n.r.                                                       | 3 | CL |
|                                 | Results: Living alone                       |                                         | Cross-sectional effects              |                 |                   | <b>OR=1.44</b> (95% CI: 1.04–1.99); $k=16$ ; $N=34,090$    |   |    |
|                                 |                                             |                                         | Sub-analysis: vs. living with family |                 |                   | <b>OR=2.59</b> (95% CI: 1.60–4.20); $k=5$ ; $N=12,537$     |   |    |
|                                 | Living alone                                |                                         | Longitudinal/cross-lagged effects    |                 |                   | <b>RR=1.27</b> (95% CI: 0.89–1.80); $k=4$ ; $N=1,345$      |   |    |
| Yuan et al., 2019               | Living alone                                | Post-acute coronary syndrome depression | Longitudinal & case-control          | 19+             | 01.1996 - 03.2018 | n.r.                                                       | 4 | L  |
|                                 | Results: Living alone                       |                                         | Combined effect                      |                 |                   | <b>OR=1.17</b> (95% CI: 1.12–1.22); $k=11$ ; $N=n.r.$      |   |    |

Note: For each result, we specify the type of social connection, the focus of the (sub-)analysis, followed by the reported effect size (in brackets: confidence intervals), as well as included numbers of independent studies and participants. Most meta-analyses included studies both with adjusted and unadjusted effect

1  
2 sizes (typically controlling for potential confounders like age, sex, education, socioeconomic status, chronic conditions, depression or anxiety). Unless specified  
3 in the table, the authors did not indicate a preference for adjusted or for unadjusted effect sizes. Note that adequate consideration of confounding is also in part  
4 reflected in the quality scores. Effect sizes printed in boldface are statistically significant at  $\alpha = 0.05$ . Abbreviations: n.a.: not applicable; n.r.: not reported;  
5 H: High; M: Moderate; L: Low; CL: Critically low.  
6

7 <sup>a</sup> These studies included different study designs and extracted cross-sectional data or aggregated longitudinal and cross-sectional data.

8 <sup>b</sup> Effect sizes with adjustment for confounders were preferred in this meta-analysis.

9 <sup>c</sup> Effect sizes with no or minimal adjustment were preferred in this meta-analysis.  
10  
11  
12  
13  
14  
15  
16  
17  
18  
19  
20  
21  
22  
23  
24  
25  
26  
27  
28  
29  
30  
31  
32  
33  
34  
35  
36  
37  
38  
39  
40  
41  
42  
43  
44  
45  
46

For peer review only

1  
2  
3 All publications were journal articles in English. Ten meta-analyses reported  
4 associations of social isolation, living alone, and loneliness with physical health  
5 outcomes, and 15 with mental health outcomes. Different indicators of social  
6 connection were measured in the included studies. We considered as structural  
7 indicators of social connection: *social isolation* defined as an objectively quantifiable  
8 variable of one's social network ties irrespective of its perceived quality and *living*  
9 *alone* as an objective characteristic of the living situation. Furthermore, we defined  
10 *loneliness* as a quality indicator representing the subjective emotional appraisal of the  
11 extent and quality of social relationships.<sup>2</sup> The meta-analyses differed with respect to  
12 whether they kept these three measures of social connection separate of whether they  
13 combined them (see Tab. 1).  
14  
15  
16  
17  
18  
19  
20  
21  
22  
23  
24  
25  
26  
27  
28

#### 29 Figure 1 & Table 1

30  
31 A total of 276 primary studies were included in the 10 meta-analyses on  
32 physical health. However, there was some overlap in samples in meta-analyses that  
33 examined cardiovascular disease<sup>17,18</sup> and early mortality.<sup>4,19</sup> Steptoe and Kivimäki<sup>17</sup>  
34 and Valtorta et al.<sup>18</sup> shared one primary study. In addition, Holt-Lunstad et al.<sup>4</sup> and  
35 Rico-Urbe et al.<sup>19</sup> shared 12 primary studies. The reported results in Table 1 were  
36 based on sample sizes ranging from 1,451<sup>20</sup> to 113,374<sup>21</sup> participants, with three  
37 meta-analyses not reporting on the sample size. Five meta-analyses were based on  
38 longitudinal studies only, one on cross-sectional studies only, and the remaining four  
39 on a pooled combination of both cross-sectional and longitudinal studies.  
40  
41 Furthermore, social isolation and living alone were examined in 5 meta-analyses on  
42 physical health, respectively. Loneliness, on the other hand, was examined in 7 meta-  
43 analyses on mental health. Only one of these studies was conducted with children and  
44 adolescents.<sup>22</sup> The meta-analyses based on cross-sectional studies revealed a  
45  
46  
47  
48  
49  
50  
51  
52  
53  
54  
55  
56  
57  
58  
59  
60

1  
2  
3 significant association between social connection and the following health problems:  
4  
5 chronic physical complaints in children and adolescents,<sup>22</sup> coronary heart disease and  
6  
7 stroke,<sup>18</sup> and frailty in older male (but not female) adults.<sup>21</sup> Additionally, social  
8  
9 connection was associated with malnutrition<sup>23</sup> and vaccine uptake amongst older  
10  
11 adults.<sup>24</sup> One meta-analysis<sup>20</sup> reported mostly non-significant results on a positive  
12  
13 association between social connection and inflammation (acute-phase C-reactive  
14  
15 protein and fibrinogen). The meta-analyses conducted with longitudinal studies  
16  
17 indicate that social connection is associated with increased risk of cardiovascular  
18  
19 disease,<sup>17</sup> early mortality,<sup>4,19</sup> and hospital readmission in heart failure patients.<sup>25</sup>  
20  
21  
22  
23

24 The 15 meta-analyses on mental health were based on a total of 416 primary  
25  
26 studies. The reported results are based on sample sizes ranging from 1,345<sup>26</sup> to  
27  
28 2,330,163<sup>27</sup> participants, with one meta-analysis failing to report on the sample size.  
29  
30 There was some overlap in samples in the four meta-analyses focusing on cognitive  
31  
32 functioning or risk of dementia.<sup>27-30</sup> Kuiper et al.<sup>29</sup> shared two primary studies with  
33  
34 Evans et al.<sup>28</sup>, four with Lara et al.<sup>30</sup>, and three with Penninkilampi et al.<sup>27</sup>  
35  
36 Penninkilampi et al.<sup>27</sup> further shared two primary studies Lara et al.<sup>30</sup> Four of the 15  
37  
38 meta-analyses provided longitudinal data only, one provided cross-sectional data  
39  
40 only, and the remaining ten meta-analyses reported on both cross-sectional and  
41  
42 longitudinal studies. In addition, social isolation, living alone, and loneliness were  
43  
44 examined in 5, 5, and 10 meta-analyses on mental health, respectively. Three meta-  
45  
46 analyses focused on studies with children and adolescents.<sup>31-33</sup> The included meta-  
47  
48 analyses based on cross-sectional designs reported a significant positive association  
49  
50 between social connection and late-life suicidal ideation,<sup>34</sup> depression in adults,<sup>35</sup> late  
51  
52 life depression,<sup>26</sup> psychosis,<sup>31,36,37</sup> smoking behavior in adolescents,<sup>32</sup> depression and  
53  
54 social anxiety in childhood and adolescence,<sup>31,33</sup> and social anxiety disorder in  
55  
56  
57  
58  
59  
60

1  
2  
3 adults.<sup>38</sup> The meta-analyses based on longitudinal studies suggest that social  
4  
5 connection is associated with higher risk of depression in adults,<sup>39</sup> post-acute  
6  
7 coronary syndrome depression,<sup>40</sup> and dementia and cognitive impairment in later  
8  
9 life.<sup>27,28,30,29</sup> See Table 1 for detailed information.

### 12 Study quality

13  
14 The Intraclass Correlation Coefficient (ICC) of the global quality ratings among the  
15  
16 two raters was .83, 95% CI = .62 – .93, indicating good inter-rater reliability. Study  
17  
18 quality was very heterogeneous among meta-analyses both on physical and mental  
19  
20 health (see Tab. 1). With respect to the meta-analyses on physical health, the global  
21  
22 rating was high in 40%, medium in 10%, low in 40%, critically low in 10% of the  
23  
24 meta-analyses. In the 15 meta-analyses on mental health, study quality was rated as  
25  
26 high in 13%, medium in 27%, low in 27%, and critically low in 33% of the meta-  
27  
28 analyses. Among the AMSTAR-2 criteria, inadequate assessment of risk of bias  
29  
30 and/or lack of consideration of risk of bias represented the most frequent critical  
31  
32 weaknesses of included meta-analyses.  
33  
34  
35  
36  
37  
38  
39

### 40 Discussion

41  
42 The review clearly demonstrates that lack of social connection is associated with  
43  
44 poorer health. This applies to a range of physical and mental health outcomes and has  
45  
46 been found in different populations and contexts. The evidence based on both cross-  
47  
48 sectional and longitudinal data is substantial for physical health outcome and even  
49  
50 more extensive for mental health outcomes. More specifically, social connection is  
51  
52 linked with chronic physical symptoms, frailty, coronary heart disease, stroke, early  
53  
54 mortality, malnutrition, hospital readmission in heart failure patients, and vaccine  
55  
56 uptake. With respect to mental health, social connection is linked with depression in  
57  
58  
59  
60



1  
2  
3 young and adult populations, social anxiety, psychosis, dementia and cognitive  
4  
5 impairment in later life, and late-life suicidal ideation.  
6  
7  
8  
9

## 10 Strengths and limitations

11  
12 This is, to our knowledge, the first review to synthesize the existing evidence that has  
13  
14 been reported in meta-analyses on the link between social connection and physical  
15  
16 and mental health outcomes. The findings reflect a reasonable number of meta-  
17  
18 analyses. Thus, the overall conclusions of this umbrella review are based on an  
19  
20 extensive body of empirical evidence.  
21  
22

23  
24 However, the review also has several limitations. Firstly, we considered  
25  
26 different indicators of social connection, and our method did not allow us to identify  
27  
28 whether one indicator is more relevant than another. Secondly, half of the included  
29  
30 meta-analyses for both physical and mental health outcomes had an overall quality  
31  
32 rated on AMSTAR-2 as low or critically low, with inadequate consideration of risk of  
33  
34 bias being the most frequent critical flaw. Thirdly, the quality of the primary research  
35  
36 studies that went into the included meta-analyses also varied and their different  
37  
38 methodological shortcomings cannot be adequately considered in this review.  
39  
40 Fourthly, the results on the association between living alone and health outcomes  
41  
42 need to be interpreted with caution. As reported above, living alone is not necessarily  
43  
44 indicative of feeling lonely.<sup>3</sup> Finally, the review included a wide range of health  
45  
46 outcomes and did not quantify the strength of the associations for different outcomes.  
47  
48  
49  
50  
51  
52  
53

## 54 Implications

55  
56 The review leaves little doubt that social connection is linked with poorer physical  
57  
58 and mental health. The findings are strengthened by the fact that several meta-  
59  
60

1  
2  
3 analyses were conducted with longitudinal studies. In particular, longitudinal data  
4  
5 indicate that social connection is associated with increased risk of several physical  
6  
7 and mental health outcomes, cardiovascular disease, hospital readmission in heart  
8  
9 failure patients, early mortality, cognitive impairment, and  
10  
11 depression.<sup>4,17,19,25,27,39,40,28,30,29</sup> However, the findings are all based on observational  
12  
13 studies and do not provide evidence on the causal direction of the association. Poor  
14  
15 physical and mental health can lead to lack of social connection, and lack of social  
16  
17 connection can lead to poorer health. For establishing a causal relationship and  
18  
19 examining the strength of the predictive relationship of social isolation and loneliness  
20  
21 with health outcomes experimental studies are required, which were not the subject of  
22  
23 this review.<sup>5,41</sup> Experimental research with animals, however, suggests that lack of  
24  
25 social connection increases mortality.<sup>42</sup> Furthermore, experimental studies with  
26  
27 humans indicate that randomly inducing loneliness or exclusion leads to different  
28  
29 health relevant physiological responses than being randomly assigned to a support  
30  
31 condition.<sup>42</sup> For most of the considered outcomes in this review, a causal effect of  
32  
33 social connection is plausible and likely to explain at least part of the identified  
34  
35 associations. The casual direction is definite in case of the greater risk of isolated  
36  
37 people to die early.<sup>4</sup> For an explanation of the damaging effect of social connection on  
38  
39 health outcomes, one may refer to different theoretical models. Theorists from  
40  
41 different perspectives have postulated that the impact of social connection on health is  
42  
43 mediated by impairments in social capital,<sup>43</sup> social control,<sup>44</sup> social identification,<sup>45</sup>  
44  
45 and social support.<sup>46</sup>

46  
47 Furthermore, some evidence from randomized controlled trials, however,  
48  
49 suggests that expanding the social connections of individuals, e.g., through  
50  
51 befriending programs, may indeed improve different health outcomes.<sup>47</sup> Altogether,  
52  
53  
54  
55  
56  
57  
58  
59  
60

1  
2  
3 the literature on interventions to reduce loneliness and social isolation indicates that a  
4 policy focus on social connection is a cost-effective strategy for enhancing health at  
5 the population level due to the potential pay-offs in health care costs that would  
6 otherwise occur. Existing volunteer friendly visiting programs or psychosocial group  
7 interventions<sup>48</sup> may need to be redesigned to the point that they can be readily  
8 implemented in accordance with existing rules of physical distancing. Creative  
9 programs and interventions to foster social connections, including technology-based  
10 social networking programs, are needed.<sup>49</sup> Furthermore, existing policies should  
11 ensure that populations at greater risk, such as the poor, receive most support.<sup>1</sup>  
12  
13  
14  
15  
16  
17  
18  
19  
20  
21  
22  
23

24 All the included studies assessed social connection as it occurs in a normal  
25 societal context. Physical distancing as part of measures to limit the spread of  
26 COVID-19 is different from the situations considered in the research synthesized in  
27 this review. Firstly, for the vast majority of the population, the required physical  
28 distancing leads to a much more pronounced lack of social connection than what they  
29 have experienced before. Secondly, physical distancing is externally imposed and not  
30 due to individual life style decisions, lack of material means, poor social skills or  
31 other barriers to socialize. And thirdly, physical distancing is requested from people  
32 in an overall context of uncertainty that comes with further stressors, health risks, and  
33 often a reduced accessibility of health care.  
34  
35  
36  
37  
38  
39  
40  
41  
42  
43  
44  
45  
46

47 It is important to note that physical distancing is a broad umbrella term that  
48 incorporates a wide range of potential measures, with highly divergent implications  
49 for social routines. It can include a full lock down and curfew, specific guidelines for  
50 meetings and gatherings of people, physical distancing in public, and a recommended  
51 or mandatory wearing of face masks. The type, degree, and duration of physical  
52  
53  
54  
55  
56  
57  
58  
59  
60

1  
2  
3 distancing measures have been variable across countries and will affect how isolated  
4  
5 different groups in the population become.  
6

7  
8 One can only speculate as to whether and, if so, to what extent the increased  
9  
10 lack of social connections resulting from physical distancing measures in the current  
11  
12 situation will have an even greater impact on health outcomes than has been  
13  
14 suggested in this review. Arguably, an even greater impact can be expected for certain  
15  
16 risk groups, such as socially disadvantaged groups (e.g., individuals in need of mental  
17  
18 or physical health care or individuals with low income) who often face even more  
19  
20 economic adversity than before the pandemic. Further research is required to identify  
21  
22 which populations are at particular risk to suffer health problems as a result of  
23  
24 physical distancing and to explore whether the resulting lack of social connections  
25  
26 may – at least to some extent and in some people – be compensated through positive  
27  
28 effects of the pandemic, such as strengthened local communities and increased  
29  
30 options for online social activities.<sup>47,50</sup>  
31  
32  
33  
34  
35  
36  
37

### 38 Conclusions

39  
40 In governmental decisions about future physical distancing measures, a potential  
41  
42 negative impact of the resulting physical isolation on the health of the population  
43  
44 needs to be considered. The existing literature suggests that social isolation and  
45  
46 loneliness may affect both physical and mental health outcomes and include an excess  
47  
48 mortality. However, the potential impact of physical distancing on social isolation and  
49  
50 loneliness and ultimately on physical and mental health outcomes need to be  
51  
52 thoroughly examined. In addition, the existing knowledge on the association between  
53  
54 social connection and physical and mental health should be considered in clinical  
55  
56 practice. Finally, more experimental research is needed to increase our understanding  
57  
58  
59  
60

1  
2  
3 of the causal relationship between social connection and physical and psychological  
4  
5 well-being.  
6  
7  
8  
9  
10  
11  
12  
13  
14  
15  
16  
17  
18  
19  
20  
21  
22  
23  
24  
25  
26  
27  
28  
29  
30  
31  
32  
33  
34  
35  
36  
37  
38  
39  
40  
41  
42  
43  
44  
45  
46  
47  
48  
49  
50  
51  
52  
53  
54  
55  
56  
57  
58  
59  
60

For peer review only

1  
2  
3 **Figure Captions:** Fig.1. Flow diagram of study selection process.  
4  
5

6 ---

7 **Acknowledgements:** Not applicable.  
8  
9

10 **Report about dual (co-)authorship:** No authors co-authored any of the systematic  
11 reviews and meta-analyses included in our overview.  
12  
13

14  
15 **Authors' Contributions:** NM had full access to all of the data in the study and takes  
16 responsibility for the integrity of the data and the accuracy of the data analysis.  
17 NM designed the search strategy with input from AK and TM. NM and AK carried  
18 out the literature searches and screening. NM, THH, and TM carried out the data  
19 extraction. AK and TM assessed the quality of the included meta-analyses. NM and  
20 SP wrote the first draft of the manuscript and all authors contributed to and have  
21 approved the final manuscript.  
22  
23  
24  
25  
26  
27  
28

29 **Funding/Support:** No funding received.  
30  
31

32 **Conflict of Interest Disclosures:** Not applicable.  
33  
34  
35

36 **Availability of data and materials:** All data generated or analysed during this study  
37 are included in this published article and supplementary material.  
38  
39 **Ethics approval and consent to participate:** This study did not require ethical approval.  
40  
41  
42

43 **Consent for publication:** Not applicable.  
44  
45

46 **Patient and Public Involvement statement:** Not applicable.  
47  
48  
49  
50  
51  
52  
53  
54  
55  
56  
57  
58  
59  
60

## References

1. Holmes EA, O'Connor RC, Perry VH, et al. Multidisciplinary research priorities for the COVID-19 pandemic: a call for action for mental health science. *Lancet Psychiatry*. 2020;7:547-560.
2. Holt-Lunstad J. Why Social Relationships Are Important for Physical Health: A Systems Approach to Understanding and Modifying Risk and Protection. *Annu Rev Psychol*. 2018;69:437-458. doi:10.1146/annurev-psych-122216-011902.
3. Perissinotto CM, Covinsky KE. Living alone, socially isolated or lonely - what are we measuring? *Journal of General Internal Medicine*. 2014;29(11):1429-1431.
4. Holt-Lunstad J, Smith TB, Baker M, Harris T, Stephenson D. Loneliness and social isolation as risk factors for mortality: a meta-analytic review. *Perspect Psychol Sci*. 2015;10(2):227-237. doi:10.1177/1745691614568352.
5. National Academies of Sciences, Engineering, and Medicine. *Social Isolation and Loneliness in Older Adults: Opportunities for the Health Care System*. Washington, DC: National Academies Press; 2020.
6. Hawkey LC, Wroblewski K, Kaiser T, Luhmann M, Schumm LP. Are US older adults getting lonelier? Age, period, and cohort differences. *Psychology and Aging*. 2019;34(8):1144.
7. DiJulio B, Hamel L, Muñana C, Brodie M. *Loneliness and social isolation in the United States, the United Kingdom, and Japan: An international survey*. The Economist & Kaiser Family Foundation; 2018.
8. Anderson GO, Thayer CE. *Loneliness and social connections: A national survey of adults 45 and older*. Washington, DC: AARP Foundation; 2018.
9. Perissinotto CM, Cenzer IS, Covinsky KE. Loneliness in older persons: a predictor of functional decline and death. *Arch Intern Med*. 2012;172(14):1078-1084.
10. Cacioppo JT, Cacioppo S, Capitanio JP, Cole SW. The neuroendocrinology of social isolation. *Annu Rev Psychol*. 2015;66:733-767.
11. Seeman TE, Singer BH, Ryff CD, Love GD, Levy-Storms L. Social relationships, gender, and allostatic load across two age cohorts. *Psychosom Med*. 2002;64(3):395-406.

12. Hawkey LC, Capitanio JP. Perceived social isolation, evolutionary fitness and health outcomes: a lifespan approach. *Philosophical Transactions of the Royal Society B: Biological Sciences*. 2015;370(1669):20140114.
13. Grant N, Hamer M, Steptoe A. Social isolation and stress-related cardiovascular, lipid, and cortisol responses. *Annals of Behavioral Medicine*. 2009;37(1):29-37.
14. Tricco AC, Langlois EV, Straus SE, others. *Rapid reviews to strengthen health policy and systems: a practical guide*. World Health Organization Geneva; 2017.
15. Moher D, Liberati A, Tetzlaff J, Altman DG. Preferred reporting items for systematic reviews and meta-analyses: the PRISMA statement. *Ann Intern Med*. 2009;151(4):264-269.
16. Shea BJ, Reeves BC, Wells G, et al. AMSTAR 2: a critical appraisal tool for systematic reviews that include randomised or non-randomised studies of healthcare interventions, or both. *BMJ*. 2017;358:j4008.
17. Steptoe A, Kivimäki M. Stress and cardiovascular disease: an update on current knowledge. *Annu Rev Public Health*. 2013;34:337-354. doi:10.1146/annurev-publhealth-031912-114452.
18. Valtorta NK, Kanaan M, Gilbody S, Ronzi S, Hanratty B. Loneliness and social isolation as risk factors for coronary heart disease and stroke: systematic review and meta-analysis of longitudinal observational studies. *Heart*. 2016;102(13):1009-1016.
19. Rico-Urbe LA, Caballero FF, Martín-María N, Cabello M, Ayuso-Mateos JL, Miret M. Association of loneliness with all-cause mortality: A meta-analysis. *PLoS ONE*. 2018;13(1):e0190033. doi:10.1371/journal.pone.0190033.
20. Smith KJ, Gavey S, Riddell NE, Kontari P, Victor C. The association between loneliness, social isolation and inflammation: A systematic review and meta-analysis. *Neurosci Biobehav Rev*. 2020;112:519-541. doi:10.1016/j.neubiorev.2020.02.002.
21. Kojima G, Taniguchi Y, Kitamura A, Fujiwara Y. Is living alone a risk factor of frailty? A systematic review and meta-analysis. *Ageing Res Rev*. 2020;59:101048. doi:10.1016/j.arr.2020.101048.
22. Maes M, van den Noortgate W, Fustolo-Gunnink SF, Rassart J, Luyckx K, Goossens L. Loneliness in Children and Adolescents With Chronic Physical Conditions: A Meta-Analysis. *J Pediatr Psychol*. 2017;42(6):622-635. doi:10.1093/jpepsy/jsx046.



- 1  
2  
3 23. Besora-Moreno M, Llauradó E, Tarro L, Solà R. Social and Economic Factors and  
4 Malnutrition or the Risk of Malnutrition in the Elderly: A Systematic Review and  
5 Meta-Analysis of Observational Studies. *Nutrients*. 2020;12(3).  
6  
7 doi:10.3390/nu12030737.  
8  
9
- 10 24. Jain A, van Hoek AJ, Boccia D, Thomas SL. Lower vaccine uptake amongst older  
11 individuals living alone: A systematic review and meta-analysis of social  
12 determinants of vaccine uptake. *Vaccine*. 2017;35(18):2315-2328.  
13  
14 doi:10.1016/j.vaccine.2017.03.013.  
15  
16
- 17 25. Heidari Gorji MA, Fatahian A, Farsavian A. The impact of perceived and  
18 objective social isolation on hospital readmission in patients with heart failure: A  
19 systematic review and meta-analysis of observational studies. *Gen Hosp*  
20 *Psychiatry*. 2019;60:27-36. doi:10.1016/j.genhosppsy.2019.07.002.  
21  
22
- 23 26. Xiu-Ying H, Qian C, Xiao-Dong P, Xue-Mei Z, Chang-Quan H. Living  
24 arrangements and risk for late life depression: a meta-analysis of published  
25 literature. *Int J Psychiatry Med*. 2012;43(1):19-34. doi:10.2190/PM.43.1.b.  
26  
27
- 28 27. Penninkilampi R, Casey A-N, Singh MF, Brodaty H. The Association between  
29 Social Engagement, Loneliness, and Risk of Dementia: A Systematic Review and  
30 Meta-Analysis. *J Alzheimers Dis*. 2018;66(4):1619-1633. doi:10.3233/JAD-  
31 180439.  
32  
33
- 34 28. Evans IEM, Martyr A, Collins R, Brayne C, Clare L. Social Isolation and  
35 Cognitive Function in Later Life: A Systematic Review and Meta-Analysis. *J*  
36 *Alzheimers Dis*. 2019;70(s1):S119-S144. doi:10.3233/JAD-180501.  
37  
38
- 39 29. Kuiper JS, Zuidersma M, Oude Voshaar RC, et al. Social relationships and risk of  
40 dementia: A systematic review and meta-analysis of longitudinal cohort studies.  
41 *Ageing Res Rev*. 2015;22:39-57. doi:10.1016/j.arr.2015.04.006.  
42  
43
- 44 30. Lara E, Martín-María N, La Torre-Luque A de, et al. Does loneliness contribute to  
45 mild cognitive impairment and dementia? A systematic review and meta-analysis  
46 of longitudinal studies. *Ageing Res Rev*. 2019;52:7-16.  
47  
48  
49  
50  
51  
52  
53
- 54 31. Maes M, Nelemans SA, Danneel S, et al. Loneliness and social anxiety across  
55 childhood and adolescence: Multilevel meta-analyses of cross-sectional and  
56 longitudinal associations. *Dev Psychol*. 2019;55(7):1548-1565.  
57  
58  
59  
60

- 1  
2  
3  
4  
5  
6  
7  
8  
9  
10  
11  
12  
13  
14  
15  
16  
17  
18  
19  
20  
21  
22  
23  
24  
25  
26  
27  
28  
29  
30  
31  
32  
33  
34  
35  
36  
37  
38  
39  
40  
41  
42  
43  
44  
45  
46  
47  
48  
49  
50  
51  
52  
53  
54  
55  
56  
57  
58  
59  
60
32. Choi HJ, Smith RA. Members, isolates, and liaisons: meta-analysis of adolescents' network positions and their smoking behavior. *Subst Use Misuse*. 2013;48(8):612-622. doi:10.3109/10826084.2013.800111.
33. Mahon NE, Yarcheski A, Yarcheski TJ, Cannella BL, Hanks MM. A meta-analytic study of predictors for loneliness during adolescence. *Nursing Research*. 2006;55(5):308-315.
34. Chang Q, Chan CH, Yip PSF. A meta-analytic review on social relationships and suicidal ideation among older adults. *Soc Sci Med*. 2017;191:65-76. doi:10.1016/j.socscimed.2017.09.003.
35. Erzen E, Çikrikci Ö. The effect of loneliness on depression: A meta-analysis. *Int J Soc Psychiatry*. 2018;64(5):427-435. doi:10.1177/0020764018776349.
36. Michalska da Rocha B, Rhodes S, Vasilopoulou E, Hutton P. Loneliness in Psychosis: A Meta-analytical Review. *Schizophr Bull*. 2018;44(1):114-125. doi:10.1093/schbul/sbx036.
37. Chau AKC, Zhu C, So SH-W. Loneliness and the psychosis continuum: a meta-analysis on positive psychotic experiences and a meta-analysis on negative psychotic experiences. *Int Rev Psychiatry*. 2019;31(5-6):471-490. doi:10.1080/09540261.2019.1636005.
38. Teo AR, Lerrigo R, Rogers MAM. The role of social isolation in social anxiety disorder: a systematic review and meta-analysis. *J Anxiety Disord*. 2013;27(4):353-364. doi:10.1016/j.janxdis.2013.03.010.
39. Chatterjee A, Banerjee S, Stein C, Kim M-H, DeFerio J, Pathak J. Risk Factors for Depression Among Civilians After the 9/11 World Trade Center Terrorist Attacks: A Systematic Review and Meta-Analysis. *PLoS Curr*. 2018;10. doi:10.1371/currents.dis.6a00b40c8ace0a6a0017361d7577c50a.
40. Yuan M-Z, Fang Q, Liu G-W, Zhou M, Wu J-M, Pu C-Y. Risk Factors for Post-Acute Coronary Syndrome Depression: A Meta-analysis of Observational Studies. *J Cardiovasc Nurs*. 2019;34(1):60-70. doi:10.1097/JCN.0000000000000520.
41. Ong AD, Uchino BN, Wethington E. Loneliness and health in older adults: A mini-review and synthesis. *Gerontology*. 2016;62(4):443-449.
42. Howick J, Kelly P, Kelly M. Establishing a causal link between social relationships and health using the Bradford Hill Guidelines. *SSM-Population Health*. 2019;8:100402.

- 1  
2  
3 43. Szreter S, Woolcock M. Health by association? Social capital, social theory, and  
4 the political economy of public health. *Int J Epidemiol*. 2004;33(4):650-667.  
5  
6 44. Craddock E, vanDellen MR, Novak SA, Ranby KW. Influence in relationships: A  
7 meta-analysis on health-related social control. *Basic and Applied Social*  
8 *Psychology*. 2015;37(2):118-130.  
9  
10 45. Postmes T, Wichmann LJ, van Valkengoed AM, van der Hoef H. Social  
11 identification and depression: A meta-analysis. *European Journal of Social*  
12 *Psychology*. 2019;49(1):110-126.  
13  
14 46. Uchino BN, Bowen K, Grey RK de, Mikel J, Fisher EB. Social support and  
15 physical health: Models, mechanisms, and opportunities. In: *Principles and*  
16 *concepts of behavioral medicine*. Springer; 2018:341-372.  
17  
18 47. Siette J, Cassidy M, Priebe S. Effectiveness of befriending interventions: a  
19 systematic review and meta-analysis. *BMJ open*. 2017;7(4):e014304.  
20  
21 48. Fakoya OA, McCorry NK, Donnelly M. Loneliness and social isolation  
22 interventions for older adults: a scoping review of reviews. *BMC Public Health*.  
23 2020;20(1):1-14.  
24  
25 49. Czaja SJ, Boot WR, Charness N, Rogers WA, Sharit J. Improving social support  
26 for older adults through technology: Findings from the PRISM randomized  
27 controlled trial. *The Gerontologist*. 2018;58(3):467-477.  
28  
29 50. Steffens NK, LaRue CJ, Haslam C, et al. Social identification-building  
30 interventions to improve health: A systematic review and meta-analysis. *Health*  
31 *Psychology Review*. 2019:1-28.  
32  
33  
34  
35  
36  
37  
38  
39  
40  
41  
42  
43  
44  
45  
46  
47  
48  
49  
50  
51  
52  
53  
54  
55  
56  
57  
58  
59  
60

1  
2  
3  
4  
5  
6  
7  
8  
9  
10  
11  
12  
13  
14  
15  
16  
17  
18  
19  
20  
21  
22  
23  
24  
25  
26  
27  
28  
29  
30  
31  
32  
33  
34  
35  
36  
37  
38  
39  
40  
41  
42  
43  
44  
45  
46  
47  
48  
49  
50  
51  
52  
53  
54  
55  
56  
57  
58  
59  
60

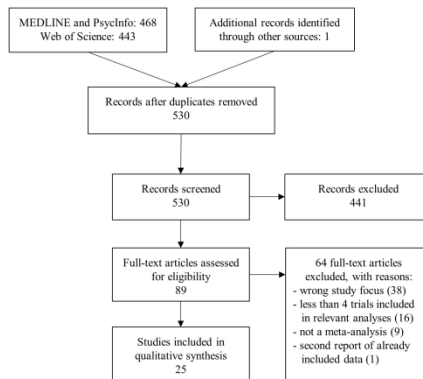

Fig. 1. Flow diagram of study selection process

338x190mm (300 x 300 DPI)

## MOOSE (Meta-analyses Of Observational Studies in Epidemiology) Checklist

A reporting checklist for Authors, Editors, and Reviewers of Meta-analyses of Observational Studies. You must report the page number in your manuscript where you consider each of the items listed in this checklist. If you have not included this information, either revise your manuscript accordingly before submitting or note N/A.

| Reporting Criteria                                                                                              | Reported (Yes/No) | Reported on Page No. |
|-----------------------------------------------------------------------------------------------------------------|-------------------|----------------------|
| <b>Reporting of Background</b>                                                                                  |                   |                      |
| Problem definition                                                                                              |                   |                      |
| Hypothesis statement                                                                                            |                   |                      |
| Description of Study Outcome(s)                                                                                 |                   |                      |
| Type of exposure or intervention used                                                                           |                   |                      |
| Type of study design used                                                                                       |                   |                      |
| Study population                                                                                                |                   |                      |
| <b>Reporting of Search Strategy</b>                                                                             |                   |                      |
| Qualifications of searchers (eg, librarians and investigators)                                                  |                   |                      |
| Search strategy, including time period included in the synthesis and keywords                                   |                   |                      |
| Effort to include all available studies, including contact with authors                                         |                   |                      |
| Databases and registries searched                                                                               |                   |                      |
| Search software used, name and version, including special features used (eg, explosion)                         |                   |                      |
| Use of hand searching (eg, reference lists of obtained articles)                                                |                   |                      |
| List of citations located and those excluded, including justification                                           |                   |                      |
| Method for addressing articles published in languages other than English                                        |                   |                      |
| Method of handling abstracts and unpublished studies                                                            |                   |                      |
| Description of any contact with authors                                                                         |                   |                      |
| <b>Reporting of Methods</b>                                                                                     |                   |                      |
| Description of relevance or appropriateness of studies assembled for assessing the hypothesis to be tested      |                   |                      |
| Rationale for the selection and coding of data (eg, sound clinical principles or convenience)                   |                   |                      |
| Documentation of how data were classified and coded (eg, multiple raters, blinding, and interrater reliability) |                   |                      |
| Assessment of confounding (eg, comparability of cases and controls in studies where appropriate)                |                   |                      |

| Reporting Criteria                                                                                                                                                                                                                                                           | Reported (Yes/No) | Reported on Page No. |
|------------------------------------------------------------------------------------------------------------------------------------------------------------------------------------------------------------------------------------------------------------------------------|-------------------|----------------------|
| Assessment of study quality, including blinding of quality assessors; stratification or regression on possible predictors of study results                                                                                                                                   |                   |                      |
| Assessment of heterogeneity                                                                                                                                                                                                                                                  |                   |                      |
| Description of statistical methods (eg, complete description of fixed or random effects models, justification of whether the chosen models account for predictors of study results, dose-response models, or cumulative meta-analysis) in sufficient detail to be replicated |                   |                      |
| Provision of appropriate tables and graphics                                                                                                                                                                                                                                 |                   |                      |
| <b>Reporting of Results</b>                                                                                                                                                                                                                                                  |                   |                      |
| Table giving descriptive information for each study included                                                                                                                                                                                                                 |                   |                      |
| Results of sensitivity testing (eg, subgroup analysis)                                                                                                                                                                                                                       |                   |                      |
| Indication of statistical uncertainty of findings                                                                                                                                                                                                                            |                   |                      |
| <b>Reporting of Discussion</b>                                                                                                                                                                                                                                               |                   |                      |
| Quantitative assessment of bias (eg, publication bias)                                                                                                                                                                                                                       |                   |                      |
| Justification for exclusion (eg, exclusion of non-English-language citations)                                                                                                                                                                                                |                   |                      |
| Assessment of quality of included studies                                                                                                                                                                                                                                    |                   |                      |
| <b>Reporting of Conclusions</b>                                                                                                                                                                                                                                              |                   |                      |
| Consideration of alternative explanations for observed results                                                                                                                                                                                                               |                   |                      |
| Generalization of the conclusions (ie, appropriate for the data presented and within the domain of the literature review)                                                                                                                                                    |                   |                      |
| Guidelines for future research                                                                                                                                                                                                                                               |                   |                      |
| Disclosure of funding source                                                                                                                                                                                                                                                 |                   |                      |

Once you have completed this checklist, please save a copy and upload it as part of your submission. DO NOT include this checklist as part of the main manuscript document. It must be uploaded as a separate file.
